# Supplementary material for: Benchmarking of protein descriptor sets in proteochemometric modeling (part 1): comparative study of 13 amino acid descriptor sets
Source: PubMed Central journal article supplement (PMC3848949; doi:10.1186/1758-2946-5-41), 2013-09-23
Supplement: 1758-2946-5-41-S1.pdf [file 1758-2946-5-41-S1.pdf]

# Benchmarking of Protein Descriptor Sets in Proteochemometric Modeling (Part 1)

## *Comparative Study of 13 Amino Acid Descriptors*

### **Additional File 1**

*Gerard J.P. van Westen*<sup>1</sup>, *Remco F. Swier*<sup>1</sup>, *Jörg K. Wegner*<sup>2</sup>, *Adriaan P. IJzerman*<sup>1</sup>,  
*Herman W.T. van Vlijmen*<sup>1,2</sup>, *Andreas Bender*<sup>1,3</sup>

<sup>1</sup> Division of Medicinal Chemistry, Leiden / Amsterdam Center for Drug Research,  
Einsteinweg 55, 2333 CC, Leiden, The Netherlands

<sup>2</sup> Tibotec BVBA, Turnhoutseweg 30, 2340 Beerse, Belgium

<sup>3</sup> Unilever Centre for Molecular Science Informatics, Department of Chemistry,  
University of Cambridge, Lensfield Road, Cambridge, CB2 1EW, United Kingdom

## Table of Contents:

|                                                                                       |    |
|---------------------------------------------------------------------------------------|----|
| Supporting Table S1. List of Indices used along with a description of the index. .... | 4  |
| Supporting table S2. Scaled distance matrix ProtFP_PCA (3). ....                      | 6  |
| Supporting table S3. Scaled distance matrix ProtFP_PCA (5). ....                      | 7  |
| Supporting table S4. Scaled distance matrix ProtFP_PCA (8). ....                      | 8  |
| Supporting table S5. Scaled distance matrix Z-Scales (3). ....                        | 9  |
| Supporting table S6. Scaled distance matrix Z-Scales (5). ....                        | 10 |
| Supporting table S7. Scaled distance matrix Z-Scales (Binned). ....                   | 11 |
| Supporting table S8. Scaled distance matrix VHSE. ....                                | 12 |
| Supporting table S9. Scaled distance matrix ST-Scales. ....                           | 13 |
| Supporting table S10. Scaled distance matrix T-Scales. ....                           | 14 |
| Supporting table S11. Scaled distance matrix MSWHIM. ....                             | 15 |
| Supporting table S12. Scaled distance matrix FASGAI. ....                             | 16 |
| Supporting table S13. Scaled distance matrix BLOSUM. ....                             | 17 |
| Supporting table S14. Scaled distance matrix ProtFP_PCA using 2 PCs. ....             | 18 |
| Supporting table S15. Scaled distance matrix Z-Scales using 2 PCs. ....               | 19 |
| Supporting table S16. Scaled distance matrix VHSE using 2 PCs. ....                   | 20 |
| Supporting table S17. Scaled distance matrix ST-Scales using 2 PCs. ....              | 21 |
| Supporting table S18. Scaled distance matrix T-Scales using 2 PCs. ....               | 22 |
| Supporting table S19. Scaled distance matrix MSWHIM using 2 PCs. ....                 | 23 |
| Supporting table S20. Scaled distance matrix FASGAI using 2 PCs. ....                 | 24 |
| Supporting table S21. Scaled distance matrix BLOSUM using 2 PCs. ....                 | 25 |
| Supporting Table S22. The binned Z-Scales ....                                        | 26 |
| Supporting figure S1. Plot of the first two PCs in the ST-scales descriptor set. .... | 27 |
| Supporting Figure S2. Heat map of the ProtFP_PCA (3) descriptor set ....              | 28 |
| Supporting Figure S3. Heat map of the ProtFP_PCA (5) descriptor set ....              | 29 |
| Supporting Figure S4. Heat map of the ProtFP_PCA (8) descriptor set ....              | 30 |
| Supporting Figure S5. Heat map of the Z-Scales (3) descriptor set ....                | 31 |
| Supporting Figure S6. Heat map of the Z-Scales (5) descriptor set ....                | 32 |
| Supporting Figure S7. Heat map of the Z-Scales (Binned) descriptor set. ....          | 33 |
| Supporting figure S8. Heat map of the VHSE descriptor set ....                        | 34 |
| Supporting figure S9. Heat map of the ST-Scales descriptor set. ....                  | 35 |
| Supporting figure S10. Heat map of the T-Scales descriptor set. ....                  | 36 |
| Supporting figure S11. Heat map of the MSWHIM descriptor set. ....                    | 37 |

|                                                                                         |    |
|-----------------------------------------------------------------------------------------|----|
| Supporting figure S12. Heat map of the FASGAI descriptor set .....                      | 38 |
| Supporting figure S13. Heat map of the BLOSUM descriptor set .....                      | 39 |
| Supporting figure S14. Plot of the first two PCs in the ProtFP_PCA descriptor set. .... | 40 |
| Supporting figure S15. Plot of the first two PCs in the Z-scales descriptor set.....    | 41 |
| Supporting figure S16. Plot of the first two PCs in the VHSE descriptor set.....        | 42 |
| Supporting figure S17. Plot of the first two PCs in the T-scales descriptor set.....    | 43 |
| Supporting figure S18. Plot of the first two PCs in the MSWHIM descriptor set.....      | 44 |
| Supporting figure S19. Plot of the first two PCs in the FASGAI descriptor set.....      | 45 |
| Supporting figure S20. Plot of the first two PCs in the BLOSUM descriptor set. ....     | 46 |

**Supporting Table S1. List of Indices used along with a description of the index.**

| Number | Identifier | Descriptor                                             |
|--------|------------|--------------------------------------------------------|
| 1      | ARGP820103 | Membrane-buried preference parameters                  |
| 2      | BAEK050101 | Linker index                                           |
| 3      | BHAR880101 | Average flexibility indices                            |
| 4      | CASG920101 | Hydrophobicity scale from native protein structures    |
| 5      | CHAM810101 | Steric parameter                                       |
| 6      | CHAM820101 | Polarizability parameter                               |
| 7      | CHAM830101 | The Chou-Fasman parameter of the coil conformation     |
| 8      | CHAM830107 | A parameter of charge transfer capability              |
| 9      | CHAM830108 | A parameter of charge transfer donor capability        |
| 10     | CHOP780201 | Normalized frequency of alpha-helix                    |
| 11     | CHOP780202 | Normalized frequency of beta-sheet                     |
| 12     | CHOP780203 | Normalized frequency of beta-turn                      |
| 13     | CIDH920105 | Normalized average hydrophobicity scales               |
| 14     | COSI940101 | Electron-ion interaction potential values              |
| 15     | FASG760101 | Molecular weight                                       |
| 16     | FAUJ880102 | Smoothed epsilon steric parameter                      |
| 17     | FAUJ880103 | Normalized van der Waals volume                        |
| 18     | FAUJ880104 | STERIMOL length of the side chain                      |
| 19     | FAUJ880105 | STERIMOL minimum width of the side chain               |
| 20     | FAUJ880106 | STERIMOL maximum width of the side chain               |
| 21     | FAUJ880109 | Number of hydrogen bond donors                         |
| 22     | FAUJ880110 | Number of full nonbonding orbitals                     |
| 23     | FAUJ880111 | Positive charge                                        |
| 24     | FAUJ880112 | Negative charge                                        |
| 25     | FAUJ880113 | pK-a(RCOOH)                                            |
| 26     | GRAR740102 | Polarity                                               |
| 27     | JANJ780102 | Percentage of buried residues                          |
| 28     | JANJ780103 | Percentage of exposed residues                         |
| 29     | JOND920102 | Relative mutability                                    |
| 30     | JUNJ780101 | Sequence frequency                                     |
| 31     | KLEP840101 | Net charge                                             |
| 32     | KOEP990101 | Alpha-helix propensity derived from designed sequences |
| 33     | KOEP990102 | Beta-sheet propensity derived from designed sequences  |
| 34     | KRIW790101 | Side chain interaction parameter                       |
| 35     | KYTJ820101 | Hydropathy index                                       |
| 36     | LEVM760102 | Distance between C-alpha and centroid of side chain    |
| 37     | LEVM760103 | Side chain angle theta(AAR)                            |
| 38     | LEVM760104 | Side chain torsion angle phi(AAAR)                     |
| 39     | LEVM760105 | Radius of gyration of side chain                       |
| 40     | LEVM760106 | van der Waals parameter R0                             |

|    |            |                                                              |
|----|------------|--------------------------------------------------------------|
| 41 | LEVM760107 | van der Waals parameter epsilon                              |
| 42 | MITS020101 | Amphiphilicity index                                         |
| 43 | MONM990201 | Averaged turn propensities in a transmembrane helix          |
| 44 | NISK800101 | 8 A contact number                                           |
| 45 | NISK860101 | 14 A contact number                                          |
| 46 | PONP800101 | Surrounding hydrophobicity in folded form                    |
| 47 | PONP930101 | Hydrophobicity scales                                        |
| 48 | RACS770103 | Side chain orientational preference                          |
| 49 | RADA880108 | Mean polarity                                                |
| 50 | ROSG850101 | Mean area buried on transfer                                 |
| 51 | ROSG850102 | Mean fractional area loss                                    |
| 52 | ROSM880102 | Side chain hydrophathy, corrected for solvation              |
| 53 | TAKK010101 | Side-chain contribution to protein stability                 |
| 54 | VINM940101 | Normalized flexibility parameters (B-values), average        |
| 55 | WARP780101 | Average interactions per side chain atom                     |
| 56 | WOLR810101 | Hydration potential                                          |
| 57 | ZHOH040102 | Relative stability scale extracted from mutation experiments |
| 58 | ZHOH040103 | Buriability                                                  |

---

**Supporting table S2. Scaled distance matrix ProtFP\_PCA (3).**

| Residue | G    | A    | C    | V    | L    | I    | M    | F    | W    | Y    | H    | T    | P    | S    | D    | N    | E    | Q    | K    | R    |
|---------|------|------|------|------|------|------|------|------|------|------|------|------|------|------|------|------|------|------|------|------|
| G       | 0.00 | 0.72 | 0.63 | 0.87 | 0.89 | 0.95 | 0.88 | 0.86 | 0.98 | 0.85 | 0.76 | 0.67 | 0.44 | 0.62 | 0.92 | 0.70 | 1.00 | 0.85 | 0.88 | 0.96 |
| A       | 0.72 | 0.00 | 0.46 | 0.33 | 0.39 | 0.40 | 0.44 | 0.57 | 0.82 | 0.71 | 0.56 | 0.32 | 0.62 | 0.34 | 0.49 | 0.49 | 0.53 | 0.54 | 0.70 | 0.77 |
| C       | 0.63 | 0.46 | 0.00 | 0.42 | 0.40 | 0.46 | 0.39 | 0.35 | 0.54 | 0.47 | 0.43 | 0.42 | 0.46 | 0.50 | 0.73 | 0.54 | 0.75 | 0.60 | 0.68 | 0.70 |
| V       | 0.87 | 0.33 | 0.42 | 0.00 | 0.24 | 0.23 | 0.30 | 0.44 | 0.69 | 0.63 | 0.53 | 0.40 | 0.70 | 0.49 | 0.59 | 0.57 | 0.58 | 0.57 | 0.72 | 0.75 |
| L       | 0.89 | 0.39 | 0.40 | 0.24 | 0.00 | 0.23 | 0.24 | 0.35 | 0.59 | 0.55 | 0.47 | 0.41 | 0.68 | 0.50 | 0.60 | 0.55 | 0.58 | 0.53 | 0.67 | 0.68 |
| I       | 0.95 | 0.40 | 0.46 | 0.23 | 0.23 | 0.00 | 0.28 | 0.42 | 0.66 | 0.62 | 0.54 | 0.46 | 0.76 | 0.55 | 0.62 | 0.61 | 0.60 | 0.59 | 0.73 | 0.75 |
| M       | 0.88 | 0.44 | 0.39 | 0.30 | 0.24 | 0.28 | 0.00 | 0.29 | 0.50 | 0.45 | 0.38 | 0.39 | 0.63 | 0.49 | 0.58 | 0.49 | 0.56 | 0.47 | 0.58 | 0.58 |
| F       | 0.86 | 0.57 | 0.35 | 0.44 | 0.35 | 0.42 | 0.29 | 0.00 | 0.35 | 0.34 | 0.36 | 0.48 | 0.59 | 0.58 | 0.72 | 0.55 | 0.70 | 0.54 | 0.59 | 0.57 |
| W       | 0.98 | 0.82 | 0.54 | 0.69 | 0.59 | 0.66 | 0.50 | 0.35 | 0.00 | 0.28 | 0.42 | 0.67 | 0.66 | 0.76 | 0.87 | 0.65 | 0.85 | 0.64 | 0.60 | 0.52 |
| Y       | 0.85 | 0.71 | 0.47 | 0.63 | 0.55 | 0.62 | 0.45 | 0.34 | 0.28 | 0.00 | 0.28 | 0.53 | 0.51 | 0.61 | 0.72 | 0.49 | 0.72 | 0.49 | 0.45 | 0.39 |
| H       | 0.76 | 0.56 | 0.43 | 0.53 | 0.47 | 0.54 | 0.38 | 0.36 | 0.42 | 0.28 | 0.00 | 0.37 | 0.43 | 0.44 | 0.55 | 0.33 | 0.56 | 0.34 | 0.35 | 0.35 |
| T       | 0.67 | 0.32 | 0.42 | 0.40 | 0.41 | 0.46 | 0.39 | 0.48 | 0.67 | 0.53 | 0.37 | 0.00 | 0.46 | 0.24 | 0.40 | 0.30 | 0.44 | 0.35 | 0.48 | 0.56 |
| P       | 0.44 | 0.62 | 0.46 | 0.70 | 0.68 | 0.76 | 0.63 | 0.59 | 0.66 | 0.51 | 0.43 | 0.46 | 0.00 | 0.45 | 0.70 | 0.42 | 0.76 | 0.55 | 0.54 | 0.60 |
| S       | 0.62 | 0.34 | 0.50 | 0.49 | 0.50 | 0.55 | 0.49 | 0.58 | 0.76 | 0.61 | 0.44 | 0.24 | 0.45 | 0.00 | 0.38 | 0.30 | 0.45 | 0.38 | 0.50 | 0.60 |
| D       | 0.92 | 0.49 | 0.73 | 0.59 | 0.60 | 0.62 | 0.58 | 0.72 | 0.87 | 0.72 | 0.55 | 0.40 | 0.70 | 0.38 | 0.00 | 0.38 | 0.24 | 0.34 | 0.48 | 0.59 |
| N       | 0.70 | 0.49 | 0.54 | 0.57 | 0.55 | 0.61 | 0.49 | 0.55 | 0.65 | 0.49 | 0.33 | 0.30 | 0.42 | 0.30 | 0.38 | 0.00 | 0.42 | 0.26 | 0.32 | 0.42 |
| E       | 1.00 | 0.53 | 0.75 | 0.58 | 0.58 | 0.60 | 0.56 | 0.70 | 0.85 | 0.72 | 0.56 | 0.44 | 0.76 | 0.45 | 0.24 | 0.42 | 0.00 | 0.34 | 0.49 | 0.58 |
| Q       | 0.85 | 0.54 | 0.60 | 0.57 | 0.53 | 0.59 | 0.47 | 0.54 | 0.64 | 0.49 | 0.34 | 0.35 | 0.55 | 0.38 | 0.34 | 0.26 | 0.34 | 0.00 | 0.29 | 0.36 |
| K       | 0.88 | 0.70 | 0.68 | 0.72 | 0.67 | 0.73 | 0.58 | 0.59 | 0.60 | 0.45 | 0.35 | 0.48 | 0.54 | 0.50 | 0.48 | 0.32 | 0.49 | 0.29 | 0.00 | 0.25 |
| R       | 0.96 | 0.77 | 0.70 | 0.75 | 0.68 | 0.75 | 0.58 | 0.57 | 0.52 | 0.39 | 0.35 | 0.56 | 0.60 | 0.60 | 0.59 | 0.42 | 0.58 | 0.36 | 0.25 | 0.00 |

**Supporting table S3. Scaled distance matrix ProtFP\_PCA (5).**

| Residue | G    | A    | C    | V    | L    | I    | M    | F    | W    | Y    | H    | T    | P    | S    | D    | N    | E    | Q    | K    | R    |
|---------|------|------|------|------|------|------|------|------|------|------|------|------|------|------|------|------|------|------|------|------|
| G       | 0.00 | 0.73 | 0.74 | 0.84 | 0.85 | 0.90 | 0.81 | 0.78 | 0.90 | 0.77 | 0.75 | 0.68 | 0.61 | 0.65 | 0.91 | 0.68 | 0.94 | 0.81 | 0.93 | 0.98 |
| A       | 0.73 | 0.00 | 0.72 | 0.30 | 0.41 | 0.37 | 0.44 | 0.60 | 0.87 | 0.72 | 0.56 | 0.36 | 0.68 | 0.37 | 0.82 | 0.53 | 0.68 | 0.53 | 0.66 | 0.75 |
| C       | 0.74 | 0.72 | 0.00 | 0.64 | 0.78 | 0.68 | 0.56 | 0.59 | 0.76 | 0.61 | 0.53 | 0.54 | 0.99 | 0.60 | 0.84 | 0.57 | 1.00 | 0.66 | 0.97 | 0.76 |
| V       | 0.84 | 0.30 | 0.64 | 0.00 | 0.33 | 0.22 | 0.30 | 0.48 | 0.76 | 0.64 | 0.51 | 0.39 | 0.77 | 0.46 | 0.84 | 0.56 | 0.72 | 0.53 | 0.70 | 0.72 |
| L       | 0.85 | 0.41 | 0.78 | 0.33 | 0.00 | 0.28 | 0.33 | 0.40 | 0.63 | 0.58 | 0.57 | 0.52 | 0.65 | 0.58 | 0.83 | 0.63 | 0.61 | 0.59 | 0.66 | 0.78 |
| I       | 0.90 | 0.37 | 0.68 | 0.22 | 0.28 | 0.00 | 0.28 | 0.45 | 0.71 | 0.62 | 0.53 | 0.45 | 0.79 | 0.53 | 0.84 | 0.60 | 0.69 | 0.56 | 0.70 | 0.74 |
| M       | 0.81 | 0.44 | 0.56 | 0.30 | 0.33 | 0.28 | 0.00 | 0.31 | 0.55 | 0.43 | 0.38 | 0.38 | 0.73 | 0.47 | 0.73 | 0.47 | 0.64 | 0.44 | 0.63 | 0.60 |
| F       | 0.78 | 0.60 | 0.59 | 0.48 | 0.40 | 0.45 | 0.31 | 0.00 | 0.35 | 0.31 | 0.44 | 0.53 | 0.68 | 0.61 | 0.76 | 0.55 | 0.69 | 0.55 | 0.70 | 0.68 |
| W       | 0.90 | 0.87 | 0.76 | 0.76 | 0.63 | 0.71 | 0.55 | 0.35 | 0.00 | 0.31 | 0.59 | 0.76 | 0.75 | 0.83 | 0.85 | 0.71 | 0.78 | 0.71 | 0.80 | 0.76 |
| Y       | 0.77 | 0.72 | 0.61 | 0.64 | 0.58 | 0.62 | 0.43 | 0.31 | 0.31 | 0.00 | 0.37 | 0.56 | 0.67 | 0.62 | 0.75 | 0.49 | 0.71 | 0.50 | 0.63 | 0.55 |
| H       | 0.75 | 0.56 | 0.53 | 0.51 | 0.57 | 0.53 | 0.38 | 0.44 | 0.59 | 0.37 | 0.00 | 0.34 | 0.70 | 0.40 | 0.76 | 0.31 | 0.74 | 0.31 | 0.51 | 0.36 |
| T       | 0.68 | 0.36 | 0.54 | 0.39 | 0.52 | 0.45 | 0.38 | 0.53 | 0.76 | 0.56 | 0.34 | 0.00 | 0.70 | 0.22 | 0.71 | 0.30 | 0.68 | 0.32 | 0.57 | 0.52 |
| P       | 0.61 | 0.68 | 0.99 | 0.77 | 0.65 | 0.79 | 0.73 | 0.68 | 0.75 | 0.67 | 0.70 | 0.70 | 0.00 | 0.69 | 1.00 | 0.71 | 0.78 | 0.74 | 0.60 | 0.85 |
| S       | 0.65 | 0.37 | 0.60 | 0.46 | 0.58 | 0.53 | 0.47 | 0.61 | 0.83 | 0.62 | 0.40 | 0.22 | 0.69 | 0.00 | 0.70 | 0.30 | 0.68 | 0.35 | 0.58 | 0.56 |
| D       | 0.91 | 0.82 | 0.84 | 0.84 | 0.83 | 0.84 | 0.73 | 0.76 | 0.85 | 0.75 | 0.76 | 0.71 | 1.00 | 0.70 | 0.00 | 0.60 | 0.48 | 0.63 | 0.95 | 0.90 |
| N       | 0.68 | 0.53 | 0.57 | 0.56 | 0.63 | 0.60 | 0.47 | 0.55 | 0.71 | 0.49 | 0.31 | 0.30 | 0.71 | 0.30 | 0.60 | 0.00 | 0.63 | 0.25 | 0.55 | 0.45 |
| E       | 0.94 | 0.68 | 1.00 | 0.72 | 0.61 | 0.69 | 0.64 | 0.69 | 0.78 | 0.71 | 0.74 | 0.68 | 0.78 | 0.68 | 0.48 | 0.63 | 0.00 | 0.59 | 0.73 | 0.86 |
| Q       | 0.81 | 0.53 | 0.66 | 0.53 | 0.59 | 0.56 | 0.44 | 0.55 | 0.71 | 0.50 | 0.31 | 0.32 | 0.74 | 0.35 | 0.63 | 0.25 | 0.59 | 0.00 | 0.47 | 0.38 |
| K       | 0.93 | 0.66 | 0.97 | 0.70 | 0.66 | 0.70 | 0.63 | 0.70 | 0.80 | 0.63 | 0.51 | 0.57 | 0.60 | 0.58 | 0.95 | 0.55 | 0.73 | 0.47 | 0.00 | 0.46 |
| R       | 0.98 | 0.75 | 0.76 | 0.72 | 0.78 | 0.74 | 0.60 | 0.68 | 0.76 | 0.55 | 0.36 | 0.52 | 0.85 | 0.56 | 0.90 | 0.45 | 0.86 | 0.38 | 0.46 | 0.00 |

**Supporting table S4. Scaled distance matrix ProtFP\_PCA (8).**

| Residue | G    | A    | C    | V    | L    | I    | M    | F    | W    | Y    | H    | T    | P    | S    | D    | N    | E    | Q    | K    | R    |
|---------|------|------|------|------|------|------|------|------|------|------|------|------|------|------|------|------|------|------|------|------|
| G       | 0.00 | 0.75 | 0.79 | 0.86 | 0.82 | 0.94 | 0.96 | 0.86 | 0.84 | 0.84 | 0.95 | 0.86 | 1.00 | 0.78 | 0.99 | 0.82 | 0.89 | 0.80 | 0.87 | 0.92 |
| A       | 0.75 | 0.00 | 0.70 | 0.58 | 0.48 | 0.67 | 0.49 | 0.58 | 0.81 | 0.82 | 0.80 | 0.54 | 0.88 | 0.48 | 0.82 | 0.78 | 0.72 | 0.52 | 0.63 | 0.71 |
| C       | 0.79 | 0.70 | 0.00 | 0.66 | 0.71 | 0.71 | 0.62 | 0.57 | 0.72 | 0.65 | 0.65 | 0.60 | 0.97 | 0.56 | 0.78 | 0.61 | 0.93 | 0.62 | 0.92 | 0.70 |
| V       | 0.86 | 0.58 | 0.66 | 0.00 | 0.40 | 0.22 | 0.74 | 0.62 | 0.74 | 0.58 | 0.79 | 0.52 | 0.89 | 0.52 | 0.83 | 0.58 | 0.75 | 0.57 | 0.71 | 0.70 |
| L       | 0.82 | 0.48 | 0.71 | 0.40 | 0.00 | 0.40 | 0.55 | 0.48 | 0.59 | 0.62 | 0.69 | 0.64 | 0.80 | 0.59 | 0.82 | 0.65 | 0.57 | 0.56 | 0.63 | 0.71 |
| I       | 0.94 | 0.67 | 0.71 | 0.22 | 0.40 | 0.00 | 0.77 | 0.65 | 0.74 | 0.58 | 0.78 | 0.61 | 0.89 | 0.60 | 0.86 | 0.58 | 0.74 | 0.64 | 0.76 | 0.75 |
| M       | 0.96 | 0.49 | 0.62 | 0.74 | 0.55 | 0.77 | 0.00 | 0.41 | 0.69 | 0.80 | 0.64 | 0.66 | 0.87 | 0.61 | 0.80 | 0.80 | 0.76 | 0.57 | 0.75 | 0.69 |
| F       | 0.86 | 0.58 | 0.57 | 0.62 | 0.48 | 0.65 | 0.41 | 0.00 | 0.41 | 0.51 | 0.74 | 0.54 | 0.76 | 0.57 | 0.70 | 0.73 | 0.76 | 0.53 | 0.69 | 0.65 |
| W       | 0.84 | 0.81 | 0.72 | 0.74 | 0.59 | 0.74 | 0.69 | 0.41 | 0.00 | 0.41 | 0.83 | 0.76 | 0.91 | 0.79 | 0.82 | 0.79 | 0.77 | 0.64 | 0.71 | 0.68 |
| Y       | 0.84 | 0.82 | 0.65 | 0.58 | 0.62 | 0.58 | 0.80 | 0.51 | 0.41 | 0.00 | 0.80 | 0.58 | 0.81 | 0.62 | 0.74 | 0.58 | 0.80 | 0.55 | 0.66 | 0.58 |
| H       | 0.95 | 0.80 | 0.65 | 0.79 | 0.69 | 0.78 | 0.64 | 0.74 | 0.83 | 0.80 | 0.00 | 0.85 | 0.87 | 0.71 | 0.95 | 0.51 | 0.76 | 0.67 | 0.82 | 0.66 |
| T       | 0.86 | 0.54 | 0.60 | 0.52 | 0.64 | 0.61 | 0.66 | 0.54 | 0.76 | 0.58 | 0.85 | 0.00 | 0.78 | 0.27 | 0.65 | 0.63 | 0.85 | 0.42 | 0.63 | 0.58 |
| P       | 1.00 | 0.88 | 0.97 | 0.89 | 0.80 | 0.89 | 0.87 | 0.76 | 0.91 | 0.81 | 0.87 | 0.78 | 0.00 | 0.72 | 0.96 | 0.81 | 0.96 | 0.86 | 0.86 | 0.95 |
| S       | 0.78 | 0.48 | 0.56 | 0.52 | 0.59 | 0.60 | 0.61 | 0.57 | 0.79 | 0.62 | 0.71 | 0.27 | 0.72 | 0.00 | 0.63 | 0.51 | 0.75 | 0.37 | 0.60 | 0.55 |
| D       | 0.99 | 0.82 | 0.78 | 0.83 | 0.82 | 0.86 | 0.80 | 0.70 | 0.82 | 0.74 | 0.95 | 0.65 | 0.96 | 0.63 | 0.00 | 0.72 | 0.66 | 0.61 | 0.92 | 0.86 |
| N       | 0.82 | 0.78 | 0.61 | 0.58 | 0.65 | 0.58 | 0.80 | 0.73 | 0.79 | 0.58 | 0.51 | 0.63 | 0.81 | 0.51 | 0.72 | 0.00 | 0.66 | 0.51 | 0.72 | 0.58 |
| E       | 0.89 | 0.72 | 0.93 | 0.75 | 0.57 | 0.74 | 0.76 | 0.76 | 0.77 | 0.80 | 0.76 | 0.85 | 0.96 | 0.75 | 0.66 | 0.66 | 0.00 | 0.62 | 0.74 | 0.82 |
| Q       | 0.80 | 0.52 | 0.62 | 0.57 | 0.56 | 0.64 | 0.57 | 0.53 | 0.64 | 0.55 | 0.67 | 0.42 | 0.86 | 0.37 | 0.61 | 0.51 | 0.62 | 0.00 | 0.43 | 0.34 |
| K       | 0.87 | 0.63 | 0.92 | 0.71 | 0.63 | 0.76 | 0.75 | 0.69 | 0.71 | 0.66 | 0.82 | 0.63 | 0.86 | 0.60 | 0.92 | 0.72 | 0.74 | 0.43 | 0.00 | 0.43 |
| R       | 0.92 | 0.71 | 0.70 | 0.70 | 0.71 | 0.75 | 0.69 | 0.65 | 0.68 | 0.58 | 0.66 | 0.58 | 0.95 | 0.55 | 0.86 | 0.58 | 0.82 | 0.34 | 0.43 | 0.00 |



**Supporting table S5. Scaled distance matrix Z-Scales (3).**

| Residue | G    | A    | C    | V    | L    | I    | M    | F    | W    | Y    | H    | T    | P    | S    | D    | N    | E    | Q    | K    | R    |
|---------|------|------|------|------|------|------|------|------|------|------|------|------|------|------|------|------|------|------|------|------|
| G       | 0.00 | 0.29 | 0.52 | 0.46 | 0.60 | 0.57 | 0.55 | 0.77 | 0.93 | 0.74 | 0.63 | 0.34 | 0.57 | 0.37 | 0.58 | 0.60 | 0.48 | 0.54 | 0.63 | 0.83 |
| A       | 0.29 | 0.00 | 0.43 | 0.38 | 0.46 | 0.45 | 0.36 | 0.56 | 0.72 | 0.55 | 0.49 | 0.29 | 0.38 | 0.29 | 0.49 | 0.48 | 0.39 | 0.43 | 0.55 | 0.75 |
| C       | 0.52 | 0.43 | 0.00 | 0.71 | 0.75 | 0.76 | 0.53 | 0.63 | 0.79 | 0.64 | 0.59 | 0.62 | 0.40 | 0.39 | 0.45 | 0.52 | 0.56 | 0.69 | 0.82 | 1.00 |
| V       | 0.46 | 0.38 | 0.71 | 0.00 | 0.27 | 0.24 | 0.40 | 0.60 | 0.74 | 0.59 | 0.64 | 0.31 | 0.54 | 0.54 | 0.74 | 0.68 | 0.55 | 0.48 | 0.54 | 0.73 |
| L       | 0.60 | 0.46 | 0.75 | 0.27 | 0.00 | 0.21 | 0.34 | 0.49 | 0.61 | 0.49 | 0.64 | 0.41 | 0.51 | 0.60 | 0.77 | 0.69 | 0.59 | 0.50 | 0.55 | 0.73 |
| I       | 0.57 | 0.45 | 0.76 | 0.24 | 0.21 | 0.00 | 0.37 | 0.53 | 0.66 | 0.53 | 0.65 | 0.39 | 0.53 | 0.59 | 0.77 | 0.70 | 0.59 | 0.49 | 0.55 | 0.72 |
| M       | 0.55 | 0.36 | 0.53 | 0.40 | 0.34 | 0.37 | 0.00 | 0.32 | 0.47 | 0.33 | 0.47 | 0.42 | 0.28 | 0.43 | 0.55 | 0.49 | 0.47 | 0.45 | 0.55 | 0.73 |
| F       | 0.77 | 0.56 | 0.63 | 0.60 | 0.49 | 0.53 | 0.32 | 0.00 | 0.29 | 0.25 | 0.51 | 0.63 | 0.33 | 0.58 | 0.62 | 0.54 | 0.59 | 0.57 | 0.66 | 0.80 |
| W       | 0.93 | 0.72 | 0.79 | 0.74 | 0.61 | 0.66 | 0.47 | 0.29 | 0.00 | 0.28 | 0.55 | 0.76 | 0.48 | 0.71 | 0.70 | 0.60 | 0.67 | 0.63 | 0.69 | 0.78 |
| Y       | 0.74 | 0.55 | 0.64 | 0.59 | 0.49 | 0.53 | 0.33 | 0.25 | 0.28 | 0.00 | 0.40 | 0.58 | 0.34 | 0.53 | 0.55 | 0.45 | 0.49 | 0.46 | 0.55 | 0.66 |
| H       | 0.63 | 0.49 | 0.59 | 0.64 | 0.64 | 0.65 | 0.47 | 0.51 | 0.55 | 0.40 | 0.00 | 0.50 | 0.43 | 0.37 | 0.32 | 0.23 | 0.27 | 0.32 | 0.40 | 0.50 |
| T       | 0.34 | 0.29 | 0.62 | 0.31 | 0.41 | 0.39 | 0.42 | 0.63 | 0.76 | 0.58 | 0.50 | 0.00 | 0.50 | 0.37 | 0.57 | 0.52 | 0.37 | 0.34 | 0.41 | 0.61 |
| P       | 0.57 | 0.38 | 0.40 | 0.54 | 0.51 | 0.53 | 0.28 | 0.33 | 0.48 | 0.34 | 0.43 | 0.50 | 0.00 | 0.38 | 0.44 | 0.42 | 0.45 | 0.50 | 0.63 | 0.79 |
| S       | 0.37 | 0.29 | 0.39 | 0.54 | 0.60 | 0.59 | 0.43 | 0.58 | 0.71 | 0.53 | 0.37 | 0.37 | 0.38 | 0.00 | 0.32 | 0.34 | 0.29 | 0.40 | 0.52 | 0.70 |
| D       | 0.58 | 0.49 | 0.45 | 0.74 | 0.77 | 0.77 | 0.55 | 0.62 | 0.70 | 0.55 | 0.32 | 0.57 | 0.44 | 0.32 | 0.00 | 0.25 | 0.33 | 0.48 | 0.58 | 0.70 |
| N       | 0.60 | 0.48 | 0.52 | 0.68 | 0.69 | 0.70 | 0.49 | 0.54 | 0.60 | 0.45 | 0.23 | 0.52 | 0.42 | 0.34 | 0.25 | 0.00 | 0.28 | 0.39 | 0.48 | 0.59 |
| E       | 0.48 | 0.39 | 0.56 | 0.55 | 0.59 | 0.59 | 0.47 | 0.59 | 0.67 | 0.49 | 0.27 | 0.37 | 0.45 | 0.29 | 0.33 | 0.28 | 0.00 | 0.27 | 0.36 | 0.51 |
| Q       | 0.54 | 0.43 | 0.69 | 0.48 | 0.50 | 0.49 | 0.45 | 0.57 | 0.63 | 0.46 | 0.32 | 0.34 | 0.50 | 0.40 | 0.48 | 0.39 | 0.27 | 0.00 | 0.24 | 0.39 |
| K       | 0.63 | 0.55 | 0.82 | 0.54 | 0.55 | 0.55 | 0.55 | 0.66 | 0.69 | 0.55 | 0.40 | 0.41 | 0.63 | 0.52 | 0.58 | 0.48 | 0.36 | 0.24 | 0.00 | 0.30 |
| R       | 0.83 | 0.75 | 1.00 | 0.73 | 0.73 | 0.72 | 0.73 | 0.80 | 0.78 | 0.66 | 0.50 | 0.61 | 0.79 | 0.70 | 0.70 | 0.59 | 0.51 | 0.39 | 0.30 | 0.00 |

**Supporting table S6. Scaled distance matrix Z-Scales (5).**

| Residue | G    | A    | C    | V    | L    | I    | M    | F    | W    | Y    | H    | T    | P    | S    | D    | N    | E    | Q    | K    | R    |
|---------|------|------|------|------|------|------|------|------|------|------|------|------|------|------|------|------|------|------|------|------|
| G       | 0.00 | 0.39 | 0.60 | 0.42 | 0.57 | 0.52 | 0.57 | 0.70 | 0.96 | 0.69 | 0.74 | 0.31 | 0.66 | 0.38 | 0.58 | 0.63 | 0.49 | 0.51 | 0.62 | 0.80 |
| A       | 0.39 | 0.00 | 0.75 | 0.41 | 0.42 | 0.44 | 0.54 | 0.60 | 0.88 | 0.67 | 0.63 | 0.40 | 0.37 | 0.30 | 0.50 | 0.45 | 0.52 | 0.42 | 0.54 | 0.75 |
| C       | 0.60 | 0.75 | 0.00 | 0.78 | 0.88 | 0.84 | 0.57 | 0.65 | 0.80 | 0.61 | 0.79 | 0.68 | 0.84 | 0.66 | 0.73 | 0.85 | 0.71 | 0.84 | 0.89 | 1.00 |
| V       | 0.42 | 0.41 | 0.78 | 0.00 | 0.28 | 0.22 | 0.48 | 0.56 | 0.83 | 0.59 | 0.75 | 0.29 | 0.61 | 0.50 | 0.69 | 0.67 | 0.54 | 0.44 | 0.54 | 0.71 |
| L       | 0.57 | 0.42 | 0.88 | 0.28 | 0.00 | 0.21 | 0.50 | 0.51 | 0.79 | 0.59 | 0.75 | 0.43 | 0.51 | 0.54 | 0.71 | 0.63 | 0.61 | 0.45 | 0.55 | 0.73 |
| I       | 0.52 | 0.44 | 0.84 | 0.22 | 0.21 | 0.00 | 0.48 | 0.52 | 0.79 | 0.56 | 0.75 | 0.37 | 0.58 | 0.54 | 0.72 | 0.67 | 0.58 | 0.45 | 0.54 | 0.71 |
| M       | 0.57 | 0.54 | 0.57 | 0.48 | 0.50 | 0.48 | 0.00 | 0.32 | 0.46 | 0.36 | 0.50 | 0.52 | 0.56 | 0.58 | 0.72 | 0.69 | 0.66 | 0.58 | 0.54 | 0.67 |
| F       | 0.70 | 0.60 | 0.65 | 0.56 | 0.51 | 0.52 | 0.32 | 0.00 | 0.42 | 0.27 | 0.58 | 0.60 | 0.52 | 0.59 | 0.67 | 0.63 | 0.64 | 0.58 | 0.62 | 0.73 |
| W       | 0.96 | 0.88 | 0.80 | 0.83 | 0.79 | 0.79 | 0.46 | 0.42 | 0.00 | 0.43 | 0.57 | 0.86 | 0.78 | 0.88 | 0.94 | 0.88 | 0.91 | 0.83 | 0.72 | 0.75 |
| Y       | 0.69 | 0.67 | 0.61 | 0.59 | 0.59 | 0.56 | 0.36 | 0.27 | 0.43 | 0.00 | 0.59 | 0.57 | 0.65 | 0.61 | 0.66 | 0.66 | 0.58 | 0.56 | 0.59 | 0.66 |
| H       | 0.74 | 0.63 | 0.79 | 0.75 | 0.75 | 0.75 | 0.50 | 0.58 | 0.57 | 0.59 | 0.00 | 0.71 | 0.59 | 0.64 | 0.71 | 0.60 | 0.74 | 0.61 | 0.44 | 0.49 |
| T       | 0.31 | 0.40 | 0.68 | 0.29 | 0.43 | 0.37 | 0.52 | 0.60 | 0.86 | 0.57 | 0.71 | 0.00 | 0.64 | 0.38 | 0.55 | 0.57 | 0.37 | 0.35 | 0.49 | 0.65 |
| P       | 0.66 | 0.37 | 0.84 | 0.61 | 0.51 | 0.58 | 0.56 | 0.52 | 0.78 | 0.65 | 0.59 | 0.64 | 0.00 | 0.45 | 0.55 | 0.42 | 0.66 | 0.54 | 0.63 | 0.81 |
| S       | 0.38 | 0.30 | 0.66 | 0.50 | 0.54 | 0.54 | 0.58 | 0.59 | 0.88 | 0.61 | 0.64 | 0.38 | 0.45 | 0.00 | 0.30 | 0.34 | 0.34 | 0.36 | 0.55 | 0.72 |
| D       | 0.58 | 0.50 | 0.73 | 0.69 | 0.71 | 0.72 | 0.72 | 0.67 | 0.94 | 0.66 | 0.71 | 0.55 | 0.55 | 0.30 | 0.00 | 0.29 | 0.34 | 0.45 | 0.66 | 0.79 |
| N       | 0.63 | 0.45 | 0.85 | 0.67 | 0.63 | 0.67 | 0.69 | 0.63 | 0.88 | 0.66 | 0.60 | 0.57 | 0.42 | 0.34 | 0.29 | 0.00 | 0.44 | 0.38 | 0.55 | 0.68 |
| E       | 0.49 | 0.52 | 0.71 | 0.54 | 0.61 | 0.58 | 0.66 | 0.64 | 0.91 | 0.58 | 0.74 | 0.37 | 0.66 | 0.34 | 0.34 | 0.44 | 0.00 | 0.33 | 0.57 | 0.68 |
| Q       | 0.51 | 0.42 | 0.84 | 0.44 | 0.45 | 0.45 | 0.58 | 0.58 | 0.83 | 0.56 | 0.61 | 0.35 | 0.54 | 0.36 | 0.45 | 0.38 | 0.33 | 0.00 | 0.36 | 0.51 |
| K       | 0.62 | 0.54 | 0.89 | 0.54 | 0.55 | 0.54 | 0.54 | 0.62 | 0.72 | 0.59 | 0.44 | 0.49 | 0.63 | 0.55 | 0.66 | 0.55 | 0.57 | 0.36 | 0.00 | 0.28 |
| R       | 0.80 | 0.75 | 1.00 | 0.71 | 0.73 | 0.71 | 0.67 | 0.73 | 0.75 | 0.66 | 0.49 | 0.65 | 0.81 | 0.72 | 0.79 | 0.68 | 0.68 | 0.51 | 0.28 | 0.00 |

**Supporting table S7. Scaled distance matrix Z-Scales (Binned).**

| Residue | G    | A    | C    | V    | L    | I    | M    | F    | W    | Y    | H    | T    | P    | S    | D    | N    | E    | Q    | K    | R    |
|---------|------|------|------|------|------|------|------|------|------|------|------|------|------|------|------|------|------|------|------|------|
| G       | 0.00 | 0.57 | 0.79 | 0.51 | 0.73 | 0.76 | 0.66 | 0.66 | 0.78 | 0.68 | 0.66 | 0.65 | 0.91 | 0.65 | 0.65 | 0.58 | 0.65 | 0.83 | 0.77 | 0.69 |
| A       | 0.57 | 0.00 | 0.73 | 0.68 | 0.78 | 0.81 | 0.79 | 0.79 | 0.82 | 0.73 | 0.79 | 0.67 | 0.83 | 0.78 | 0.78 | 0.55 | 0.86 | 0.77 | 0.89 | 0.89 |
| C       | 0.79 | 0.73 | 0.00 | 0.87 | 0.78 | 0.80 | 0.71 | 0.69 | 0.69 | 0.67 | 0.80 | 0.79 | 0.86 | 0.69 | 0.79 | 0.81 | 0.87 | 0.78 | 0.79 | 0.90 |
| V       | 0.51 | 0.68 | 0.87 | 0.00 | 0.54 | 0.69 | 0.67 | 0.67 | 0.78 | 0.69 | 0.83 | 0.54 | 0.98 | 0.82 | 0.82 | 0.76 | 0.64 | 0.75 | 0.85 | 0.78 |
| L       | 0.73 | 0.78 | 0.78 | 0.54 | 0.00 | 0.44 | 0.64 | 0.75 | 0.78 | 0.68 | 0.74 | 0.76 | 0.97 | 0.63 | 0.73 | 0.75 | 0.72 | 0.66 | 0.77 | 0.85 |
| I       | 0.76 | 0.81 | 0.80 | 0.69 | 0.44 | 0.00 | 0.67 | 0.77 | 0.80 | 0.70 | 0.77 | 0.87 | 0.99 | 0.65 | 0.75 | 0.78 | 0.84 | 0.78 | 0.64 | 0.74 |
| M       | 0.66 | 0.79 | 0.71 | 0.67 | 0.64 | 0.67 | 0.00 | 0.58 | 0.57 | 0.69 | 0.63 | 0.78 | 0.92 | 0.64 | 0.74 | 0.76 | 0.75 | 0.84 | 0.85 | 0.66 |
| F       | 0.66 | 0.79 | 0.69 | 0.67 | 0.75 | 0.77 | 0.58 | 0.00 | 0.59 | 0.57 | 0.65 | 0.78 | 0.82 | 0.75 | 0.74 | 0.76 | 0.75 | 0.84 | 0.74 | 0.68 |
| W       | 0.78 | 0.82 | 0.69 | 0.78 | 0.78 | 0.80 | 0.57 | 0.59 | 0.00 | 0.40 | 0.55 | 0.88 | 0.94 | 0.78 | 0.77 | 0.79 | 0.85 | 0.87 | 0.88 | 0.68 |
| Y       | 0.68 | 0.73 | 0.67 | 0.69 | 0.68 | 0.70 | 0.69 | 0.57 | 0.40 | 0.00 | 0.67 | 0.87 | 0.93 | 0.76 | 0.75 | 0.70 | 0.84 | 0.85 | 0.86 | 0.78 |
| H       | 0.66 | 0.79 | 0.80 | 0.83 | 0.74 | 0.77 | 0.63 | 0.65 | 0.55 | 0.67 | 0.00 | 0.85 | 0.91 | 0.56 | 0.56 | 0.68 | 0.75 | 0.76 | 0.70 | 0.55 |
| T       | 0.65 | 0.67 | 0.79 | 0.54 | 0.76 | 0.87 | 0.78 | 0.78 | 0.88 | 0.87 | 0.85 | 0.00 | 1.00 | 0.75 | 0.75 | 0.86 | 0.55 | 0.53 | 0.88 | 0.81 |
| P       | 0.91 | 0.83 | 0.86 | 0.98 | 0.97 | 0.99 | 0.92 | 0.82 | 0.94 | 0.93 | 0.91 | 1.00 | 0.00 | 0.91 | 0.83 | 0.71 | 0.90 | 0.92 | 0.83 | 1.00 |
| S       | 0.65 | 0.78 | 0.69 | 0.82 | 0.63 | 0.65 | 0.64 | 0.75 | 0.78 | 0.76 | 0.56 | 0.75 | 0.91 | 0.00 | 0.39 | 0.67 | 0.63 | 0.65 | 0.69 | 0.78 |
| D       | 0.65 | 0.78 | 0.79 | 0.82 | 0.73 | 0.75 | 0.74 | 0.74 | 0.77 | 0.75 | 0.56 | 0.75 | 0.83 | 0.39 | 0.00 | 0.56 | 0.51 | 0.54 | 0.58 | 0.77 |
| N       | 0.58 | 0.55 | 0.81 | 0.76 | 0.75 | 0.78 | 0.76 | 0.76 | 0.79 | 0.70 | 0.68 | 0.86 | 0.71 | 0.67 | 0.56 | 0.00 | 0.67 | 0.77 | 0.70 | 0.79 |
| E       | 0.65 | 0.86 | 0.87 | 0.64 | 0.72 | 0.84 | 0.75 | 0.75 | 0.85 | 0.84 | 0.75 | 0.55 | 0.90 | 0.63 | 0.51 | 0.67 | 0.00 | 0.53 | 0.69 | 0.70 |
| Q       | 0.83 | 0.77 | 0.78 | 0.75 | 0.66 | 0.78 | 0.84 | 0.84 | 0.87 | 0.85 | 0.76 | 0.53 | 0.92 | 0.65 | 0.54 | 0.77 | 0.53 | 0.00 | 0.70 | 0.87 |
| K       | 0.77 | 0.89 | 0.79 | 0.85 | 0.77 | 0.64 | 0.85 | 0.74 | 0.88 | 0.86 | 0.70 | 0.88 | 0.83 | 0.69 | 0.58 | 0.70 | 0.69 | 0.70 | 0.00 | 0.67 |
| R       | 0.69 | 0.89 | 0.90 | 0.78 | 0.85 | 0.74 | 0.66 | 0.68 | 0.68 | 0.78 | 0.55 | 0.81 | 1.00 | 0.78 | 0.77 | 0.79 | 0.70 | 0.87 | 0.67 | 0.00 |

**Supporting table S8. Scaled distance matrix VHSE.**

| Residue | G    | A    | C    | V    | L    | I    | M    | F    | W    | Y    | H    | T    | P    | S    | D    | N    | E    | Q    | K    | R    |
|---------|------|------|------|------|------|------|------|------|------|------|------|------|------|------|------|------|------|------|------|------|
| G       | 0.00 | 0.58 | 0.80 | 0.81 | 0.75 | 0.86 | 0.75 | 0.92 | 1.00 | 0.90 | 0.75 | 0.77 | 0.91 | 0.67 | 0.83 | 0.59 | 0.68 | 0.71 | 0.78 | 0.93 |
| A       | 0.58 | 0.00 | 0.47 | 0.30 | 0.37 | 0.39 | 0.41 | 0.56 | 0.75 | 0.64 | 0.50 | 0.32 | 0.63 | 0.31 | 0.64 | 0.46 | 0.54 | 0.43 | 0.63 | 0.80 |
| C       | 0.80 | 0.47 | 0.00 | 0.52 | 0.56 | 0.59 | 0.34 | 0.46 | 0.71 | 0.58 | 0.48 | 0.34 | 0.71 | 0.31 | 0.61 | 0.49 | 0.64 | 0.41 | 0.69 | 0.78 |
| V       | 0.81 | 0.30 | 0.52 | 0.00 | 0.29 | 0.20 | 0.40 | 0.49 | 0.69 | 0.62 | 0.57 | 0.33 | 0.61 | 0.43 | 0.73 | 0.61 | 0.63 | 0.50 | 0.71 | 0.85 |
| L       | 0.75 | 0.37 | 0.56 | 0.29 | 0.00 | 0.22 | 0.32 | 0.37 | 0.50 | 0.46 | 0.54 | 0.41 | 0.65 | 0.48 | 0.71 | 0.55 | 0.58 | 0.46 | 0.62 | 0.76 |
| I       | 0.86 | 0.39 | 0.59 | 0.20 | 0.22 | 0.00 | 0.40 | 0.44 | 0.60 | 0.56 | 0.60 | 0.40 | 0.63 | 0.51 | 0.76 | 0.64 | 0.65 | 0.53 | 0.70 | 0.84 |
| M       | 0.75 | 0.41 | 0.34 | 0.40 | 0.32 | 0.40 | 0.00 | 0.26 | 0.46 | 0.37 | 0.43 | 0.35 | 0.67 | 0.38 | 0.63 | 0.45 | 0.57 | 0.34 | 0.58 | 0.69 |
| F       | 0.92 | 0.56 | 0.46 | 0.49 | 0.37 | 0.44 | 0.26 | 0.00 | 0.33 | 0.28 | 0.50 | 0.43 | 0.68 | 0.51 | 0.66 | 0.56 | 0.63 | 0.43 | 0.63 | 0.69 |
| W       | 1.00 | 0.75 | 0.71 | 0.69 | 0.50 | 0.60 | 0.46 | 0.33 | 0.00 | 0.23 | 0.63 | 0.66 | 0.84 | 0.72 | 0.80 | 0.65 | 0.73 | 0.55 | 0.64 | 0.66 |
| Y       | 0.90 | 0.64 | 0.58 | 0.62 | 0.46 | 0.56 | 0.37 | 0.28 | 0.23 | 0.00 | 0.49 | 0.52 | 0.74 | 0.56 | 0.65 | 0.50 | 0.60 | 0.39 | 0.52 | 0.54 |
| H       | 0.75 | 0.50 | 0.48 | 0.57 | 0.54 | 0.60 | 0.43 | 0.50 | 0.63 | 0.49 | 0.00 | 0.41 | 0.61 | 0.40 | 0.52 | 0.33 | 0.48 | 0.31 | 0.32 | 0.40 |
| T       | 0.77 | 0.32 | 0.34 | 0.33 | 0.41 | 0.40 | 0.35 | 0.43 | 0.66 | 0.52 | 0.41 | 0.00 | 0.54 | 0.20 | 0.51 | 0.43 | 0.49 | 0.31 | 0.59 | 0.69 |
| P       | 0.91 | 0.63 | 0.71 | 0.61 | 0.65 | 0.63 | 0.67 | 0.68 | 0.84 | 0.74 | 0.61 | 0.54 | 0.00 | 0.59 | 0.73 | 0.74 | 0.68 | 0.65 | 0.74 | 0.78 |
| S       | 0.67 | 0.31 | 0.31 | 0.43 | 0.48 | 0.51 | 0.38 | 0.51 | 0.72 | 0.56 | 0.40 | 0.20 | 0.59 | 0.00 | 0.47 | 0.36 | 0.46 | 0.30 | 0.59 | 0.69 |
| D       | 0.83 | 0.64 | 0.61 | 0.73 | 0.71 | 0.76 | 0.63 | 0.66 | 0.80 | 0.65 | 0.52 | 0.51 | 0.73 | 0.47 | 0.00 | 0.42 | 0.31 | 0.47 | 0.70 | 0.71 |
| N       | 0.59 | 0.46 | 0.49 | 0.61 | 0.55 | 0.64 | 0.45 | 0.56 | 0.65 | 0.50 | 0.33 | 0.43 | 0.74 | 0.36 | 0.42 | 0.00 | 0.34 | 0.25 | 0.42 | 0.52 |
| E       | 0.68 | 0.54 | 0.64 | 0.63 | 0.58 | 0.65 | 0.57 | 0.63 | 0.73 | 0.60 | 0.48 | 0.49 | 0.68 | 0.46 | 0.31 | 0.34 | 0.00 | 0.40 | 0.58 | 0.65 |
| Q       | 0.71 | 0.43 | 0.41 | 0.50 | 0.46 | 0.53 | 0.34 | 0.43 | 0.55 | 0.39 | 0.31 | 0.31 | 0.65 | 0.30 | 0.47 | 0.25 | 0.40 | 0.00 | 0.40 | 0.49 |
| K       | 0.78 | 0.63 | 0.69 | 0.71 | 0.62 | 0.70 | 0.58 | 0.63 | 0.64 | 0.52 | 0.32 | 0.59 | 0.74 | 0.59 | 0.70 | 0.42 | 0.58 | 0.40 | 0.00 | 0.26 |
| R       | 0.93 | 0.80 | 0.78 | 0.85 | 0.76 | 0.84 | 0.69 | 0.69 | 0.66 | 0.54 | 0.40 | 0.69 | 0.78 | 0.69 | 0.71 | 0.52 | 0.65 | 0.49 | 0.26 | 0.00 |

**Supporting table S9. Scaled distance matrix ST-Scales.**

| Residue | G    | A    | C    | V    | L    | I    | M    | F    | W    | Y    | H    | T    | P    | S    | D    | N    | E    | Q    | K    | R    |
|---------|------|------|------|------|------|------|------|------|------|------|------|------|------|------|------|------|------|------|------|------|
| G       | 0.00 | 0.39 | 0.71 | 0.69 | 0.77 | 0.88 | 0.86 | 0.83 | 1.00 | 0.92 | 0.95 | 0.81 | 0.72 | 0.61 | 0.83 | 0.81 | 0.78 | 0.73 | 0.74 | 0.77 |
| A       | 0.39 | 0.00 | 0.52 | 0.41 | 0.56 | 0.59 | 0.73 | 0.73 | 0.83 | 0.85 | 0.77 | 0.49 | 0.48 | 0.37 | 0.61 | 0.58 | 0.62 | 0.56 | 0.61 | 0.69 |
| C       | 0.71 | 0.52 | 0.00 | 0.35 | 0.46 | 0.48 | 0.42 | 0.64 | 0.80 | 0.79 | 0.71 | 0.49 | 0.37 | 0.49 | 0.59 | 0.54 | 0.58 | 0.50 | 0.50 | 0.61 |
| V       | 0.69 | 0.41 | 0.35 | 0.00 | 0.29 | 0.26 | 0.51 | 0.55 | 0.75 | 0.72 | 0.70 | 0.35 | 0.27 | 0.42 | 0.51 | 0.46 | 0.53 | 0.45 | 0.47 | 0.65 |
| L       | 0.77 | 0.56 | 0.46 | 0.29 | 0.00 | 0.26 | 0.39 | 0.37 | 0.65 | 0.55 | 0.60 | 0.47 | 0.31 | 0.51 | 0.49 | 0.43 | 0.43 | 0.36 | 0.32 | 0.56 |
| I       | 0.88 | 0.59 | 0.48 | 0.26 | 0.26 | 0.00 | 0.52 | 0.54 | 0.70 | 0.70 | 0.66 | 0.37 | 0.34 | 0.52 | 0.49 | 0.45 | 0.52 | 0.46 | 0.48 | 0.68 |
| M       | 0.86 | 0.73 | 0.42 | 0.51 | 0.39 | 0.52 | 0.00 | 0.43 | 0.69 | 0.56 | 0.60 | 0.65 | 0.46 | 0.64 | 0.58 | 0.53 | 0.47 | 0.40 | 0.33 | 0.49 |
| F       | 0.83 | 0.73 | 0.64 | 0.55 | 0.37 | 0.54 | 0.43 | 0.00 | 0.59 | 0.36 | 0.64 | 0.73 | 0.49 | 0.73 | 0.69 | 0.64 | 0.56 | 0.49 | 0.37 | 0.56 |
| W       | 1.00 | 0.83 | 0.80 | 0.75 | 0.65 | 0.70 | 0.69 | 0.59 | 0.00 | 0.64 | 0.31 | 0.74 | 0.68 | 0.71 | 0.66 | 0.63 | 0.52 | 0.53 | 0.51 | 0.47 |
| Y       | 0.92 | 0.85 | 0.79 | 0.72 | 0.55 | 0.70 | 0.56 | 0.36 | 0.64 | 0.00 | 0.69 | 0.78 | 0.63 | 0.77 | 0.67 | 0.64 | 0.57 | 0.55 | 0.55 | 0.68 |
| H       | 0.95 | 0.77 | 0.71 | 0.70 | 0.60 | 0.66 | 0.60 | 0.64 | 0.31 | 0.69 | 0.00 | 0.67 | 0.63 | 0.60 | 0.54 | 0.51 | 0.38 | 0.42 | 0.45 | 0.40 |
| T       | 0.81 | 0.49 | 0.49 | 0.35 | 0.47 | 0.37 | 0.65 | 0.73 | 0.74 | 0.78 | 0.67 | 0.00 | 0.42 | 0.30 | 0.34 | 0.33 | 0.49 | 0.46 | 0.61 | 0.74 |
| P       | 0.72 | 0.48 | 0.37 | 0.27 | 0.31 | 0.34 | 0.46 | 0.49 | 0.68 | 0.63 | 0.63 | 0.42 | 0.00 | 0.45 | 0.54 | 0.49 | 0.52 | 0.46 | 0.45 | 0.61 |
| S       | 0.61 | 0.37 | 0.49 | 0.42 | 0.51 | 0.52 | 0.64 | 0.73 | 0.71 | 0.77 | 0.60 | 0.30 | 0.45 | 0.00 | 0.32 | 0.31 | 0.40 | 0.39 | 0.55 | 0.62 |
| D       | 0.83 | 0.61 | 0.59 | 0.51 | 0.49 | 0.49 | 0.58 | 0.69 | 0.66 | 0.67 | 0.54 | 0.34 | 0.54 | 0.32 | 0.00 | 0.15 | 0.28 | 0.31 | 0.53 | 0.62 |
| N       | 0.81 | 0.58 | 0.54 | 0.46 | 0.43 | 0.45 | 0.53 | 0.64 | 0.63 | 0.64 | 0.51 | 0.33 | 0.49 | 0.31 | 0.15 | 0.00 | 0.25 | 0.26 | 0.47 | 0.58 |
| E       | 0.78 | 0.62 | 0.58 | 0.53 | 0.43 | 0.52 | 0.47 | 0.56 | 0.52 | 0.57 | 0.38 | 0.49 | 0.52 | 0.40 | 0.28 | 0.25 | 0.00 | 0.17 | 0.35 | 0.42 |
| Q       | 0.73 | 0.56 | 0.50 | 0.45 | 0.36 | 0.46 | 0.40 | 0.49 | 0.53 | 0.55 | 0.42 | 0.46 | 0.46 | 0.39 | 0.31 | 0.26 | 0.17 | 0.00 | 0.28 | 0.39 |
| K       | 0.74 | 0.61 | 0.50 | 0.47 | 0.32 | 0.48 | 0.33 | 0.37 | 0.51 | 0.55 | 0.45 | 0.61 | 0.45 | 0.55 | 0.53 | 0.47 | 0.35 | 0.28 | 0.00 | 0.30 |
| R       | 0.77 | 0.69 | 0.61 | 0.65 | 0.56 | 0.68 | 0.49 | 0.56 | 0.47 | 0.68 | 0.40 | 0.74 | 0.61 | 0.62 | 0.62 | 0.58 | 0.42 | 0.39 | 0.30 | 0.00 |

**Supporting table S10. Scaled distance matrix T-Scales.**

| Residue | G    | A    | C    | V    | L    | I    | M    | F    | W    | Y    | H    | T    | P    | S    | D    | N    | E    | Q    | K    | R    |
|---------|------|------|------|------|------|------|------|------|------|------|------|------|------|------|------|------|------|------|------|------|
| G       | 0.00 | 0.27 | 0.41 | 0.51 | 0.61 | 0.63 | 0.83 | 0.81 | 1.00 | 0.86 | 0.78 | 0.49 | 0.68 | 0.39 | 0.57 | 0.56 | 0.66 | 0.66 | 0.78 | 0.88 |
| A       | 0.27 | 0.00 | 0.32 | 0.36 | 0.51 | 0.50 | 0.79 | 0.72 | 0.90 | 0.76 | 0.68 | 0.33 | 0.57 | 0.28 | 0.45 | 0.43 | 0.57 | 0.56 | 0.74 | 0.83 |
| C       | 0.41 | 0.32 | 0.00 | 0.22 | 0.29 | 0.29 | 0.53 | 0.52 | 0.75 | 0.59 | 0.52 | 0.31 | 0.40 | 0.29 | 0.42 | 0.38 | 0.43 | 0.40 | 0.49 | 0.62 |
| V       | 0.51 | 0.36 | 0.22 | 0.00 | 0.26 | 0.23 | 0.55 | 0.51 | 0.71 | 0.56 | 0.51 | 0.25 | 0.40 | 0.31 | 0.38 | 0.34 | 0.40 | 0.38 | 0.52 | 0.63 |
| L       | 0.61 | 0.51 | 0.29 | 0.26 | 0.00 | 0.18 | 0.38 | 0.49 | 0.73 | 0.56 | 0.54 | 0.40 | 0.47 | 0.45 | 0.48 | 0.43 | 0.41 | 0.37 | 0.36 | 0.50 |
| I       | 0.63 | 0.50 | 0.29 | 0.23 | 0.18 | 0.00 | 0.43 | 0.47 | 0.69 | 0.54 | 0.52 | 0.37 | 0.43 | 0.44 | 0.46 | 0.41 | 0.41 | 0.37 | 0.42 | 0.55 |
| M       | 0.83 | 0.79 | 0.53 | 0.55 | 0.38 | 0.43 | 0.00 | 0.60 | 0.85 | 0.71 | 0.71 | 0.72 | 0.62 | 0.73 | 0.78 | 0.73 | 0.64 | 0.59 | 0.31 | 0.52 |
| F       | 0.81 | 0.72 | 0.52 | 0.51 | 0.49 | 0.47 | 0.60 | 0.00 | 0.34 | 0.22 | 0.22 | 0.53 | 0.39 | 0.55 | 0.53 | 0.50 | 0.42 | 0.40 | 0.47 | 0.50 |
| W       | 1.00 | 0.90 | 0.75 | 0.71 | 0.73 | 0.69 | 0.85 | 0.34 | 0.00 | 0.30 | 0.35 | 0.70 | 0.54 | 0.74 | 0.69 | 0.68 | 0.63 | 0.62 | 0.74 | 0.73 |
| Y       | 0.86 | 0.76 | 0.59 | 0.56 | 0.56 | 0.54 | 0.71 | 0.22 | 0.30 | 0.00 | 0.22 | 0.54 | 0.49 | 0.57 | 0.50 | 0.48 | 0.40 | 0.39 | 0.56 | 0.52 |
| H       | 0.78 | 0.68 | 0.52 | 0.51 | 0.54 | 0.52 | 0.71 | 0.22 | 0.35 | 0.22 | 0.00 | 0.48 | 0.38 | 0.50 | 0.47 | 0.45 | 0.40 | 0.40 | 0.57 | 0.58 |
| T       | 0.49 | 0.33 | 0.31 | 0.25 | 0.40 | 0.37 | 0.72 | 0.53 | 0.70 | 0.54 | 0.48 | 0.00 | 0.47 | 0.22 | 0.24 | 0.22 | 0.35 | 0.35 | 0.62 | 0.67 |
| P       | 0.68 | 0.57 | 0.40 | 0.40 | 0.47 | 0.43 | 0.62 | 0.39 | 0.54 | 0.49 | 0.38 | 0.47 | 0.00 | 0.48 | 0.57 | 0.54 | 0.56 | 0.54 | 0.61 | 0.74 |
| S       | 0.39 | 0.28 | 0.29 | 0.31 | 0.45 | 0.44 | 0.73 | 0.55 | 0.74 | 0.57 | 0.50 | 0.22 | 0.48 | 0.00 | 0.28 | 0.26 | 0.38 | 0.39 | 0.62 | 0.68 |
| D       | 0.57 | 0.45 | 0.42 | 0.38 | 0.48 | 0.46 | 0.78 | 0.53 | 0.69 | 0.50 | 0.47 | 0.24 | 0.57 | 0.28 | 0.00 | 0.16 | 0.27 | 0.29 | 0.62 | 0.61 |
| N       | 0.56 | 0.43 | 0.38 | 0.34 | 0.43 | 0.41 | 0.73 | 0.50 | 0.68 | 0.48 | 0.45 | 0.22 | 0.54 | 0.26 | 0.16 | 0.00 | 0.25 | 0.26 | 0.58 | 0.58 |
| E       | 0.66 | 0.57 | 0.43 | 0.40 | 0.41 | 0.41 | 0.64 | 0.42 | 0.63 | 0.40 | 0.40 | 0.35 | 0.56 | 0.38 | 0.27 | 0.25 | 0.00 | 0.16 | 0.45 | 0.41 |
| Q       | 0.66 | 0.56 | 0.40 | 0.38 | 0.37 | 0.37 | 0.59 | 0.40 | 0.62 | 0.39 | 0.40 | 0.35 | 0.54 | 0.39 | 0.29 | 0.26 | 0.16 | 0.00 | 0.40 | 0.38 |
| K       | 0.78 | 0.74 | 0.49 | 0.52 | 0.36 | 0.42 | 0.31 | 0.47 | 0.74 | 0.56 | 0.57 | 0.62 | 0.61 | 0.62 | 0.62 | 0.58 | 0.45 | 0.40 | 0.00 | 0.28 |
| R       | 0.88 | 0.83 | 0.62 | 0.63 | 0.50 | 0.55 | 0.52 | 0.50 | 0.73 | 0.52 | 0.58 | 0.67 | 0.74 | 0.68 | 0.61 | 0.58 | 0.41 | 0.38 | 0.28 | 0.00 |

**Supporting table S11. Scaled distance matrix MSWHIM.**

| Residue | G    | A    | C    | V    | L    | I    | M    | F    | W    | Y    | H    | T    | P    | S    | D    | N    | E    | Q    | K    | R    |
|---------|------|------|------|------|------|------|------|------|------|------|------|------|------|------|------|------|------|------|------|------|
| G       | 0.00 | 0.31 | 0.38 | 0.52 | 0.53 | 0.56 | 0.59 | 0.62 | 0.69 | 0.64 | 0.56 | 0.50 | 0.45 | 0.45 | 0.39 | 0.32 | 0.41 | 0.61 | 0.63 | 0.80 |
| A       | 0.31 | 0.00 | 0.26 | 0.32 | 0.35 | 0.36 | 0.40 | 0.59 | 0.67 | 0.64 | 0.58 | 0.35 | 0.31 | 0.31 | 0.60 | 0.34 | 0.50 | 0.52 | 0.56 | 0.74 |
| C       | 0.38 | 0.26 | 0.00 | 0.34 | 0.28 | 0.31 | 0.36 | 0.55 | 0.64 | 0.58 | 0.59 | 0.41 | 0.32 | 0.40 | 0.66 | 0.37 | 0.45 | 0.47 | 0.43 | 0.60 |
| V       | 0.52 | 0.32 | 0.34 | 0.00 | 0.29 | 0.25 | 0.26 | 0.61 | 0.67 | 0.69 | 0.63 | 0.28 | 0.27 | 0.29 | 0.83 | 0.48 | 0.68 | 0.48 | 0.63 | 0.77 |
| L       | 0.53 | 0.35 | 0.28 | 0.29 | 0.00 | 0.22 | 0.24 | 0.53 | 0.61 | 0.58 | 0.60 | 0.38 | 0.29 | 0.41 | 0.83 | 0.46 | 0.58 | 0.41 | 0.46 | 0.59 |
| I       | 0.56 | 0.36 | 0.31 | 0.25 | 0.22 | 0.00 | 0.23 | 0.57 | 0.65 | 0.64 | 0.64 | 0.36 | 0.30 | 0.39 | 0.87 | 0.50 | 0.64 | 0.44 | 0.53 | 0.65 |
| M       | 0.59 | 0.40 | 0.36 | 0.26 | 0.24 | 0.23 | 0.00 | 0.51 | 0.58 | 0.59 | 0.58 | 0.33 | 0.27 | 0.39 | 0.90 | 0.48 | 0.67 | 0.38 | 0.57 | 0.68 |
| F       | 0.62 | 0.59 | 0.55 | 0.61 | 0.53 | 0.57 | 0.51 | 0.00 | 0.23 | 0.24 | 0.29 | 0.53 | 0.45 | 0.61 | 0.83 | 0.41 | 0.57 | 0.26 | 0.68 | 0.72 |
| W       | 0.69 | 0.67 | 0.64 | 0.67 | 0.61 | 0.65 | 0.58 | 0.23 | 0.00 | 0.27 | 0.28 | 0.57 | 0.51 | 0.67 | 0.88 | 0.47 | 0.65 | 0.31 | 0.78 | 0.81 |
| Y       | 0.64 | 0.64 | 0.58 | 0.69 | 0.58 | 0.64 | 0.59 | 0.24 | 0.27 | 0.00 | 0.34 | 0.62 | 0.53 | 0.70 | 0.81 | 0.44 | 0.52 | 0.33 | 0.65 | 0.67 |
| H       | 0.56 | 0.58 | 0.59 | 0.63 | 0.60 | 0.64 | 0.58 | 0.29 | 0.28 | 0.34 | 0.00 | 0.50 | 0.46 | 0.57 | 0.73 | 0.36 | 0.59 | 0.36 | 0.79 | 0.87 |
| T       | 0.50 | 0.35 | 0.41 | 0.28 | 0.38 | 0.36 | 0.33 | 0.53 | 0.57 | 0.62 | 0.50 | 0.00 | 0.25 | 0.24 | 0.79 | 0.41 | 0.69 | 0.43 | 0.73 | 0.87 |
| P       | 0.45 | 0.31 | 0.32 | 0.27 | 0.29 | 0.30 | 0.27 | 0.45 | 0.51 | 0.53 | 0.46 | 0.25 | 0.00 | 0.30 | 0.75 | 0.35 | 0.58 | 0.35 | 0.61 | 0.74 |
| S       | 0.45 | 0.31 | 0.40 | 0.29 | 0.41 | 0.39 | 0.39 | 0.61 | 0.67 | 0.70 | 0.57 | 0.24 | 0.30 | 0.00 | 0.73 | 0.42 | 0.69 | 0.53 | 0.75 | 0.91 |
| D       | 0.39 | 0.60 | 0.66 | 0.83 | 0.83 | 0.87 | 0.90 | 0.83 | 0.88 | 0.81 | 0.73 | 0.79 | 0.75 | 0.73 | 0.00 | 0.53 | 0.50 | 0.86 | 0.84 | 1.00 |
| N       | 0.32 | 0.34 | 0.37 | 0.48 | 0.46 | 0.50 | 0.48 | 0.41 | 0.47 | 0.44 | 0.36 | 0.41 | 0.35 | 0.42 | 0.53 | 0.00 | 0.41 | 0.41 | 0.61 | 0.75 |
| E       | 0.41 | 0.50 | 0.45 | 0.68 | 0.58 | 0.64 | 0.67 | 0.57 | 0.65 | 0.52 | 0.59 | 0.69 | 0.58 | 0.69 | 0.50 | 0.41 | 0.00 | 0.60 | 0.46 | 0.57 |
| Q       | 0.61 | 0.52 | 0.47 | 0.48 | 0.41 | 0.44 | 0.38 | 0.26 | 0.31 | 0.33 | 0.36 | 0.43 | 0.35 | 0.53 | 0.86 | 0.41 | 0.60 | 0.00 | 0.62 | 0.68 |
| K       | 0.63 | 0.56 | 0.43 | 0.63 | 0.46 | 0.53 | 0.57 | 0.68 | 0.78 | 0.65 | 0.79 | 0.73 | 0.61 | 0.75 | 0.84 | 0.61 | 0.46 | 0.62 | 0.00 | 0.29 |
| R       | 0.80 | 0.74 | 0.60 | 0.77 | 0.59 | 0.65 | 0.68 | 0.72 | 0.81 | 0.67 | 0.87 | 0.87 | 0.74 | 0.91 | 1.00 | 0.75 | 0.57 | 0.68 | 0.29 | 0.00 |

**Supporting table S12. Scaled distance matrix FASGAI.**

| Residue | G    | A    | C    | V    | L    | I    | M    | F    | W    | Y    | H    | T    | P    | S    | D    | N    | E    | Q    | K    | R    |
|---------|------|------|------|------|------|------|------|------|------|------|------|------|------|------|------|------|------|------|------|------|
| G       | 0.00 | 0.57 | 0.75 | 0.72 | 0.79 | 0.75 | 0.82 | 0.77 | 0.86 | 0.72 | 0.74 | 0.53 | 0.87 | 0.40 | 0.50 | 0.46 | 0.73 | 0.67 | 0.74 | 0.92 |
| A       | 0.57 | 0.00 | 0.66 | 0.41 | 0.39 | 0.45 | 0.48 | 0.52 | 0.73 | 0.66 | 0.53 | 0.37 | 0.84 | 0.37 | 0.48 | 0.50 | 0.40 | 0.45 | 0.50 | 0.72 |
| C       | 0.75 | 0.66 | 0.00 | 0.60 | 0.81 | 0.62 | 0.47 | 0.60 | 0.62 | 0.63 | 0.39 | 0.50 | 0.97 | 0.57 | 0.65 | 0.54 | 0.72 | 0.51 | 0.66 | 0.70 |
| V       | 0.72 | 0.41 | 0.60 | 0.00 | 0.35 | 0.23 | 0.44 | 0.36 | 0.60 | 0.52 | 0.52 | 0.36 | 0.94 | 0.49 | 0.70 | 0.60 | 0.64 | 0.47 | 0.49 | 0.57 |
| L       | 0.79 | 0.39 | 0.81 | 0.35 | 0.00 | 0.31 | 0.50 | 0.40 | 0.67 | 0.62 | 0.64 | 0.51 | 0.91 | 0.58 | 0.71 | 0.69 | 0.58 | 0.58 | 0.58 | 0.75 |
| I       | 0.75 | 0.45 | 0.62 | 0.23 | 0.31 | 0.00 | 0.38 | 0.24 | 0.48 | 0.43 | 0.50 | 0.42 | 0.92 | 0.53 | 0.68 | 0.60 | 0.63 | 0.49 | 0.52 | 0.63 |
| M       | 0.82 | 0.48 | 0.47 | 0.44 | 0.50 | 0.38 | 0.00 | 0.33 | 0.43 | 0.50 | 0.31 | 0.46 | 0.90 | 0.56 | 0.58 | 0.54 | 0.48 | 0.39 | 0.52 | 0.64 |
| F       | 0.77 | 0.52 | 0.60 | 0.36 | 0.40 | 0.24 | 0.33 | 0.00 | 0.34 | 0.34 | 0.43 | 0.44 | 0.87 | 0.55 | 0.63 | 0.55 | 0.60 | 0.45 | 0.53 | 0.64 |
| W       | 0.86 | 0.73 | 0.62 | 0.60 | 0.67 | 0.48 | 0.43 | 0.34 | 0.00 | 0.29 | 0.45 | 0.60 | 0.99 | 0.69 | 0.66 | 0.57 | 0.70 | 0.53 | 0.63 | 0.71 |
| Y       | 0.72 | 0.66 | 0.63 | 0.52 | 0.62 | 0.43 | 0.50 | 0.34 | 0.29 | 0.00 | 0.45 | 0.47 | 0.92 | 0.56 | 0.61 | 0.47 | 0.69 | 0.45 | 0.51 | 0.59 |
| H       | 0.74 | 0.53 | 0.39 | 0.52 | 0.64 | 0.50 | 0.31 | 0.43 | 0.45 | 0.45 | 0.00 | 0.38 | 0.82 | 0.46 | 0.47 | 0.38 | 0.46 | 0.25 | 0.41 | 0.51 |
| T       | 0.53 | 0.37 | 0.50 | 0.36 | 0.51 | 0.42 | 0.46 | 0.44 | 0.60 | 0.47 | 0.38 | 0.00 | 0.73 | 0.23 | 0.47 | 0.35 | 0.51 | 0.30 | 0.37 | 0.50 |
| P       | 0.87 | 0.84 | 0.97 | 0.94 | 0.91 | 0.92 | 0.90 | 0.87 | 0.99 | 0.92 | 0.82 | 0.73 | 0.00 | 0.70 | 0.76 | 0.76 | 0.82 | 0.80 | 0.90 | 1.00 |
| S       | 0.40 | 0.37 | 0.57 | 0.49 | 0.58 | 0.53 | 0.56 | 0.55 | 0.69 | 0.56 | 0.46 | 0.23 | 0.70 | 0.00 | 0.38 | 0.29 | 0.49 | 0.36 | 0.44 | 0.61 |
| D       | 0.50 | 0.48 | 0.65 | 0.70 | 0.71 | 0.68 | 0.58 | 0.63 | 0.66 | 0.61 | 0.47 | 0.47 | 0.76 | 0.38 | 0.00 | 0.27 | 0.37 | 0.43 | 0.55 | 0.78 |
| N       | 0.46 | 0.50 | 0.54 | 0.60 | 0.69 | 0.60 | 0.54 | 0.55 | 0.57 | 0.47 | 0.38 | 0.35 | 0.76 | 0.29 | 0.27 | 0.00 | 0.47 | 0.33 | 0.45 | 0.63 |
| E       | 0.73 | 0.40 | 0.72 | 0.64 | 0.58 | 0.63 | 0.48 | 0.60 | 0.70 | 0.69 | 0.46 | 0.51 | 0.82 | 0.49 | 0.37 | 0.47 | 0.00 | 0.39 | 0.47 | 0.72 |
| Q       | 0.67 | 0.45 | 0.51 | 0.47 | 0.58 | 0.49 | 0.39 | 0.45 | 0.53 | 0.45 | 0.25 | 0.30 | 0.80 | 0.36 | 0.43 | 0.33 | 0.39 | 0.00 | 0.26 | 0.42 |
| K       | 0.74 | 0.50 | 0.66 | 0.49 | 0.58 | 0.52 | 0.52 | 0.53 | 0.63 | 0.51 | 0.41 | 0.37 | 0.90 | 0.44 | 0.55 | 0.45 | 0.47 | 0.26 | 0.00 | 0.32 |
| R       | 0.92 | 0.72 | 0.70 | 0.57 | 0.75 | 0.63 | 0.64 | 0.64 | 0.71 | 0.59 | 0.51 | 0.50 | 1.00 | 0.61 | 0.78 | 0.63 | 0.72 | 0.42 | 0.32 | 0.00 |



**Supporting table S13. Scaled distance matrix BLOSUM.**

| Residue | G    | A    | C    | V    | L    | I    | M    | F    | W    | Y    | H    | T    | P    | S    | D    | N    | E    | Q    | K    | R    |
|---------|------|------|------|------|------|------|------|------|------|------|------|------|------|------|------|------|------|------|------|------|
| G       | 0.00 | 0.66 | 0.99 | 0.75 | 0.77 | 0.77 | 0.77 | 0.85 | 0.89 | 0.87 | 0.89 | 0.97 | 0.95 | 0.70 | 0.84 | 0.77 | 0.84 | 0.82 | 0.82 | 0.79 |
| A       | 0.66 | 0.00 | 0.81 | 0.52 | 0.66 | 0.64 | 0.68 | 0.77 | 0.90 | 0.65 | 0.81 | 0.70 | 0.87 | 0.43 | 0.85 | 0.88 | 0.61 | 0.59 | 0.66 | 0.70 |
| C       | 0.99 | 0.81 | 0.00 | 0.84 | 0.78 | 0.81 | 0.81 | 0.92 | 0.96 | 0.87 | 0.92 | 0.93 | 1.00 | 0.78 | 0.87 | 0.91 | 0.89 | 0.84 | 0.85 | 0.83 |
| V       | 0.75 | 0.52 | 0.84 | 0.00 | 0.36 | 0.26 | 0.39 | 0.72 | 0.83 | 0.64 | 0.73 | 0.66 | 0.79 | 0.55 | 0.72 | 0.75 | 0.57 | 0.53 | 0.70 | 0.72 |
| L       | 0.77 | 0.66 | 0.78 | 0.36 | 0.00 | 0.27 | 0.23 | 0.62 | 0.78 | 0.64 | 0.77 | 0.70 | 0.80 | 0.60 | 0.73 | 0.64 | 0.66 | 0.57 | 0.56 | 0.54 |
| I       | 0.77 | 0.64 | 0.81 | 0.26 | 0.27 | 0.00 | 0.35 | 0.63 | 0.85 | 0.64 | 0.75 | 0.71 | 0.82 | 0.60 | 0.67 | 0.67 | 0.63 | 0.61 | 0.69 | 0.70 |
| M       | 0.77 | 0.68 | 0.81 | 0.39 | 0.23 | 0.35 | 0.00 | 0.73 | 0.72 | 0.69 | 0.74 | 0.72 | 0.83 | 0.64 | 0.75 | 0.64 | 0.63 | 0.49 | 0.57 | 0.52 |
| F       | 0.85 | 0.77 | 0.92 | 0.72 | 0.62 | 0.63 | 0.73 | 0.00 | 0.88 | 0.45 | 0.91 | 0.84 | 0.93 | 0.66 | 0.74 | 0.80 | 0.76 | 0.83 | 0.65 | 0.73 |
| W       | 0.89 | 0.90 | 0.96 | 0.83 | 0.78 | 0.85 | 0.72 | 0.88 | 0.00 | 0.78 | 0.95 | 0.84 | 0.98 | 0.82 | 0.91 | 0.90 | 0.82 | 0.73 | 0.86 | 0.86 |
| Y       | 0.87 | 0.65 | 0.87 | 0.64 | 0.64 | 0.64 | 0.69 | 0.45 | 0.78 | 0.00 | 0.60 | 0.76 | 0.85 | 0.60 | 0.79 | 0.80 | 0.65 | 0.66 | 0.67 | 0.69 |
| H       | 0.89 | 0.81 | 0.92 | 0.73 | 0.77 | 0.75 | 0.74 | 0.91 | 0.95 | 0.60 | 0.00 | 0.90 | 0.92 | 0.76 | 0.90 | 0.71 | 0.77 | 0.67 | 0.86 | 0.77 |
| T       | 0.97 | 0.70 | 0.93 | 0.66 | 0.70 | 0.71 | 0.72 | 0.84 | 0.84 | 0.76 | 0.90 | 0.00 | 0.88 | 0.42 | 0.85 | 0.67 | 0.77 | 0.74 | 0.76 | 0.80 |
| P       | 0.95 | 0.87 | 1.00 | 0.79 | 0.80 | 0.82 | 0.83 | 0.93 | 0.98 | 0.85 | 0.92 | 0.88 | 0.00 | 0.84 | 0.88 | 0.93 | 0.87 | 0.85 | 0.80 | 0.85 |
| S       | 0.70 | 0.43 | 0.78 | 0.55 | 0.60 | 0.60 | 0.64 | 0.66 | 0.82 | 0.60 | 0.76 | 0.42 | 0.84 | 0.00 | 0.68 | 0.59 | 0.57 | 0.57 | 0.56 | 0.61 |
| D       | 0.84 | 0.85 | 0.87 | 0.72 | 0.73 | 0.67 | 0.75 | 0.74 | 0.91 | 0.79 | 0.90 | 0.85 | 0.88 | 0.68 | 0.00 | 0.69 | 0.49 | 0.68 | 0.75 | 0.85 |
| N       | 0.77 | 0.88 | 0.91 | 0.75 | 0.64 | 0.67 | 0.64 | 0.80 | 0.90 | 0.80 | 0.71 | 0.67 | 0.93 | 0.59 | 0.69 | 0.00 | 0.80 | 0.75 | 0.71 | 0.65 |
| E       | 0.84 | 0.61 | 0.89 | 0.57 | 0.66 | 0.63 | 0.63 | 0.76 | 0.82 | 0.65 | 0.77 | 0.77 | 0.87 | 0.57 | 0.49 | 0.80 | 0.00 | 0.33 | 0.59 | 0.68 |
| Q       | 0.82 | 0.59 | 0.84 | 0.53 | 0.57 | 0.61 | 0.49 | 0.83 | 0.73 | 0.66 | 0.67 | 0.74 | 0.85 | 0.57 | 0.68 | 0.75 | 0.33 | 0.00 | 0.53 | 0.54 |
| K       | 0.82 | 0.66 | 0.85 | 0.70 | 0.56 | 0.69 | 0.57 | 0.65 | 0.86 | 0.67 | 0.86 | 0.76 | 0.80 | 0.56 | 0.75 | 0.71 | 0.59 | 0.53 | 0.00 | 0.27 |
| R       | 0.79 | 0.70 | 0.83 | 0.72 | 0.54 | 0.70 | 0.52 | 0.73 | 0.86 | 0.69 | 0.77 | 0.80 | 0.85 | 0.61 | 0.85 | 0.65 | 0.68 | 0.54 | 0.27 | 0.00 |

**Supporting table S14. Scaled distance matrix ProtFP\_PCA using 2 PCs.**

| Residue | A    | R    | Q    | F    | Y    | W    | S    | H    | G    | K    | P    | E    | D    | T    | C    | M    | L    | I    | N    | V    |
|---------|------|------|------|------|------|------|------|------|------|------|------|------|------|------|------|------|------|------|------|------|
| A       | 0.00 | 0.64 | 0.47 | 0.49 | 0.50 | 0.66 | 0.27 | 0.38 | 0.35 | 0.59 | 0.24 | 0.47 | 0.47 | 0.20 | 0.28 | 0.39 | 0.38 | 0.40 | 0.40 | 0.30 |
| R       | 0.64 | 0.00 | 0.21 | 0.60 | 0.36 | 0.56 | 0.51 | 0.29 | 0.84 | 0.14 | 0.48 | 0.27 | 0.37 | 0.45 | 0.68 | 0.54 | 0.63 | 0.67 | 0.34 | 0.66 |
| Q       | 0.47 | 0.21 | 0.00 | 0.59 | 0.39 | 0.62 | 0.30 | 0.23 | 0.63 | 0.13 | 0.28 | 0.07 | 0.18 | 0.27 | 0.58 | 0.51 | 0.57 | 0.62 | 0.13 | 0.58 |
| F       | 0.49 | 0.60 | 0.59 | 0.00 | 0.24 | 0.20 | 0.65 | 0.36 | 0.84 | 0.67 | 0.59 | 0.65 | 0.73 | 0.50 | 0.26 | 0.11 | 0.13 | 0.14 | 0.64 | 0.23 |
| Y       | 0.50 | 0.36 | 0.39 | 0.24 | 0.00 | 0.23 | 0.54 | 0.18 | 0.81 | 0.44 | 0.49 | 0.46 | 0.55 | 0.41 | 0.39 | 0.21 | 0.30 | 0.34 | 0.47 | 0.36 |
| W       | 0.66 | 0.56 | 0.62 | 0.20 | 0.23 | 0.00 | 0.76 | 0.41 | 1.00 | 0.67 | 0.71 | 0.69 | 0.79 | 0.62 | 0.46 | 0.27 | 0.33 | 0.35 | 0.70 | 0.43 |
| S       | 0.27 | 0.51 | 0.30 | 0.65 | 0.54 | 0.76 | 0.00 | 0.37 | 0.33 | 0.41 | 0.06 | 0.26 | 0.22 | 0.15 | 0.51 | 0.54 | 0.57 | 0.60 | 0.18 | 0.52 |
| H       | 0.38 | 0.29 | 0.23 | 0.36 | 0.18 | 0.41 | 0.37 | 0.00 | 0.66 | 0.32 | 0.32 | 0.29 | 0.38 | 0.24 | 0.39 | 0.28 | 0.36 | 0.40 | 0.29 | 0.38 |
| G       | 0.35 | 0.84 | 0.63 | 0.84 | 0.81 | 1.00 | 0.33 | 0.66 | 0.00 | 0.74 | 0.36 | 0.58 | 0.52 | 0.41 | 0.62 | 0.74 | 0.73 | 0.74 | 0.51 | 0.65 |
| K       | 0.59 | 0.14 | 0.13 | 0.67 | 0.44 | 0.67 | 0.41 | 0.32 | 0.74 | 0.00 | 0.40 | 0.15 | 0.24 | 0.40 | 0.69 | 0.59 | 0.67 | 0.71 | 0.23 | 0.68 |
| P       | 0.24 | 0.48 | 0.28 | 0.59 | 0.49 | 0.71 | 0.06 | 0.32 | 0.36 | 0.40 | 0.00 | 0.25 | 0.24 | 0.09 | 0.46 | 0.49 | 0.52 | 0.55 | 0.18 | 0.47 |
| E       | 0.47 | 0.27 | 0.07 | 0.65 | 0.46 | 0.69 | 0.26 | 0.29 | 0.58 | 0.15 | 0.25 | 0.00 | 0.11 | 0.27 | 0.62 | 0.56 | 0.62 | 0.66 | 0.08 | 0.61 |
| D       | 0.47 | 0.37 | 0.18 | 0.73 | 0.55 | 0.79 | 0.22 | 0.38 | 0.52 | 0.24 | 0.24 | 0.11 | 0.00 | 0.29 | 0.66 | 0.63 | 0.68 | 0.72 | 0.09 | 0.66 |
| T       | 0.20 | 0.45 | 0.27 | 0.50 | 0.41 | 0.62 | 0.15 | 0.24 | 0.41 | 0.40 | 0.09 | 0.27 | 0.29 | 0.00 | 0.38 | 0.39 | 0.43 | 0.46 | 0.21 | 0.39 |
| C       | 0.28 | 0.68 | 0.58 | 0.26 | 0.39 | 0.46 | 0.51 | 0.39 | 0.62 | 0.69 | 0.46 | 0.62 | 0.66 | 0.38 | 0.00 | 0.20 | 0.13 | 0.13 | 0.58 | 0.03 |
| M       | 0.39 | 0.54 | 0.51 | 0.11 | 0.21 | 0.27 | 0.54 | 0.28 | 0.74 | 0.59 | 0.49 | 0.56 | 0.63 | 0.39 | 0.20 | 0.00 | 0.09 | 0.13 | 0.54 | 0.17 |
| L       | 0.38 | 0.63 | 0.57 | 0.13 | 0.30 | 0.33 | 0.57 | 0.36 | 0.73 | 0.67 | 0.52 | 0.62 | 0.68 | 0.43 | 0.13 | 0.09 | 0.00 | 0.04 | 0.60 | 0.10 |
| I       | 0.40 | 0.67 | 0.62 | 0.14 | 0.34 | 0.35 | 0.60 | 0.40 | 0.74 | 0.71 | 0.55 | 0.66 | 0.72 | 0.46 | 0.13 | 0.13 | 0.04 | 0.00 | 0.63 | 0.10 |
| N       | 0.40 | 0.34 | 0.13 | 0.64 | 0.47 | 0.70 | 0.18 | 0.29 | 0.51 | 0.23 | 0.18 | 0.08 | 0.09 | 0.21 | 0.58 | 0.54 | 0.60 | 0.63 | 0.00 | 0.58 |
| V       | 0.30 | 0.66 | 0.58 | 0.23 | 0.36 | 0.43 | 0.52 | 0.38 | 0.65 | 0.68 | 0.47 | 0.61 | 0.66 | 0.39 | 0.03 | 0.17 | 0.10 | 0.10 | 0.58 | 0.00 |

**Supporting table S15. Scaled distance matrix Z-Scales using 2 PCs.**

| Residue | A    | R    | Q    | F    | Y    | W    | S    | H    | G    | K    | P    | E    | D    | T    | C    | M    | L    | I    | N    | V    |
|---------|------|------|------|------|------|------|------|------|------|------|------|------|------|------|------|------|------|------|------|------|
| A       | 0.00 | 0.57 | 0.31 | 0.60 | 0.54 | 0.76 | 0.24 | 0.47 | 0.24 | 0.37 | 0.31 | 0.38 | 0.48 | 0.05 | 0.09 | 0.36 | 0.45 | 0.41 | 0.47 | 0.28 |
| R       | 0.57 | 0.00 | 0.26 | 0.76 | 0.59 | 0.78 | 0.37 | 0.12 | 0.66 | 0.20 | 0.55 | 0.22 | 0.16 | 0.53 | 0.48 | 0.68 | 0.85 | 0.83 | 0.10 | 0.78 |
| Q       | 0.31 | 0.26 | 0.00 | 0.60 | 0.46 | 0.68 | 0.17 | 0.16 | 0.45 | 0.06 | 0.33 | 0.13 | 0.22 | 0.28 | 0.23 | 0.45 | 0.61 | 0.59 | 0.17 | 0.52 |
| F       | 0.60 | 0.76 | 0.60 | 0.00 | 0.17 | 0.20 | 0.71 | 0.65 | 0.85 | 0.64 | 0.30 | 0.73 | 0.81 | 0.63 | 0.61 | 0.25 | 0.32 | 0.36 | 0.71 | 0.47 |
| Y       | 0.54 | 0.59 | 0.46 | 0.17 | 0.00 | 0.23 | 0.59 | 0.49 | 0.78 | 0.49 | 0.23 | 0.59 | 0.65 | 0.55 | 0.52 | 0.26 | 0.40 | 0.43 | 0.55 | 0.50 |
| W       | 0.76 | 0.78 | 0.68 | 0.20 | 0.23 | 0.00 | 0.82 | 0.69 | 1.00 | 0.71 | 0.44 | 0.81 | 0.86 | 0.78 | 0.75 | 0.43 | 0.51 | 0.56 | 0.76 | 0.66 |
| S       | 0.24 | 0.37 | 0.17 | 0.71 | 0.59 | 0.82 | 0.00 | 0.29 | 0.29 | 0.19 | 0.42 | 0.15 | 0.25 | 0.19 | 0.16 | 0.52 | 0.65 | 0.62 | 0.27 | 0.51 |
| H       | 0.47 | 0.12 | 0.16 | 0.65 | 0.49 | 0.69 | 0.29 | 0.00 | 0.59 | 0.10 | 0.43 | 0.18 | 0.18 | 0.44 | 0.39 | 0.56 | 0.73 | 0.72 | 0.07 | 0.67 |
| G       | 0.24 | 0.66 | 0.45 | 0.85 | 0.78 | 1.00 | 0.29 | 0.59 | 0.00 | 0.48 | 0.56 | 0.43 | 0.52 | 0.22 | 0.26 | 0.61 | 0.67 | 0.62 | 0.56 | 0.47 |
| K       | 0.37 | 0.20 | 0.06 | 0.64 | 0.49 | 0.71 | 0.19 | 0.10 | 0.48 | 0.00 | 0.39 | 0.10 | 0.16 | 0.34 | 0.29 | 0.51 | 0.68 | 0.65 | 0.10 | 0.59 |
| P       | 0.31 | 0.55 | 0.33 | 0.30 | 0.23 | 0.44 | 0.42 | 0.43 | 0.56 | 0.39 | 0.00 | 0.47 | 0.55 | 0.34 | 0.31 | 0.13 | 0.30 | 0.29 | 0.48 | 0.30 |
| E       | 0.38 | 0.22 | 0.13 | 0.73 | 0.59 | 0.81 | 0.15 | 0.18 | 0.43 | 0.10 | 0.47 | 0.00 | 0.11 | 0.33 | 0.29 | 0.58 | 0.74 | 0.71 | 0.13 | 0.62 |
| D       | 0.48 | 0.16 | 0.22 | 0.81 | 0.65 | 0.86 | 0.25 | 0.18 | 0.52 | 0.16 | 0.55 | 0.11 | 0.00 | 0.44 | 0.40 | 0.68 | 0.83 | 0.81 | 0.11 | 0.73 |
| T       | 0.05 | 0.53 | 0.28 | 0.63 | 0.55 | 0.78 | 0.19 | 0.44 | 0.22 | 0.34 | 0.34 | 0.33 | 0.44 | 0.00 | 0.05 | 0.40 | 0.50 | 0.45 | 0.43 | 0.33 |
| C       | 0.09 | 0.48 | 0.23 | 0.61 | 0.52 | 0.75 | 0.16 | 0.39 | 0.26 | 0.29 | 0.31 | 0.29 | 0.40 | 0.05 | 0.00 | 0.39 | 0.50 | 0.46 | 0.39 | 0.35 |
| M       | 0.36 | 0.68 | 0.45 | 0.25 | 0.26 | 0.43 | 0.52 | 0.56 | 0.61 | 0.51 | 0.13 | 0.58 | 0.68 | 0.40 | 0.39 | 0.00 | 0.17 | 0.18 | 0.60 | 0.24 |
| L       | 0.45 | 0.85 | 0.61 | 0.32 | 0.40 | 0.51 | 0.65 | 0.73 | 0.67 | 0.68 | 0.30 | 0.74 | 0.83 | 0.50 | 0.50 | 0.17 | 0.00 | 0.06 | 0.77 | 0.21 |
| I       | 0.41 | 0.83 | 0.59 | 0.36 | 0.43 | 0.56 | 0.62 | 0.72 | 0.62 | 0.65 | 0.29 | 0.71 | 0.81 | 0.45 | 0.46 | 0.18 | 0.06 | 0.00 | 0.75 | 0.15 |
| N       | 0.47 | 0.10 | 0.17 | 0.71 | 0.55 | 0.76 | 0.27 | 0.07 | 0.56 | 0.10 | 0.48 | 0.13 | 0.11 | 0.43 | 0.39 | 0.60 | 0.77 | 0.75 | 0.00 | 0.69 |
| V       | 0.28 | 0.78 | 0.52 | 0.47 | 0.50 | 0.66 | 0.51 | 0.67 | 0.47 | 0.59 | 0.30 | 0.62 | 0.73 | 0.33 | 0.35 | 0.24 | 0.21 | 0.15 | 0.69 | 0.00 |

**Supporting table S16. Scaled distance matrix VHSE using 2 PCs.**

| Residue | A    | R    | Q    | F    | Y    | W    | S    | H    | G    | K    | P    | E    | D    | T    | C    | M    | L    | I    | N    | V    |
|---------|------|------|------|------|------|------|------|------|------|------|------|------|------|------|------|------|------|------|------|------|
| A       | 0.00 | 0.76 | 0.42 | 0.55 | 0.69 | 0.87 | 0.22 | 0.26 | 0.14 | 0.56 | 0.24 | 0.51 | 0.55 | 0.20 | 0.14 | 0.26 | 0.43 | 0.37 | 0.40 | 0.16 |
| R       | 0.76 | 0.00 | 0.36 | 0.78 | 0.53 | 0.76 | 0.62 | 0.50 | 0.82 | 0.20 | 0.59 | 0.27 | 0.21 | 0.57 | 0.89 | 0.80 | 0.79 | 0.80 | 0.38 | 0.82 |
| Q       | 0.42 | 0.36 | 0.00 | 0.64 | 0.54 | 0.79 | 0.26 | 0.16 | 0.46 | 0.16 | 0.31 | 0.09 | 0.15 | 0.22 | 0.53 | 0.52 | 0.58 | 0.57 | 0.03 | 0.51 |
| F       | 0.55 | 0.78 | 0.64 | 0.00 | 0.34 | 0.37 | 0.66 | 0.54 | 0.69 | 0.68 | 0.38 | 0.68 | 0.67 | 0.55 | 0.67 | 0.31 | 0.14 | 0.20 | 0.65 | 0.43 |
| Y       | 0.69 | 0.53 | 0.54 | 0.34 | 0.00 | 0.25 | 0.70 | 0.53 | 0.81 | 0.50 | 0.46 | 0.54 | 0.50 | 0.58 | 0.83 | 0.55 | 0.43 | 0.47 | 0.57 | 0.64 |
| W       | 0.87 | 0.76 | 0.79 | 0.37 | 0.25 | 0.00 | 0.92 | 0.76 | 1.00 | 0.75 | 0.65 | 0.79 | 0.75 | 0.80 | 1.00 | 0.66 | 0.50 | 0.56 | 0.81 | 0.77 |
| S       | 0.22 | 0.62 | 0.26 | 0.66 | 0.70 | 0.92 | 0.00 | 0.17 | 0.21 | 0.41 | 0.28 | 0.34 | 0.40 | 0.12 | 0.30 | 0.43 | 0.56 | 0.52 | 0.23 | 0.36 |
| H       | 0.26 | 0.50 | 0.16 | 0.54 | 0.53 | 0.76 | 0.17 | 0.00 | 0.33 | 0.30 | 0.16 | 0.25 | 0.29 | 0.07 | 0.39 | 0.37 | 0.46 | 0.43 | 0.15 | 0.34 |
| G       | 0.14 | 0.82 | 0.46 | 0.69 | 0.81 | 1.00 | 0.21 | 0.33 | 0.00 | 0.61 | 0.36 | 0.54 | 0.60 | 0.26 | 0.10 | 0.40 | 0.56 | 0.51 | 0.43 | 0.29 |
| K       | 0.56 | 0.20 | 0.16 | 0.68 | 0.50 | 0.75 | 0.41 | 0.30 | 0.61 | 0.00 | 0.41 | 0.08 | 0.01 | 0.37 | 0.69 | 0.63 | 0.66 | 0.65 | 0.18 | 0.63 |
| P       | 0.24 | 0.59 | 0.31 | 0.38 | 0.46 | 0.65 | 0.28 | 0.16 | 0.36 | 0.41 | 0.00 | 0.38 | 0.40 | 0.16 | 0.38 | 0.22 | 0.29 | 0.26 | 0.31 | 0.23 |
| E       | 0.51 | 0.27 | 0.09 | 0.68 | 0.54 | 0.79 | 0.34 | 0.25 | 0.54 | 0.08 | 0.38 | 0.00 | 0.07 | 0.31 | 0.62 | 0.60 | 0.64 | 0.63 | 0.11 | 0.59 |
| D       | 0.55 | 0.21 | 0.15 | 0.67 | 0.50 | 0.75 | 0.40 | 0.29 | 0.60 | 0.01 | 0.40 | 0.07 | 0.00 | 0.36 | 0.68 | 0.62 | 0.65 | 0.64 | 0.17 | 0.63 |
| T       | 0.20 | 0.57 | 0.22 | 0.55 | 0.58 | 0.80 | 0.12 | 0.07 | 0.26 | 0.37 | 0.16 | 0.31 | 0.36 | 0.00 | 0.32 | 0.34 | 0.45 | 0.42 | 0.21 | 0.30 |
| C       | 0.14 | 0.89 | 0.53 | 0.67 | 0.83 | 1.00 | 0.30 | 0.39 | 0.10 | 0.69 | 0.38 | 0.62 | 0.68 | 0.32 | 0.00 | 0.36 | 0.53 | 0.47 | 0.51 | 0.24 |
| M       | 0.26 | 0.80 | 0.52 | 0.31 | 0.55 | 0.66 | 0.43 | 0.37 | 0.40 | 0.63 | 0.22 | 0.60 | 0.62 | 0.34 | 0.36 | 0.00 | 0.17 | 0.12 | 0.52 | 0.12 |
| L       | 0.43 | 0.79 | 0.58 | 0.14 | 0.43 | 0.50 | 0.56 | 0.46 | 0.56 | 0.66 | 0.29 | 0.64 | 0.65 | 0.45 | 0.53 | 0.17 | 0.00 | 0.06 | 0.59 | 0.29 |
| I       | 0.37 | 0.80 | 0.57 | 0.20 | 0.47 | 0.56 | 0.52 | 0.43 | 0.51 | 0.65 | 0.26 | 0.63 | 0.64 | 0.42 | 0.47 | 0.12 | 0.06 | 0.00 | 0.57 | 0.23 |
| N       | 0.40 | 0.38 | 0.03 | 0.65 | 0.57 | 0.81 | 0.23 | 0.15 | 0.43 | 0.18 | 0.31 | 0.11 | 0.17 | 0.21 | 0.51 | 0.52 | 0.59 | 0.57 | 0.00 | 0.50 |
| V       | 0.16 | 0.82 | 0.51 | 0.43 | 0.64 | 0.77 | 0.36 | 0.34 | 0.29 | 0.63 | 0.23 | 0.59 | 0.63 | 0.30 | 0.24 | 0.12 | 0.29 | 0.23 | 0.50 | 0.00 |

**Supporting table S17. Scaled distance matrix ST-Scales using 2 PCs.**

| Residue | A    | R    | Q    | F    | Y    | W    | S    | H    | G    | K    | P    | E    | D    | T    | C    | M    | L    | I    | N    | V    |
|---------|------|------|------|------|------|------|------|------|------|------|------|------|------|------|------|------|------|------|------|------|
| A       | 0.00 | 0.79 | 0.51 | 0.64 | 0.85 | 0.94 | 0.19 | 0.65 | 0.31 | 0.55 | 0.23 | 0.56 | 0.36 | 0.19 | 0.18 | 0.57 | 0.31 | 0.30 | 0.37 | 0.16 |
| R       | 0.79 | 0.00 | 0.28 | 0.26 | 0.15 | 0.42 | 0.61 | 0.15 | 0.72 | 0.24 | 0.56 | 0.25 | 0.43 | 0.72 | 0.62 | 0.25 | 0.50 | 0.70 | 0.42 | 0.72 |
| Q       | 0.51 | 0.28 | 0.00 | 0.24 | 0.37 | 0.55 | 0.33 | 0.16 | 0.46 | 0.04 | 0.28 | 0.06 | 0.15 | 0.46 | 0.34 | 0.10 | 0.24 | 0.46 | 0.14 | 0.46 |
| F       | 0.64 | 0.26 | 0.24 | 0.00 | 0.24 | 0.32 | 0.51 | 0.15 | 0.68 | 0.20 | 0.41 | 0.26 | 0.33 | 0.52 | 0.49 | 0.31 | 0.33 | 0.48 | 0.32 | 0.53 |
| Y       | 0.85 | 0.15 | 0.37 | 0.24 | 0.00 | 0.28 | 0.69 | 0.21 | 0.83 | 0.32 | 0.62 | 0.35 | 0.51 | 0.75 | 0.69 | 0.37 | 0.55 | 0.71 | 0.50 | 0.76 |
| W       | 0.94 | 0.42 | 0.55 | 0.32 | 0.28 | 0.00 | 0.82 | 0.42 | 1.00 | 0.51 | 0.72 | 0.56 | 0.65 | 0.79 | 0.81 | 0.60 | 0.64 | 0.72 | 0.65 | 0.81 |
| S       | 0.19 | 0.61 | 0.33 | 0.51 | 0.69 | 0.82 | 0.00 | 0.48 | 0.22 | 0.37 | 0.11 | 0.37 | 0.19 | 0.25 | 0.04 | 0.38 | 0.19 | 0.33 | 0.19 | 0.23 |
| H       | 0.65 | 0.15 | 0.16 | 0.15 | 0.21 | 0.42 | 0.48 | 0.00 | 0.62 | 0.11 | 0.42 | 0.15 | 0.30 | 0.57 | 0.48 | 0.18 | 0.35 | 0.55 | 0.29 | 0.57 |
| G       | 0.31 | 0.72 | 0.46 | 0.68 | 0.83 | 1.00 | 0.22 | 0.62 | 0.00 | 0.51 | 0.33 | 0.48 | 0.35 | 0.45 | 0.25 | 0.47 | 0.40 | 0.54 | 0.35 | 0.42 |
| K       | 0.55 | 0.24 | 0.04 | 0.20 | 0.32 | 0.51 | 0.37 | 0.11 | 0.51 | 0.00 | 0.32 | 0.07 | 0.19 | 0.48 | 0.37 | 0.12 | 0.26 | 0.48 | 0.18 | 0.48 |
| P       | 0.23 | 0.56 | 0.28 | 0.41 | 0.62 | 0.72 | 0.11 | 0.42 | 0.33 | 0.32 | 0.00 | 0.33 | 0.14 | 0.19 | 0.08 | 0.36 | 0.08 | 0.24 | 0.14 | 0.18 |
| E       | 0.56 | 0.25 | 0.06 | 0.26 | 0.35 | 0.56 | 0.37 | 0.15 | 0.48 | 0.07 | 0.33 | 0.00 | 0.19 | 0.51 | 0.38 | 0.05 | 0.29 | 0.52 | 0.19 | 0.51 |
| D       | 0.36 | 0.43 | 0.15 | 0.33 | 0.51 | 0.65 | 0.19 | 0.30 | 0.35 | 0.19 | 0.14 | 0.19 | 0.00 | 0.33 | 0.19 | 0.22 | 0.12 | 0.36 | 0.01 | 0.32 |
| T       | 0.19 | 0.72 | 0.46 | 0.52 | 0.75 | 0.79 | 0.25 | 0.57 | 0.45 | 0.48 | 0.19 | 0.51 | 0.33 | 0.00 | 0.21 | 0.55 | 0.22 | 0.11 | 0.33 | 0.03 |
| C       | 0.18 | 0.62 | 0.34 | 0.49 | 0.69 | 0.81 | 0.04 | 0.48 | 0.25 | 0.37 | 0.08 | 0.38 | 0.19 | 0.21 | 0.00 | 0.40 | 0.17 | 0.29 | 0.19 | 0.19 |
| M       | 0.57 | 0.25 | 0.10 | 0.31 | 0.37 | 0.60 | 0.38 | 0.18 | 0.47 | 0.12 | 0.36 | 0.05 | 0.22 | 0.55 | 0.40 | 0.00 | 0.33 | 0.56 | 0.22 | 0.54 |
| L       | 0.31 | 0.50 | 0.24 | 0.33 | 0.55 | 0.64 | 0.19 | 0.35 | 0.40 | 0.26 | 0.08 | 0.29 | 0.12 | 0.22 | 0.17 | 0.33 | 0.00 | 0.23 | 0.12 | 0.22 |
| I       | 0.30 | 0.70 | 0.46 | 0.48 | 0.71 | 0.72 | 0.33 | 0.55 | 0.54 | 0.48 | 0.24 | 0.52 | 0.36 | 0.11 | 0.29 | 0.56 | 0.23 | 0.00 | 0.36 | 0.14 |
| N       | 0.37 | 0.42 | 0.14 | 0.32 | 0.50 | 0.65 | 0.19 | 0.29 | 0.35 | 0.18 | 0.14 | 0.19 | 0.01 | 0.33 | 0.19 | 0.22 | 0.12 | 0.36 | 0.00 | 0.32 |
| V       | 0.16 | 0.72 | 0.46 | 0.53 | 0.76 | 0.81 | 0.23 | 0.57 | 0.42 | 0.48 | 0.18 | 0.51 | 0.32 | 0.03 | 0.19 | 0.54 | 0.22 | 0.14 | 0.32 | 0.00 |

**Supporting table S18. Scaled distance matrix T-Scales using 2 PCs.**

| Residue | A    | R    | Q    | F    | Y    | W    | S    | H    | G    | K    | P    | E    | D    | T    | C    | M    | L    | I    | N    | V    |
|---------|------|------|------|------|------|------|------|------|------|------|------|------|------|------|------|------|------|------|------|------|
| A       | 0.00 | 0.66 | 0.42 | 0.59 | 0.69 | 0.91 | 0.12 | 0.49 | 0.09 | 0.47 | 0.27 | 0.43 | 0.31 | 0.20 | 0.12 | 0.35 | 0.31 | 0.31 | 0.31 | 0.20 |
| R       | 0.66 | 0.00 | 0.24 | 0.29 | 0.29 | 0.52 | 0.54 | 0.33 | 0.73 | 0.20 | 0.56 | 0.24 | 0.35 | 0.47 | 0.55 | 0.32 | 0.36 | 0.37 | 0.36 | 0.47 |
| Q       | 0.42 | 0.24 | 0.00 | 0.27 | 0.34 | 0.60 | 0.31 | 0.22 | 0.50 | 0.05 | 0.35 | 0.01 | 0.12 | 0.23 | 0.31 | 0.08 | 0.12 | 0.14 | 0.12 | 0.24 |
| F       | 0.59 | 0.29 | 0.27 | 0.00 | 0.10 | 0.34 | 0.48 | 0.09 | 0.68 | 0.27 | 0.38 | 0.27 | 0.33 | 0.39 | 0.48 | 0.30 | 0.31 | 0.29 | 0.33 | 0.39 |
| Y       | 0.69 | 0.29 | 0.34 | 0.10 | 0.00 | 0.26 | 0.58 | 0.20 | 0.77 | 0.33 | 0.48 | 0.34 | 0.42 | 0.49 | 0.58 | 0.39 | 0.40 | 0.39 | 0.41 | 0.49 |
| W       | 0.91 | 0.52 | 0.60 | 0.34 | 0.26 | 0.00 | 0.81 | 0.42 | 1.00 | 0.59 | 0.66 | 0.60 | 0.67 | 0.72 | 0.80 | 0.64 | 0.64 | 0.63 | 0.66 | 0.71 |
| S       | 0.12 | 0.54 | 0.31 | 0.48 | 0.58 | 0.81 | 0.00 | 0.39 | 0.20 | 0.35 | 0.23 | 0.31 | 0.19 | 0.09 | 0.01 | 0.23 | 0.19 | 0.20 | 0.19 | 0.10 |
| H       | 0.49 | 0.33 | 0.22 | 0.09 | 0.20 | 0.42 | 0.39 | 0.00 | 0.59 | 0.24 | 0.28 | 0.23 | 0.25 | 0.31 | 0.39 | 0.23 | 0.23 | 0.21 | 0.25 | 0.30 |
| G       | 0.09 | 0.73 | 0.50 | 0.68 | 0.77 | 1.00 | 0.20 | 0.59 | 0.00 | 0.53 | 0.36 | 0.50 | 0.38 | 0.29 | 0.20 | 0.42 | 0.39 | 0.39 | 0.38 | 0.29 |
| K       | 0.47 | 0.20 | 0.05 | 0.27 | 0.33 | 0.59 | 0.35 | 0.24 | 0.53 | 0.00 | 0.39 | 0.04 | 0.16 | 0.27 | 0.35 | 0.12 | 0.17 | 0.19 | 0.16 | 0.28 |
| P       | 0.27 | 0.56 | 0.35 | 0.38 | 0.48 | 0.66 | 0.23 | 0.28 | 0.36 | 0.39 | 0.00 | 0.35 | 0.26 | 0.19 | 0.21 | 0.28 | 0.24 | 0.21 | 0.26 | 0.17 |
| E       | 0.43 | 0.24 | 0.01 | 0.27 | 0.34 | 0.60 | 0.31 | 0.23 | 0.50 | 0.04 | 0.35 | 0.00 | 0.12 | 0.23 | 0.31 | 0.08 | 0.12 | 0.15 | 0.12 | 0.24 |
| D       | 0.31 | 0.35 | 0.12 | 0.33 | 0.42 | 0.67 | 0.19 | 0.25 | 0.38 | 0.16 | 0.26 | 0.12 | 0.00 | 0.12 | 0.19 | 0.04 | 0.03 | 0.07 | 0.01 | 0.13 |
| T       | 0.20 | 0.47 | 0.23 | 0.39 | 0.49 | 0.72 | 0.09 | 0.31 | 0.29 | 0.27 | 0.19 | 0.23 | 0.12 | 0.00 | 0.09 | 0.15 | 0.11 | 0.11 | 0.11 | 0.02 |
| C       | 0.12 | 0.55 | 0.31 | 0.48 | 0.58 | 0.80 | 0.01 | 0.39 | 0.20 | 0.35 | 0.21 | 0.31 | 0.19 | 0.09 | 0.00 | 0.23 | 0.19 | 0.19 | 0.19 | 0.09 |
| M       | 0.35 | 0.32 | 0.08 | 0.30 | 0.39 | 0.64 | 0.23 | 0.23 | 0.42 | 0.12 | 0.28 | 0.08 | 0.04 | 0.15 | 0.23 | 0.00 | 0.05 | 0.08 | 0.04 | 0.16 |
| L       | 0.31 | 0.36 | 0.12 | 0.31 | 0.40 | 0.64 | 0.19 | 0.23 | 0.39 | 0.17 | 0.24 | 0.12 | 0.03 | 0.11 | 0.19 | 0.05 | 0.00 | 0.04 | 0.03 | 0.12 |
| I       | 0.31 | 0.37 | 0.14 | 0.29 | 0.39 | 0.63 | 0.20 | 0.21 | 0.39 | 0.19 | 0.21 | 0.15 | 0.07 | 0.11 | 0.19 | 0.08 | 0.04 | 0.00 | 0.06 | 0.11 |
| N       | 0.31 | 0.36 | 0.12 | 0.33 | 0.41 | 0.66 | 0.19 | 0.25 | 0.38 | 0.16 | 0.26 | 0.12 | 0.01 | 0.11 | 0.19 | 0.04 | 0.03 | 0.06 | 0.00 | 0.12 |
| V       | 0.20 | 0.47 | 0.24 | 0.39 | 0.49 | 0.71 | 0.10 | 0.30 | 0.29 | 0.28 | 0.17 | 0.24 | 0.13 | 0.02 | 0.09 | 0.16 | 0.12 | 0.11 | 0.12 | 0.00 |

**Supporting table S19. Scaled distance matrix MSWHIM using 2 PCs.**

| Residue | A    | R    | Q    | F    | Y    | W    | S    | H    | G    | K    | P    | E    | D    | T    | C    | M    | L    | I    | N    | V    |
|---------|------|------|------|------|------|------|------|------|------|------|------|------|------|------|------|------|------|------|------|------|
| A       | 0.00 | 0.24 | 0.60 | 0.75 | 0.81 | 0.87 | 0.19 | 0.75 | 0.29 | 0.12 | 0.28 | 0.52 | 0.67 | 0.31 | 0.04 | 0.37 | 0.24 | 0.30 | 0.40 | 0.30 |
| R       | 0.24 | 0.00 | 0.41 | 0.52 | 0.58 | 0.65 | 0.31 | 0.52 | 0.26 | 0.16 | 0.23 | 0.37 | 0.60 | 0.31 | 0.20 | 0.40 | 0.32 | 0.41 | 0.17 | 0.43 |
| Q       | 0.60 | 0.41 | 0.00 | 0.22 | 0.35 | 0.32 | 0.54 | 0.29 | 0.65 | 0.56 | 0.36 | 0.64 | 0.93 | 0.41 | 0.56 | 0.46 | 0.50 | 0.56 | 0.38 | 0.61 |
| F       | 0.75 | 0.52 | 0.22 | 0.00 | 0.13 | 0.13 | 0.73 | 0.09 | 0.72 | 0.68 | 0.55 | 0.62 | 0.90 | 0.62 | 0.71 | 0.68 | 0.69 | 0.77 | 0.41 | 0.81 |
| Y       | 0.81 | 0.58 | 0.35 | 0.13 | 0.00 | 0.15 | 0.82 | 0.06 | 0.73 | 0.73 | 0.65 | 0.59 | 0.86 | 0.72 | 0.77 | 0.79 | 0.79 | 0.87 | 0.44 | 0.91 |
| W       | 0.87 | 0.65 | 0.32 | 0.13 | 0.15 | 0.00 | 0.85 | 0.16 | 0.84 | 0.81 | 0.67 | 0.72 | 1.00 | 0.73 | 0.83 | 0.78 | 0.81 | 0.88 | 0.53 | 0.93 |
| S       | 0.19 | 0.31 | 0.54 | 0.73 | 0.82 | 0.85 | 0.00 | 0.76 | 0.47 | 0.28 | 0.18 | 0.66 | 0.85 | 0.15 | 0.17 | 0.19 | 0.06 | 0.11 | 0.47 | 0.12 |
| H       | 0.75 | 0.52 | 0.29 | 0.09 | 0.06 | 0.16 | 0.76 | 0.00 | 0.69 | 0.68 | 0.59 | 0.56 | 0.84 | 0.66 | 0.72 | 0.73 | 0.73 | 0.81 | 0.39 | 0.85 |
| G       | 0.29 | 0.26 | 0.65 | 0.72 | 0.73 | 0.84 | 0.47 | 0.69 | 0.00 | 0.19 | 0.47 | 0.26 | 0.38 | 0.54 | 0.30 | 0.62 | 0.50 | 0.58 | 0.30 | 0.59 |
| K       | 0.12 | 0.16 | 0.56 | 0.68 | 0.73 | 0.81 | 0.28 | 0.68 | 0.19 | 0.00 | 0.30 | 0.41 | 0.57 | 0.36 | 0.11 | 0.43 | 0.31 | 0.39 | 0.30 | 0.40 |
| P       | 0.28 | 0.23 | 0.36 | 0.55 | 0.65 | 0.67 | 0.18 | 0.59 | 0.47 | 0.30 | 0.00 | 0.60 | 0.83 | 0.09 | 0.24 | 0.18 | 0.14 | 0.23 | 0.36 | 0.26 |
| E       | 0.52 | 0.37 | 0.64 | 0.62 | 0.59 | 0.72 | 0.66 | 0.56 | 0.26 | 0.41 | 0.60 | 0.00 | 0.29 | 0.68 | 0.51 | 0.77 | 0.68 | 0.77 | 0.28 | 0.79 |
| D       | 0.67 | 0.60 | 0.93 | 0.90 | 0.86 | 1.00 | 0.85 | 0.84 | 0.38 | 0.57 | 0.83 | 0.29 | 0.00 | 0.91 | 0.68 | 0.99 | 0.88 | 0.97 | 0.55 | 0.97 |
| T       | 0.31 | 0.31 | 0.41 | 0.62 | 0.72 | 0.73 | 0.15 | 0.66 | 0.54 | 0.36 | 0.09 | 0.68 | 0.91 | 0.00 | 0.27 | 0.09 | 0.09 | 0.15 | 0.45 | 0.20 |
| C       | 0.04 | 0.20 | 0.56 | 0.71 | 0.77 | 0.83 | 0.17 | 0.72 | 0.30 | 0.11 | 0.24 | 0.51 | 0.68 | 0.27 | 0.00 | 0.34 | 0.22 | 0.29 | 0.37 | 0.29 |
| M       | 0.37 | 0.40 | 0.46 | 0.68 | 0.79 | 0.78 | 0.19 | 0.73 | 0.62 | 0.43 | 0.18 | 0.77 | 0.99 | 0.09 | 0.34 | 0.00 | 0.13 | 0.12 | 0.53 | 0.17 |
| L       | 0.24 | 0.32 | 0.50 | 0.69 | 0.79 | 0.81 | 0.06 | 0.73 | 0.50 | 0.31 | 0.14 | 0.68 | 0.88 | 0.09 | 0.22 | 0.13 | 0.00 | 0.09 | 0.47 | 0.12 |
| I       | 0.30 | 0.41 | 0.56 | 0.77 | 0.87 | 0.88 | 0.11 | 0.81 | 0.58 | 0.39 | 0.23 | 0.77 | 0.97 | 0.15 | 0.29 | 0.12 | 0.09 | 0.00 | 0.56 | 0.05 |
| N       | 0.40 | 0.17 | 0.38 | 0.41 | 0.44 | 0.53 | 0.47 | 0.39 | 0.30 | 0.30 | 0.36 | 0.28 | 0.55 | 0.45 | 0.37 | 0.53 | 0.47 | 0.56 | 0.00 | 0.59 |
| V       | 0.30 | 0.43 | 0.61 | 0.81 | 0.91 | 0.93 | 0.12 | 0.85 | 0.59 | 0.40 | 0.26 | 0.79 | 0.97 | 0.20 | 0.29 | 0.17 | 0.12 | 0.05 | 0.59 | 0.00 |

**Supporting table S20. Scaled distance matrix FASGAI using 2 PCs.**

| Residue | A    | R    | Q    | F    | Y    | W    | S    | H    | G    | K    | P    | E    | D    | T    | C    | M    | L    | I    | N    | V    |
|---------|------|------|------|------|------|------|------|------|------|------|------|------|------|------|------|------|------|------|------|------|
| A       | 0.00 | 0.40 | 0.31 | 0.31 | 0.44 | 0.29 | 0.48 | 0.16 | 0.81 | 0.43 | 0.77 | 0.44 | 0.52 | 0.34 | 0.30 | 0.23 | 0.27 | 0.36 | 0.57 | 0.31 |
| R       | 0.40 | 0.00 | 0.09 | 0.65 | 0.53 | 0.56 | 0.38 | 0.25 | 0.74 | 0.07 | 0.67 | 0.27 | 0.22 | 0.38 | 0.60 | 0.61 | 0.67 | 0.73 | 0.35 | 0.68 |
| Q       | 0.31 | 0.09 | 0.00 | 0.56 | 0.46 | 0.47 | 0.34 | 0.16 | 0.71 | 0.14 | 0.65 | 0.29 | 0.24 | 0.31 | 0.51 | 0.53 | 0.58 | 0.64 | 0.35 | 0.59 |
| F       | 0.31 | 0.65 | 0.56 | 0.00 | 0.39 | 0.14 | 0.55 | 0.40 | 0.77 | 0.70 | 0.76 | 0.74 | 0.70 | 0.39 | 0.10 | 0.29 | 0.22 | 0.10 | 0.68 | 0.07 |
| Y       | 0.44 | 0.53 | 0.46 | 0.39 | 0.00 | 0.25 | 0.22 | 0.38 | 0.39 | 0.59 | 0.37 | 0.74 | 0.44 | 0.14 | 0.29 | 0.60 | 0.57 | 0.49 | 0.35 | 0.46 |
| W       | 0.29 | 0.56 | 0.47 | 0.14 | 0.25 | 0.00 | 0.41 | 0.33 | 0.63 | 0.61 | 0.62 | 0.70 | 0.57 | 0.25 | 0.05 | 0.38 | 0.33 | 0.24 | 0.54 | 0.21 |
| S       | 0.48 | 0.38 | 0.34 | 0.55 | 0.22 | 0.41 | 0.00 | 0.35 | 0.37 | 0.44 | 0.32 | 0.63 | 0.24 | 0.16 | 0.46 | 0.68 | 0.69 | 0.65 | 0.14 | 0.61 |
| H       | 0.16 | 0.25 | 0.16 | 0.40 | 0.38 | 0.33 | 0.35 | 0.00 | 0.71 | 0.30 | 0.66 | 0.38 | 0.36 | 0.25 | 0.35 | 0.38 | 0.43 | 0.47 | 0.42 | 0.42 |
| G       | 0.81 | 0.74 | 0.71 | 0.77 | 0.39 | 0.63 | 0.37 | 0.71 | 0.00 | 0.80 | 0.07 | 1.00 | 0.55 | 0.47 | 0.67 | 0.99 | 0.96 | 0.86 | 0.40 | 0.84 |
| K       | 0.43 | 0.07 | 0.14 | 0.70 | 0.59 | 0.61 | 0.44 | 0.30 | 0.80 | 0.00 | 0.74 | 0.22 | 0.27 | 0.45 | 0.65 | 0.63 | 0.70 | 0.77 | 0.41 | 0.72 |
| P       | 0.77 | 0.67 | 0.65 | 0.76 | 0.37 | 0.62 | 0.32 | 0.66 | 0.07 | 0.74 | 0.00 | 0.94 | 0.48 | 0.43 | 0.66 | 0.96 | 0.94 | 0.85 | 0.33 | 0.82 |
| E       | 0.44 | 0.27 | 0.29 | 0.74 | 0.74 | 0.70 | 0.63 | 0.38 | 1.00 | 0.22 | 0.94 | 0.00 | 0.48 | 0.60 | 0.72 | 0.59 | 0.68 | 0.79 | 0.62 | 0.74 |
| D       | 0.52 | 0.22 | 0.24 | 0.70 | 0.44 | 0.57 | 0.24 | 0.36 | 0.55 | 0.27 | 0.48 | 0.48 | 0.00 | 0.33 | 0.62 | 0.75 | 0.78 | 0.79 | 0.15 | 0.74 |
| T       | 0.34 | 0.38 | 0.31 | 0.39 | 0.14 | 0.25 | 0.16 | 0.25 | 0.47 | 0.45 | 0.43 | 0.60 | 0.33 | 0.00 | 0.30 | 0.53 | 0.53 | 0.49 | 0.29 | 0.45 |
| C       | 0.30 | 0.60 | 0.51 | 0.10 | 0.29 | 0.05 | 0.46 | 0.35 | 0.67 | 0.65 | 0.66 | 0.72 | 0.62 | 0.30 | 0.00 | 0.35 | 0.30 | 0.19 | 0.59 | 0.16 |
| M       | 0.23 | 0.61 | 0.53 | 0.29 | 0.60 | 0.38 | 0.68 | 0.38 | 0.99 | 0.63 | 0.96 | 0.59 | 0.75 | 0.53 | 0.35 | 0.00 | 0.10 | 0.27 | 0.78 | 0.24 |
| L       | 0.27 | 0.67 | 0.58 | 0.22 | 0.57 | 0.33 | 0.69 | 0.43 | 0.96 | 0.70 | 0.94 | 0.68 | 0.78 | 0.53 | 0.30 | 0.10 | 0.00 | 0.18 | 0.80 | 0.16 |
| I       | 0.36 | 0.73 | 0.64 | 0.10 | 0.49 | 0.24 | 0.65 | 0.47 | 0.86 | 0.77 | 0.85 | 0.79 | 0.79 | 0.49 | 0.19 | 0.27 | 0.18 | 0.00 | 0.77 | 0.05 |
| N       | 0.57 | 0.35 | 0.35 | 0.68 | 0.35 | 0.54 | 0.14 | 0.42 | 0.40 | 0.41 | 0.33 | 0.62 | 0.15 | 0.29 | 0.59 | 0.78 | 0.80 | 0.77 | 0.00 | 0.73 |
| V       | 0.31 | 0.68 | 0.59 | 0.07 | 0.46 | 0.21 | 0.61 | 0.42 | 0.84 | 0.72 | 0.82 | 0.74 | 0.74 | 0.45 | 0.16 | 0.24 | 0.16 | 0.05 | 0.73 | 0.00 |



**Supporting table S21. Scaled distance matrix BLOSUM using 2 PCs.**

| Residue | A    | R    | Q    | F    | Y    | W    | S    | H    | G    | K    | P    | E    | D    | T    | C    | M    | L    | I    | N    | V    |
|---------|------|------|------|------|------|------|------|------|------|------|------|------|------|------|------|------|------|------|------|------|
| A       | 0.00 | 0.37 | 0.41 | 0.66 | 0.76 | 0.93 | 0.23 | 0.66 | 0.35 | 0.36 | 0.22 | 0.47 | 0.45 | 0.06 | 0.30 | 0.28 | 0.38 | 0.40 | 0.47 | 0.32 |
| R       | 0.37 | 0.00 | 0.03 | 0.71 | 0.69 | 0.86 | 0.17 | 0.36 | 0.04 | 0.07 | 0.23 | 0.12 | 0.15 | 0.32 | 0.64 | 0.55 | 0.68 | 0.72 | 0.13 | 0.66 |
| Q       | 0.41 | 0.03 | 0.00 | 0.73 | 0.69 | 0.86 | 0.20 | 0.34 | 0.07 | 0.09 | 0.26 | 0.10 | 0.14 | 0.35 | 0.67 | 0.58 | 0.71 | 0.76 | 0.11 | 0.70 |
| F       | 0.66 | 0.71 | 0.73 | 0.00 | 0.23 | 0.33 | 0.74 | 0.62 | 0.67 | 0.76 | 0.78 | 0.83 | 0.86 | 0.65 | 0.56 | 0.45 | 0.48 | 0.55 | 0.83 | 0.59 |
| Y       | 0.76 | 0.69 | 0.69 | 0.23 | 0.00 | 0.18 | 0.76 | 0.48 | 0.65 | 0.75 | 0.81 | 0.78 | 0.83 | 0.73 | 0.74 | 0.60 | 0.67 | 0.75 | 0.79 | 0.77 |
| W       | 0.93 | 0.86 | 0.86 | 0.33 | 0.18 | 0.00 | 0.94 | 0.62 | 0.83 | 0.92 | 0.99 | 0.95 | 1.00 | 0.90 | 0.89 | 0.76 | 0.81 | 0.88 | 0.96 | 0.91 |
| S       | 0.23 | 0.17 | 0.20 | 0.74 | 0.76 | 0.94 | 0.00 | 0.52 | 0.16 | 0.13 | 0.06 | 0.24 | 0.22 | 0.18 | 0.53 | 0.47 | 0.59 | 0.62 | 0.24 | 0.55 |
| H       | 0.66 | 0.36 | 0.34 | 0.62 | 0.48 | 0.62 | 0.52 | 0.00 | 0.36 | 0.42 | 0.58 | 0.39 | 0.45 | 0.61 | 0.83 | 0.70 | 0.83 | 0.89 | 0.40 | 0.86 |
| G       | 0.35 | 0.04 | 0.07 | 0.67 | 0.65 | 0.83 | 0.16 | 0.36 | 0.00 | 0.09 | 0.22 | 0.16 | 0.19 | 0.29 | 0.60 | 0.51 | 0.64 | 0.69 | 0.17 | 0.63 |
| K       | 0.36 | 0.07 | 0.09 | 0.76 | 0.75 | 0.92 | 0.13 | 0.42 | 0.09 | 0.00 | 0.18 | 0.11 | 0.11 | 0.30 | 0.64 | 0.56 | 0.69 | 0.73 | 0.12 | 0.66 |
| P       | 0.22 | 0.23 | 0.26 | 0.78 | 0.81 | 0.99 | 0.06 | 0.58 | 0.22 | 0.18 | 0.00 | 0.28 | 0.25 | 0.18 | 0.52 | 0.48 | 0.59 | 0.62 | 0.28 | 0.54 |
| E       | 0.47 | 0.12 | 0.10 | 0.83 | 0.78 | 0.95 | 0.24 | 0.39 | 0.16 | 0.11 | 0.28 | 0.00 | 0.06 | 0.42 | 0.75 | 0.66 | 0.80 | 0.84 | 0.01 | 0.77 |
| D       | 0.45 | 0.15 | 0.14 | 0.86 | 0.83 | 1.00 | 0.22 | 0.45 | 0.19 | 0.11 | 0.25 | 0.06 | 0.00 | 0.40 | 0.74 | 0.67 | 0.80 | 0.83 | 0.06 | 0.76 |
| T       | 0.06 | 0.32 | 0.35 | 0.65 | 0.73 | 0.90 | 0.18 | 0.61 | 0.29 | 0.30 | 0.18 | 0.42 | 0.40 | 0.00 | 0.34 | 0.30 | 0.41 | 0.44 | 0.42 | 0.36 |
| C       | 0.30 | 0.64 | 0.67 | 0.56 | 0.74 | 0.89 | 0.53 | 0.83 | 0.60 | 0.64 | 0.52 | 0.75 | 0.74 | 0.34 | 0.00 | 0.14 | 0.11 | 0.10 | 0.75 | 0.03 |
| M       | 0.28 | 0.55 | 0.58 | 0.45 | 0.60 | 0.76 | 0.47 | 0.70 | 0.51 | 0.56 | 0.48 | 0.66 | 0.67 | 0.30 | 0.14 | 0.00 | 0.13 | 0.19 | 0.67 | 0.17 |
| L       | 0.38 | 0.68 | 0.71 | 0.48 | 0.67 | 0.81 | 0.59 | 0.83 | 0.64 | 0.69 | 0.59 | 0.80 | 0.80 | 0.41 | 0.11 | 0.13 | 0.00 | 0.07 | 0.80 | 0.12 |
| I       | 0.40 | 0.72 | 0.76 | 0.55 | 0.75 | 0.88 | 0.62 | 0.89 | 0.69 | 0.73 | 0.62 | 0.84 | 0.83 | 0.44 | 0.10 | 0.19 | 0.07 | 0.00 | 0.84 | 0.09 |
| N       | 0.47 | 0.13 | 0.11 | 0.83 | 0.79 | 0.96 | 0.24 | 0.40 | 0.17 | 0.12 | 0.28 | 0.01 | 0.06 | 0.42 | 0.75 | 0.67 | 0.80 | 0.84 | 0.00 | 0.78 |
| V       | 0.32 | 0.66 | 0.70 | 0.59 | 0.77 | 0.91 | 0.55 | 0.86 | 0.63 | 0.66 | 0.54 | 0.77 | 0.76 | 0.36 | 0.03 | 0.17 | 0.12 | 0.09 | 0.78 | 0.00 |

**Supporting Table S22. The binned Z-Scales**

| Amino Acid | Lipophilicity (Z1) |      |      |      | Size (Z2) |      |      |      | Polarity (Z3) |      |      | Electronegativity (Z4) |      |      |      | Electrophilicity (Z5) |      |      |      |
|------------|--------------------|------|------|------|-----------|------|------|------|---------------|------|------|------------------------|------|------|------|-----------------------|------|------|------|
|            | --                 | -    | +    | ++   | --        | -    | +    | ++   | -             | +    | ++   | --                     | -    | +    | ++   | --                    | -    | +    | ++   |
| G          | 1                  | 0    | 0    | 0    | 1         | 0    | 0    | 0    | 0             | 0    | 1    | 0                      | 1    | 0    | 0    | 0                     | 1    | 0    | 0    |
| A          | 0                  | 0    | 1    | 0    | 1         | 0    | 0    | 0    | 0             | 0    | 1    | 0                      | 1    | 0    | 0    | 0                     | 0    | 0    | 1    |
| C          | 0                  | 0    | 1    | 0    | 0         | 1    | 0    | 0    | 0             | 0    | 1    | 0                      | 0    | 1    | 0    | 1                     | 0    | 0    | 0    |
| V          | 0                  | 0    | 0    | 1    | 1         | 0    | 0    | 0    | 0             | 1    | 0    | 0                      | 1    | 0    | 0    | 0                     | 1    | 0    | 0    |
| L          | 0                  | 0    | 0    | 1    | 0         | 1    | 0    | 0    | 0             | 1    | 0    | 0                      | 1    | 0    | 0    | 0                     | 0    | 1    | 0    |
| I          | 0                  | 0    | 0    | 1    | 0         | 1    | 0    | 0    | 1             | 0    | 0    | 0                      | 1    | 0    | 0    | 0                     | 0    | 1    | 0    |
| M          | 0                  | 0    | 0    | 1    | 0         | 1    | 0    | 0    | 0             | 0    | 1    | 0                      | 0    | 0    | 1    | 0                     | 1    | 0    | 0    |
| F          | 0                  | 0    | 0    | 1    | 0         | 0    | 0    | 1    | 0             | 0    | 1    | 0                      | 0    | 1    | 0    | 0                     | 1    | 0    | 0    |
| W          | 0                  | 0    | 0    | 1    | 0         | 0    | 0    | 1    | 0             | 0    | 1    | 0                      | 0    | 0    | 1    | 1                     | 0    | 0    | 0    |
| Y          | 0                  | 0    | 0    | 1    | 0         | 0    | 0    | 1    | 0             | 0    | 1    | 0                      | 1    | 0    | 0    | 1                     | 0    | 0    | 0    |
| H          | 1                  | 0    | 0    | 0    | 0         | 0    | 0    | 1    | 0             | 0    | 1    | 0                      | 0    | 0    | 1    | 0                     | 0    | 1    | 0    |
| T          | 0                  | 0    | 1    | 0    | 1         | 0    | 0    | 0    | 0             | 1    | 0    | 1                      | 0    | 0    | 0    | 0                     | 1    | 0    | 0    |
| P          | 0                  | 1    | 0    | 0    | 0         | 0    | 1    | 0    | 0             | 0    | 1    | 0                      | 0    | 1    | 0    | 0                     | 0    | 0    | 1    |
| S          | 1                  | 0    | 0    | 0    | 0         | 1    | 0    | 0    | 0             | 0    | 1    | 1                      | 0    | 0    | 0    | 0                     | 0    | 1    | 0    |
| D          | 1                  | 0    | 0    | 0    | 0         | 0    | 1    | 0    | 0             | 0    | 1    | 1                      | 0    | 0    | 0    | 0                     | 0    | 1    | 0    |
| N          | 1                  | 0    | 0    | 0    | 0         | 0    | 1    | 0    | 0             | 0    | 1    | 0                      | 1    | 0    | 0    | 0                     | 0    | 0    | 1    |
| E          | 1                  | 0    | 0    | 0    | 0         | 0    | 1    | 0    | 0             | 1    | 0    | 1                      | 0    | 0    | 0    | 0                     | 1    | 0    | 0    |
| Q          | 0                  | 0    | 1    | 0    | 0         | 0    | 1    | 0    | 0             | 1    | 0    | 1                      | 0    | 0    | 0    | 0                     | 0    | 1    | 0    |
| K          | 1                  | 0    | 0    | 0    | 0         | 0    | 1    | 0    | 1             | 0    | 0    | 0                      | 0    | 1    | 0    | 0                     | 0    | 1    | 0    |
| R          | 1                  | 0    | 0    | 0    | 0         | 0    | 0    | 1    | 1             | 0    | 0    | 0                      | 0    | 0    | 1    | 0                     | 1    | 0    | 0    |
| Average    | 0.40               | 0.05 | 0.20 | 0.35 | 0.20      | 0.25 | 0.30 | 0.25 | 0.15          | 0.25 | 0.60 | 0.25                   | 0.35 | 0.20 | 0.20 | 0.15                  | 0.35 | 0.35 | 0.15 |

The score on the scales is given as – (very low), - (low) , + (high) or ++ (very high). For the 3<sup>rd</sup> scale only 3 classes were used. Also note that scale 1 has been reversed to make it more intuitive (++ is now large instead of the other way around).

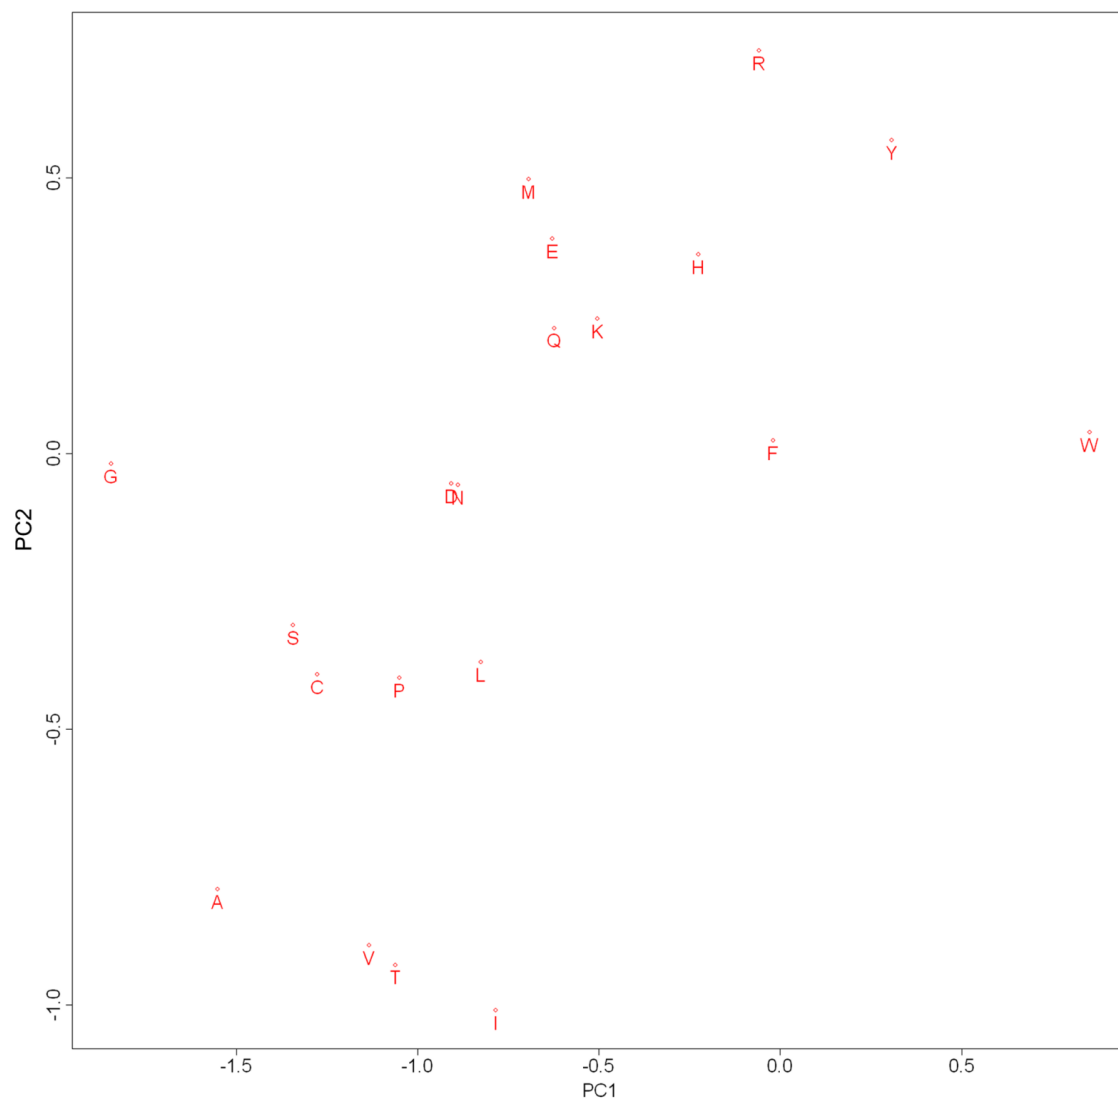

**Supporting figure S1.** Plot of the first two PCs in the ST-scales descriptor set.

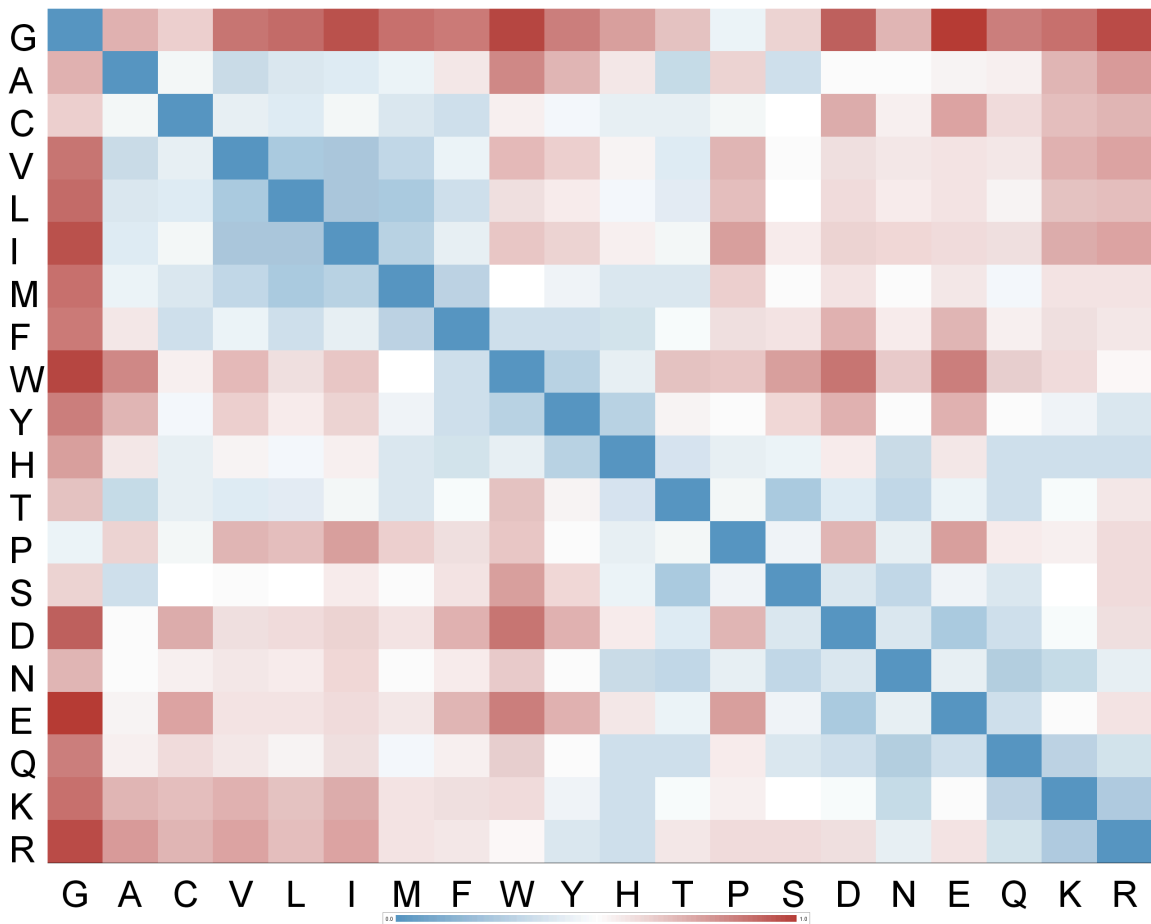

**Supporting Figure S2.** Heat map of the ProtFP\_PCA (3) descriptor set characterizing the inter amino acids differences in.

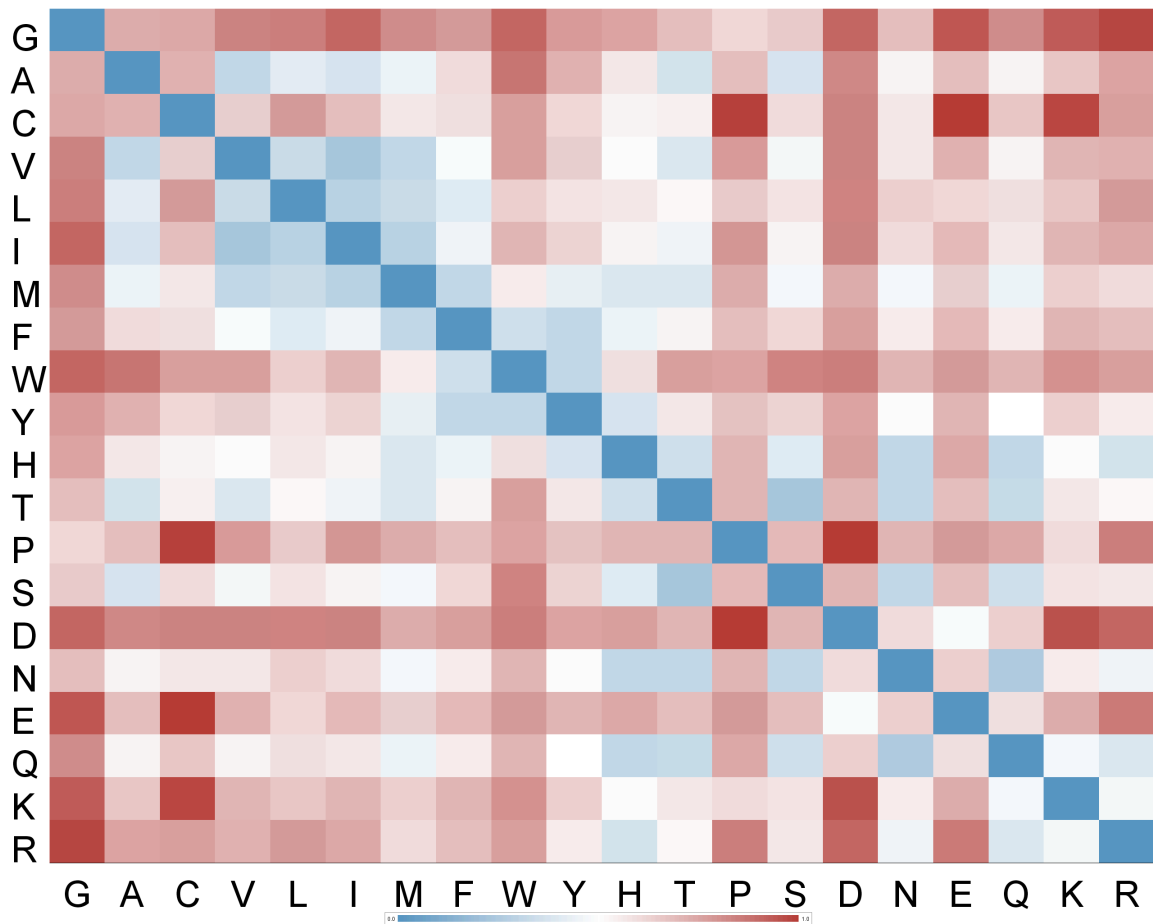

**Supporting Figure S3.** Heat map of the ProtFP\_PCA (5) descriptor set characterizing the inter amino acids differences.

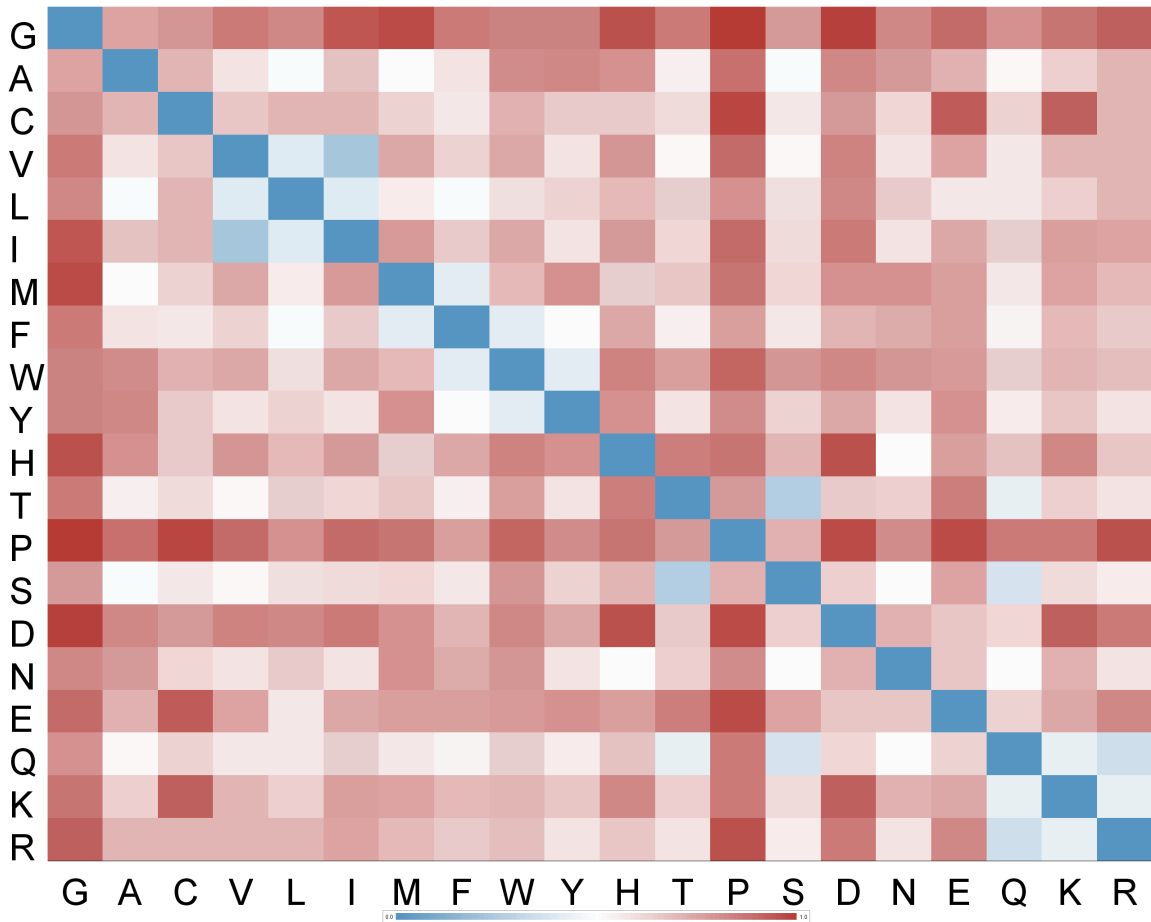

**Supporting Figure S4.** Heat map of the ProtFP\_PCA (8) descriptor set characterizing the inter amino acids differences.

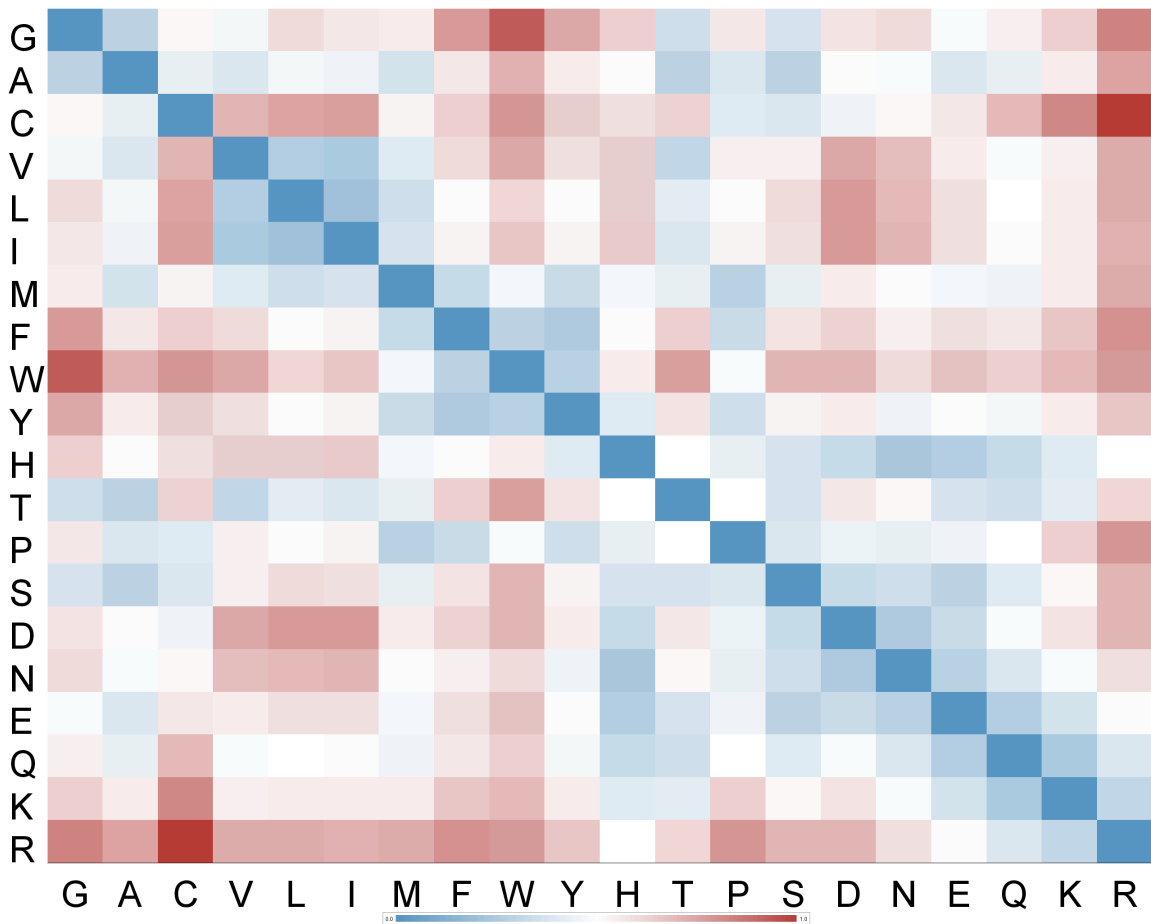

**Supporting Figure S5.** Heat map of the Z-Scales (3) descriptor set characterizing the inter amino acids differences.

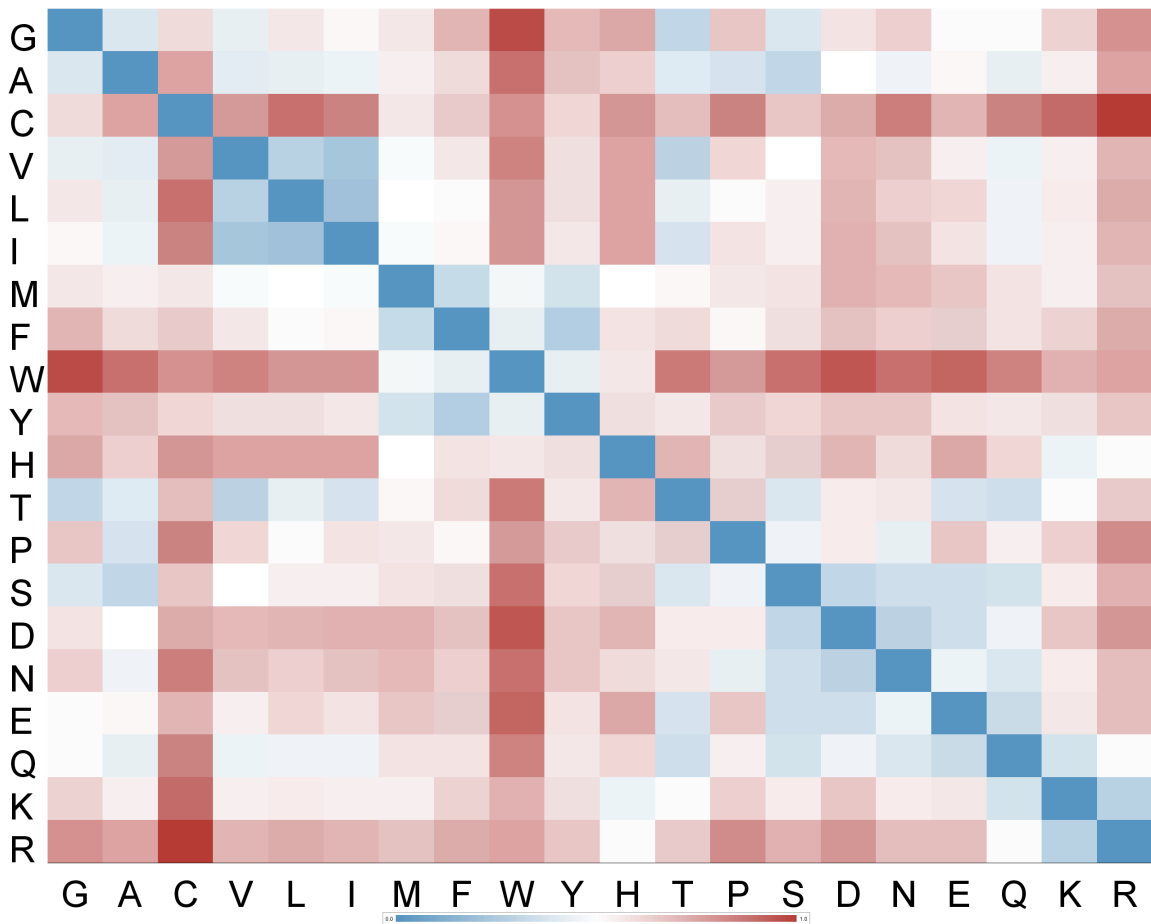

**Supporting Figure S6.** Heat map of the Z-Scales (5) descriptor set characterizing the inter amino acids differences.



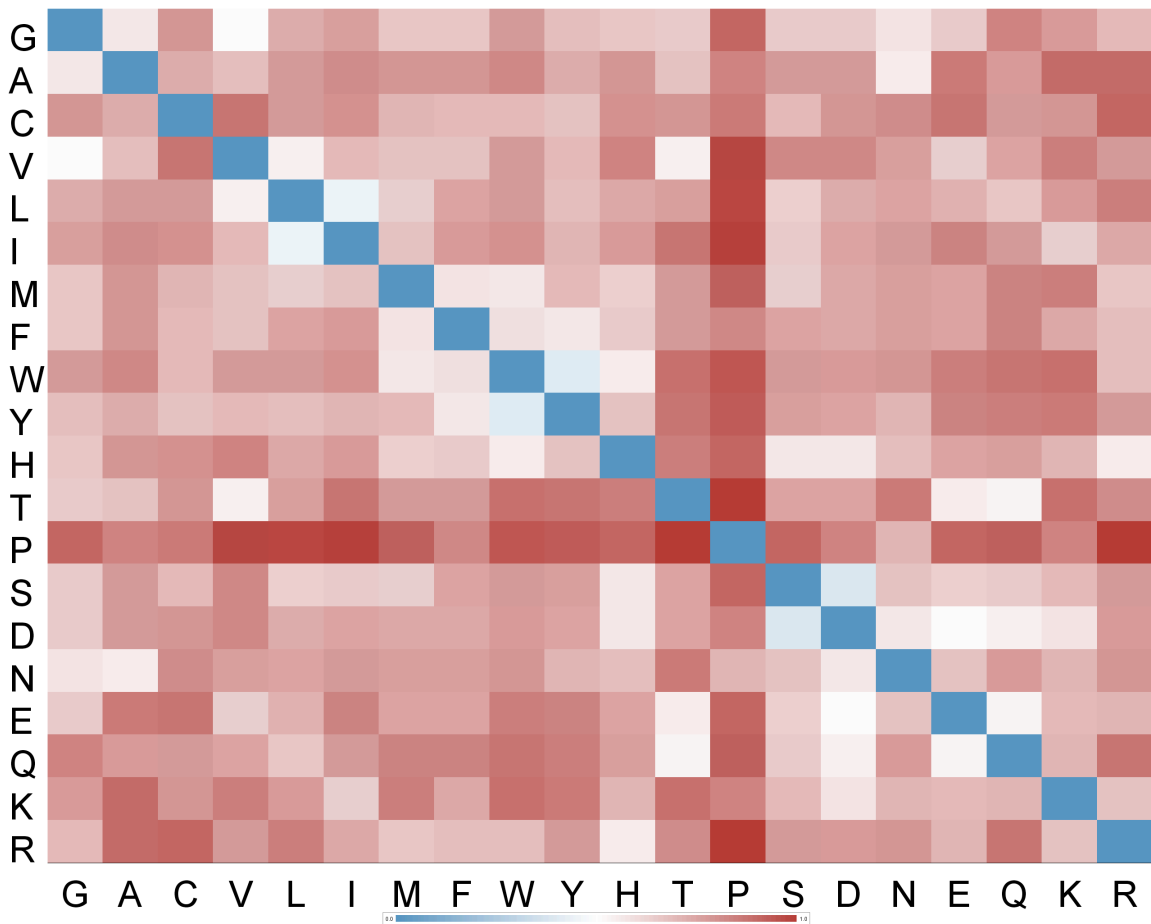

**Supporting Figure S7.** Heat map of the Z-Scales (Binned) descriptor set characterizing the inter amino acids differences.

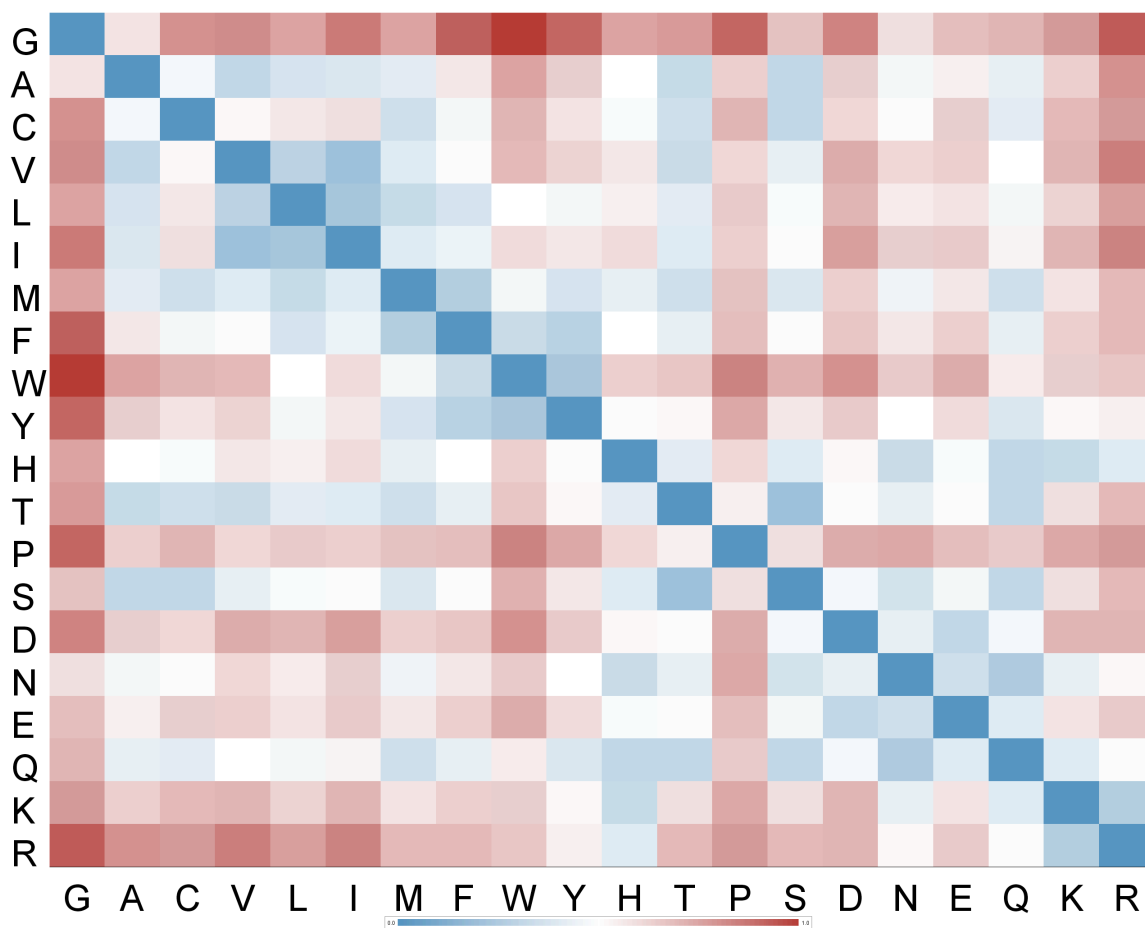

**Supporting figure S8.** Heat map of the VHSE descriptor set characterizing the inter amino acids differences.

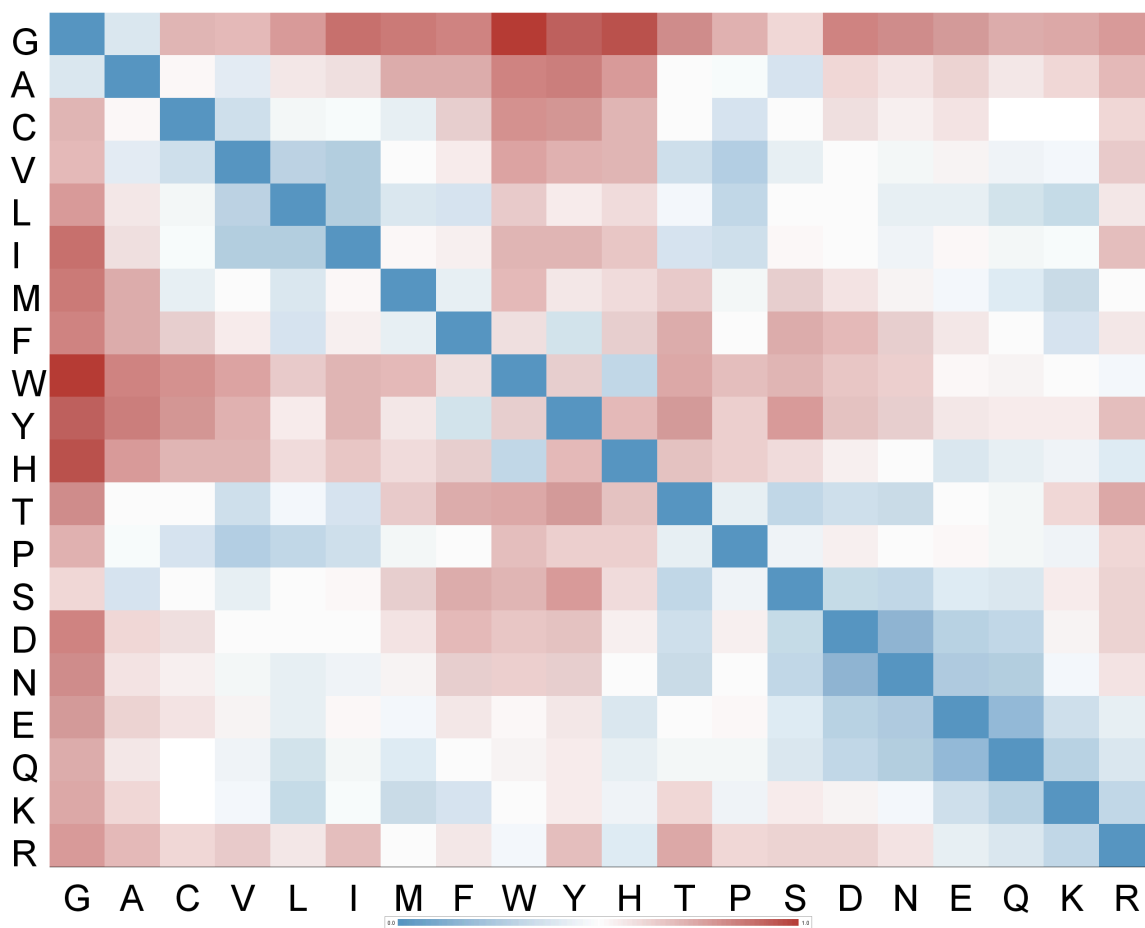

**Supporting figure S9.** Heat map of the ST-Scales descriptor set characterizing the inter amino acids differences.

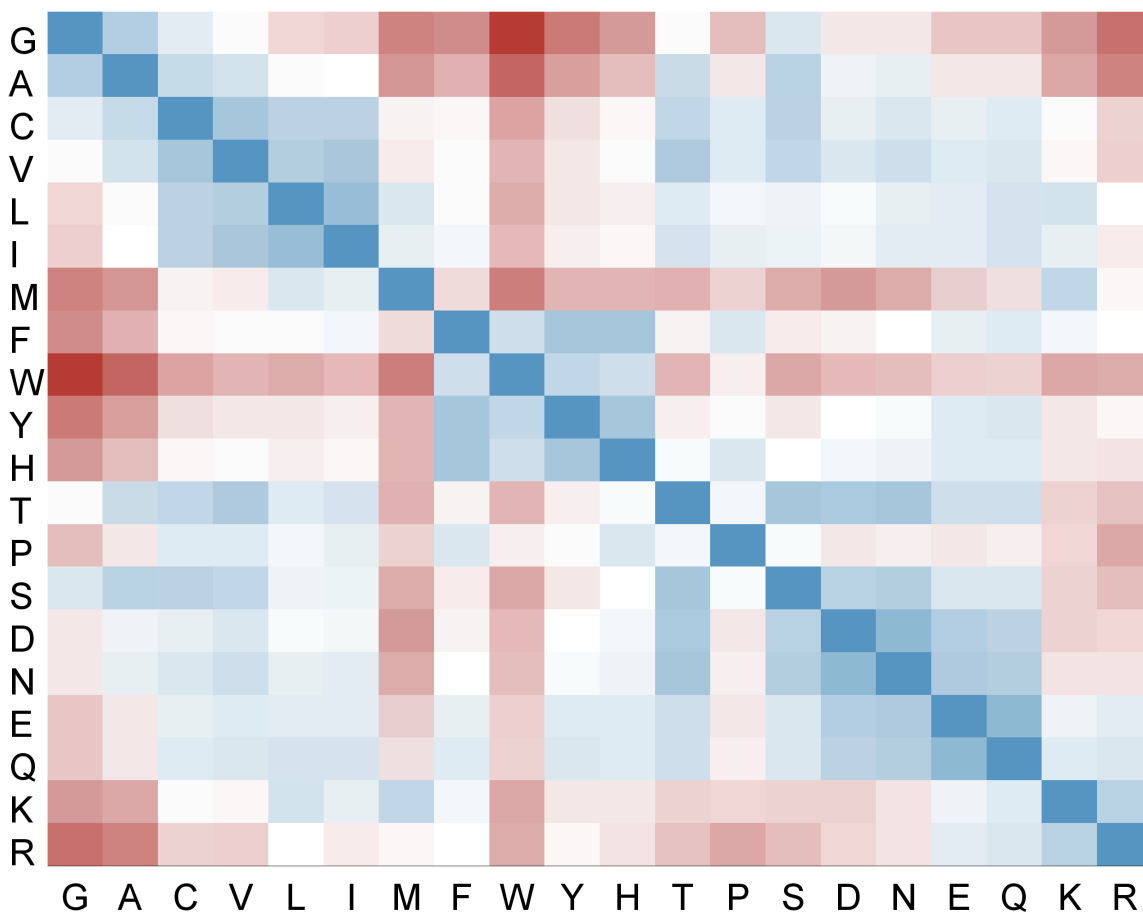

**Supporting figure S10.** Heat map of the T-Scales descriptor set characterizing the inter amino acids differences.

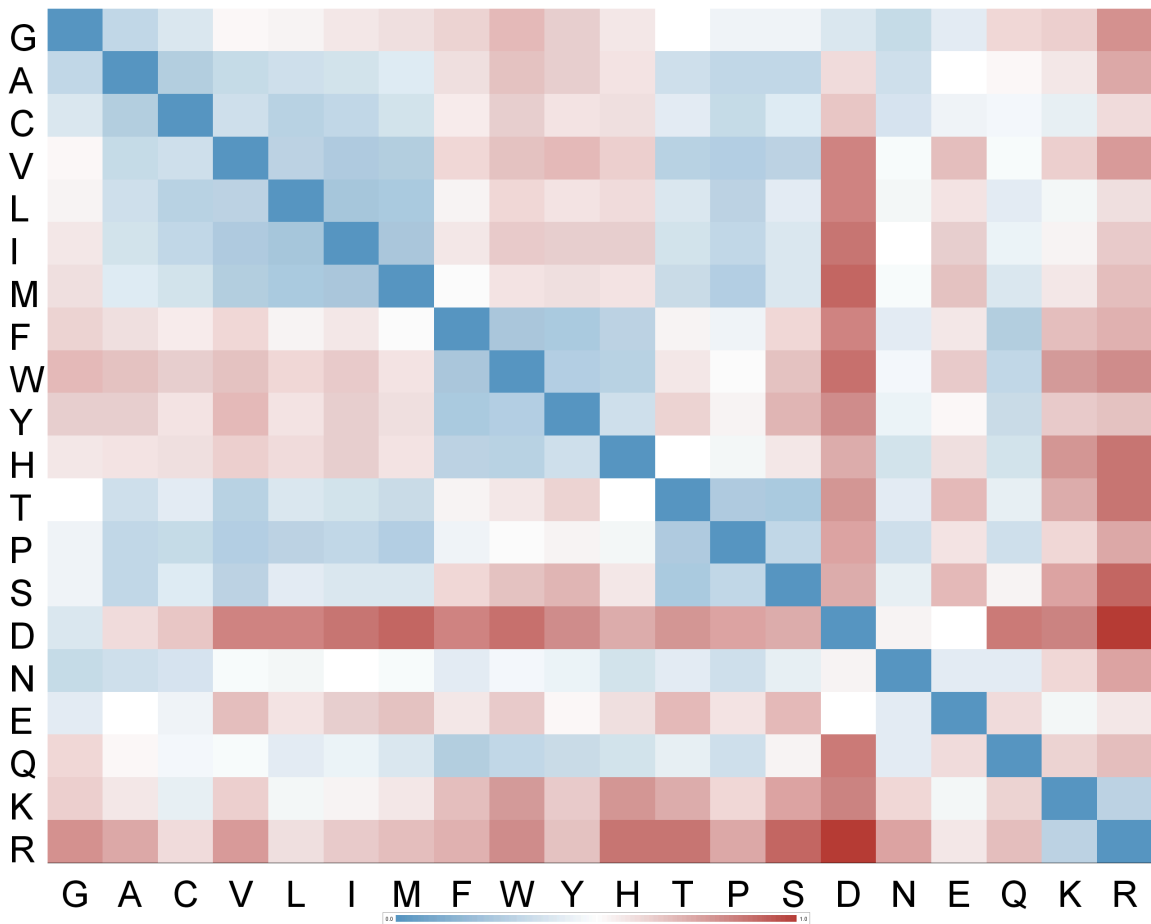

**Supporting figure S11.** Heat map of the MSWHIM descriptor set characterizing the inter amino acids differences.

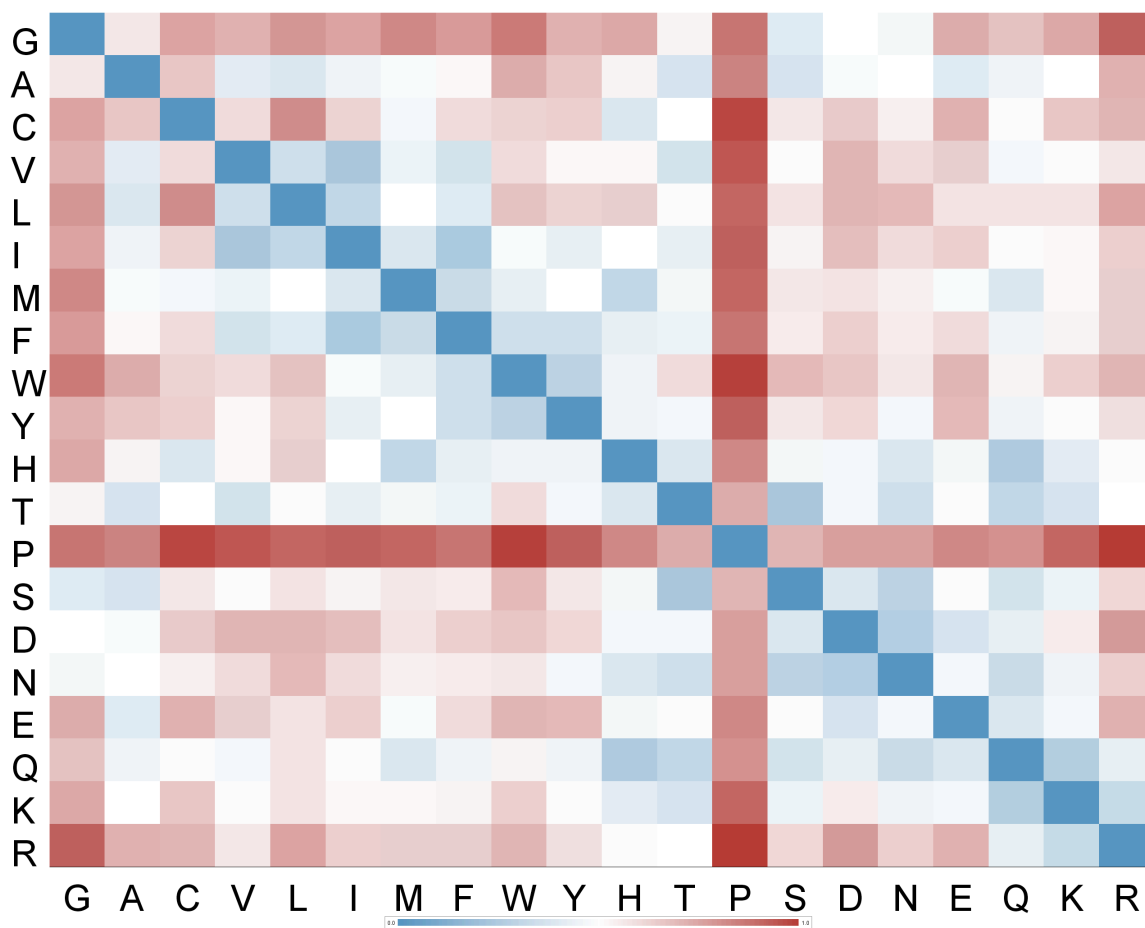

**Supporting figure S12.** Heat map of the FASGAI descriptor set characterizing the inter amino acids differences.

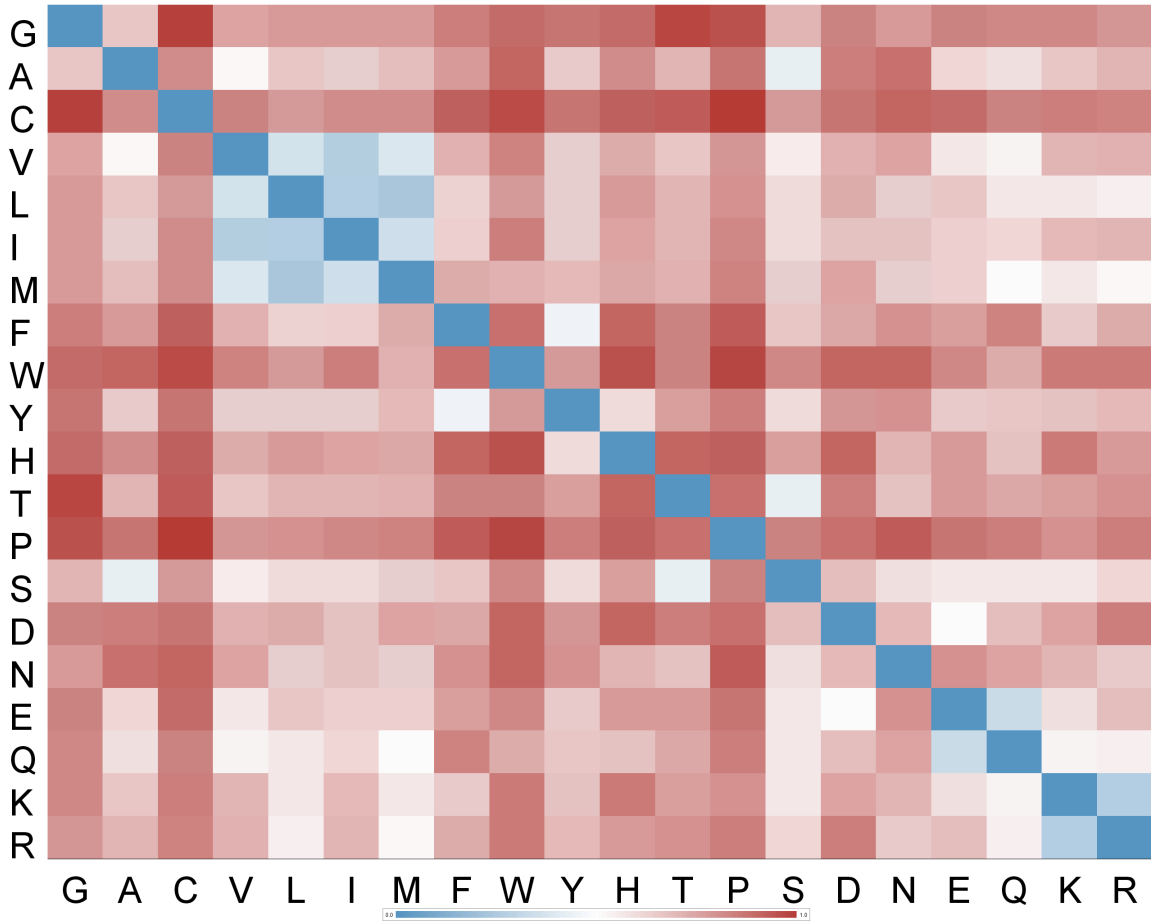

**Supporting figure S13.** Heat map of the BLOSUM descriptor set characterizing the inter amino acids differences.

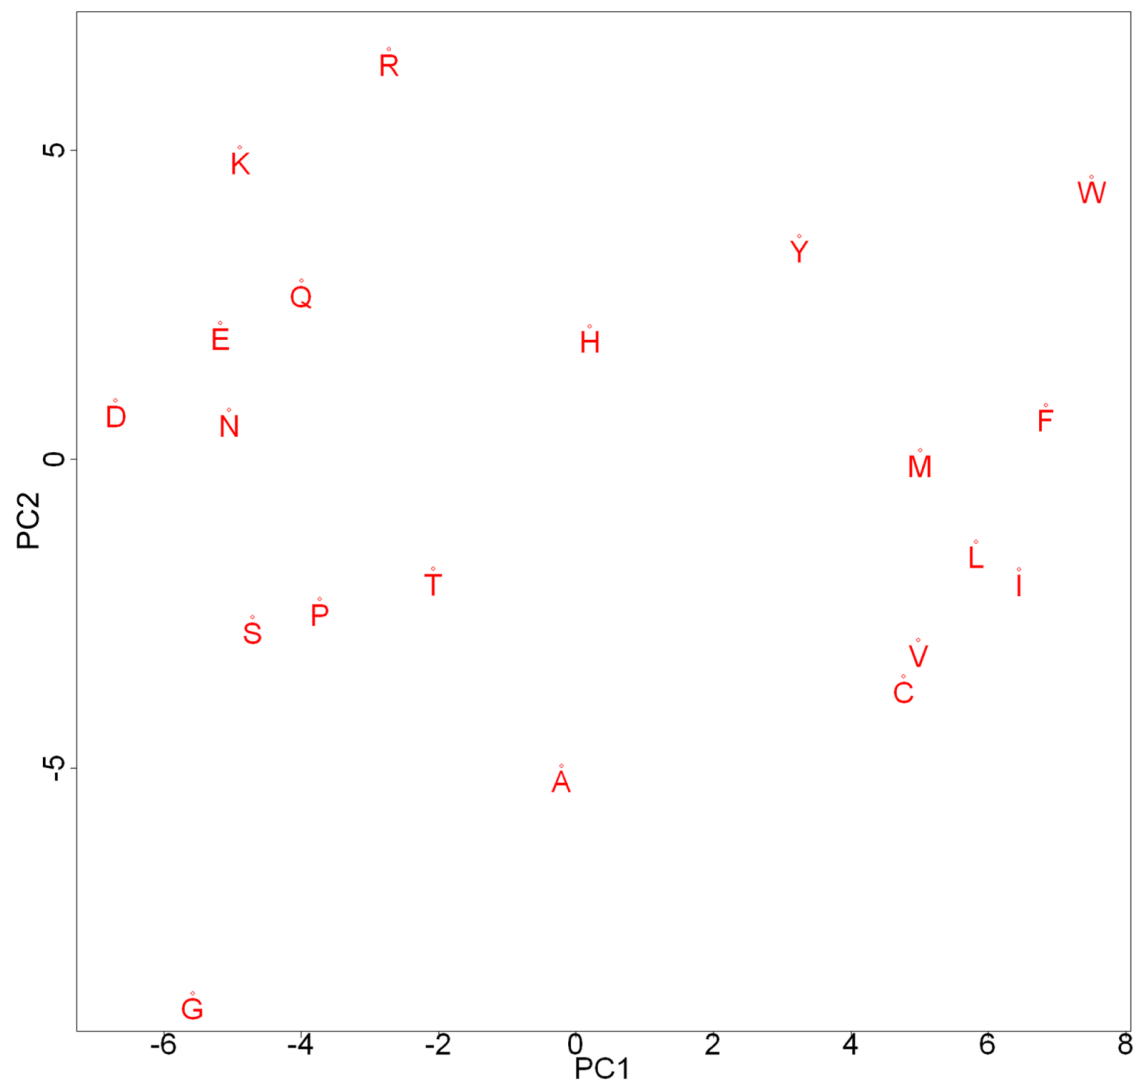

**Supporting figure S14.** Plot of the first two PCs in the ProtFP\_PCA descriptor set.



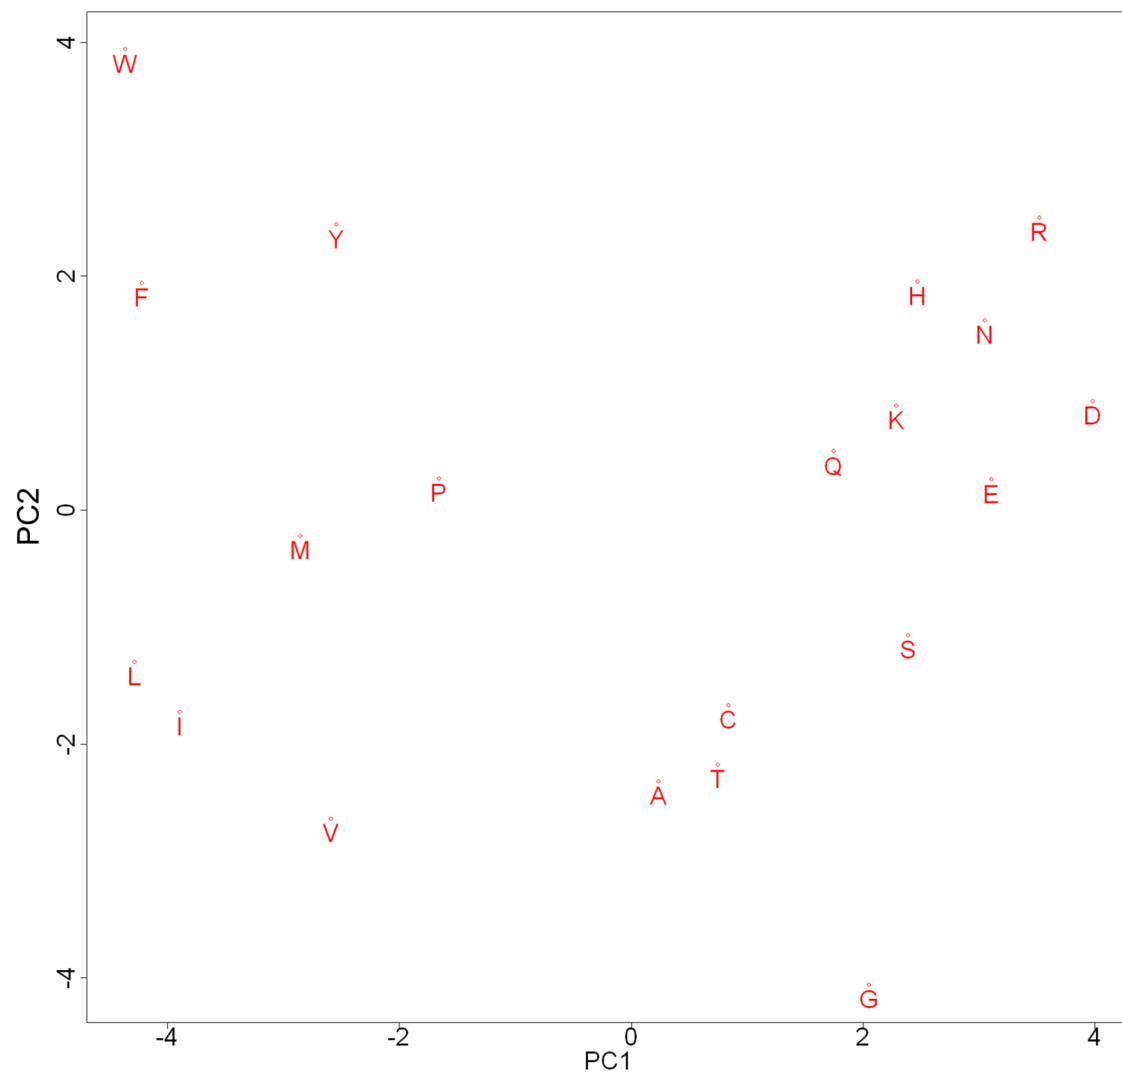

**Supporting figure S15.** Plot of the first two PCs in the Z-scales descriptor set.

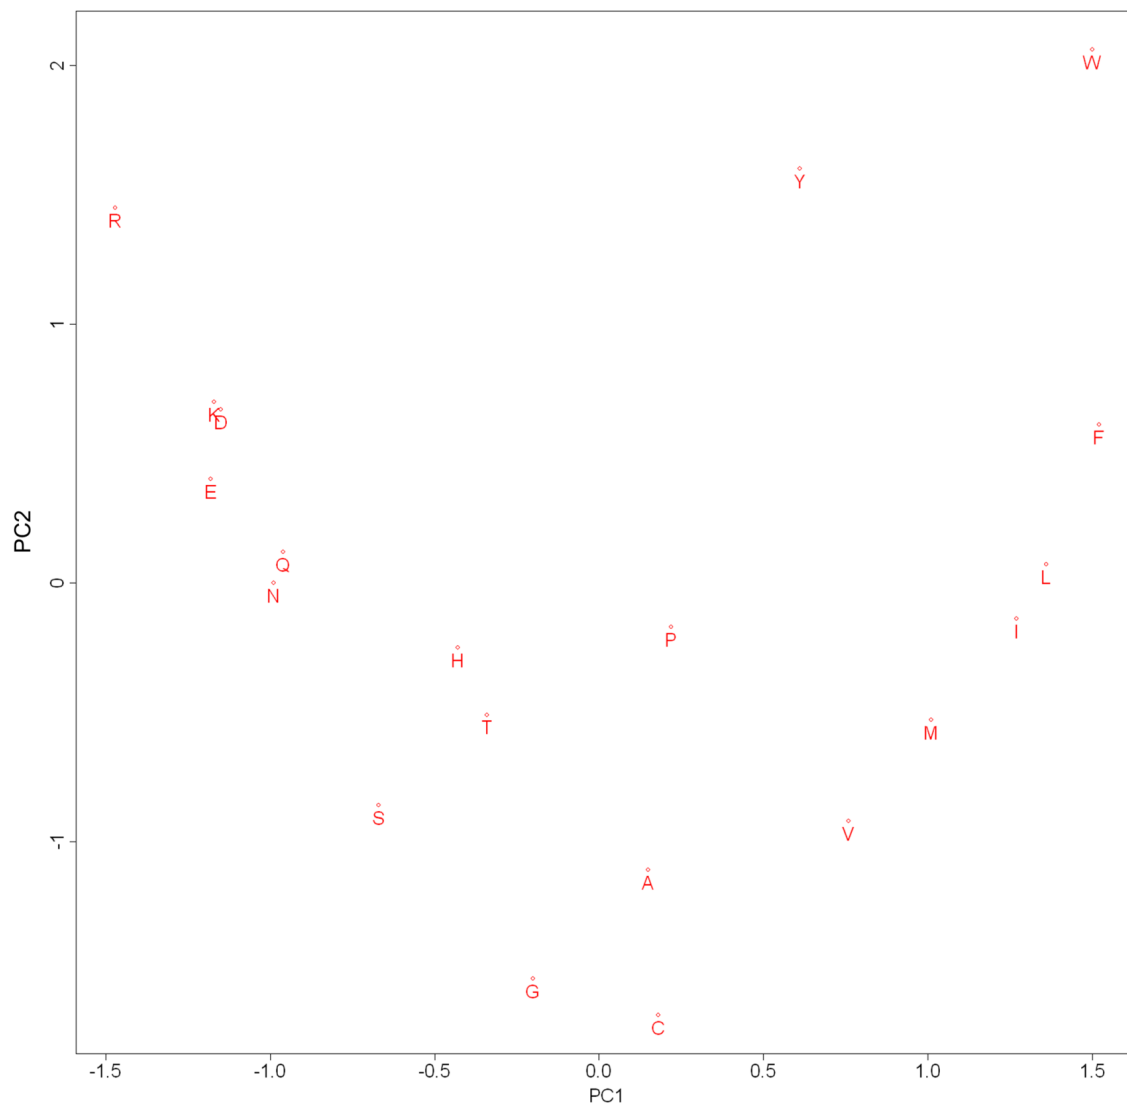

**Supporting figure S16.** Plot of the first two PCs in the VHSE descriptor set.

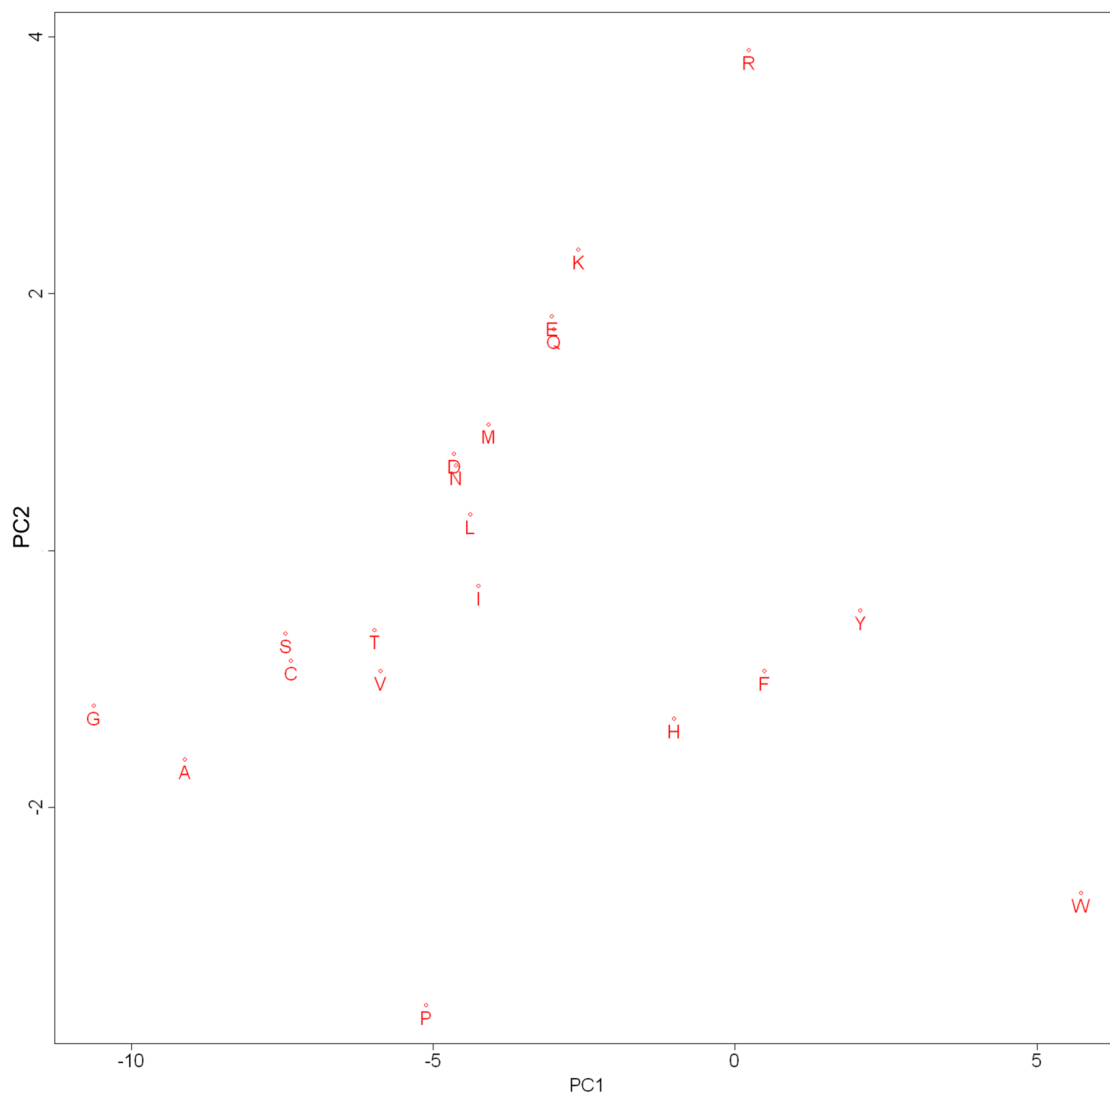

**Supporting figure S17.** Plot of the first two PCs in the T-scales descriptor set.

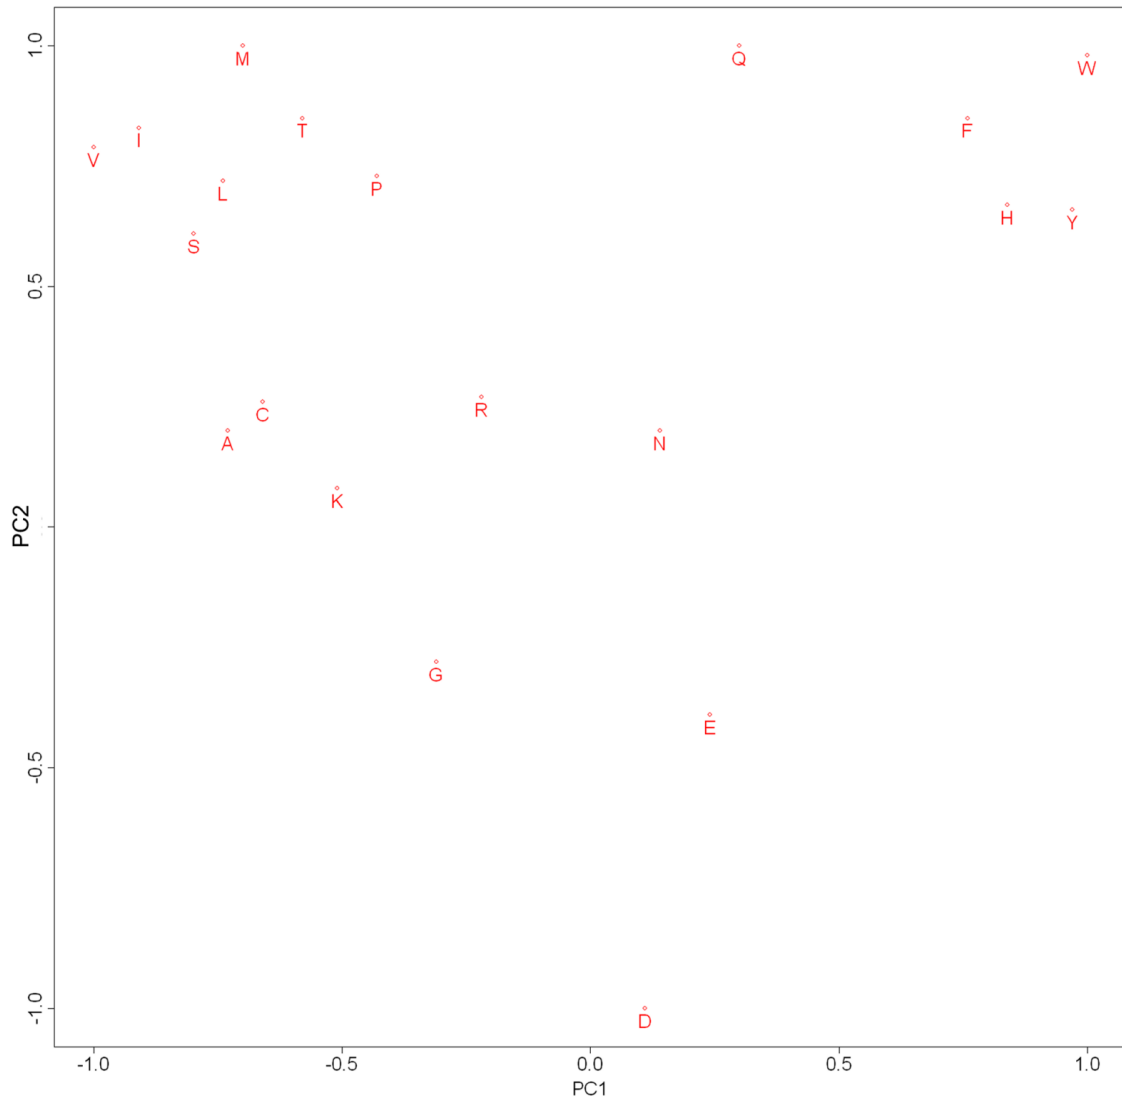

**Supporting figure S18.** Plot of the first two PCs in the MSWHIM descriptor set.

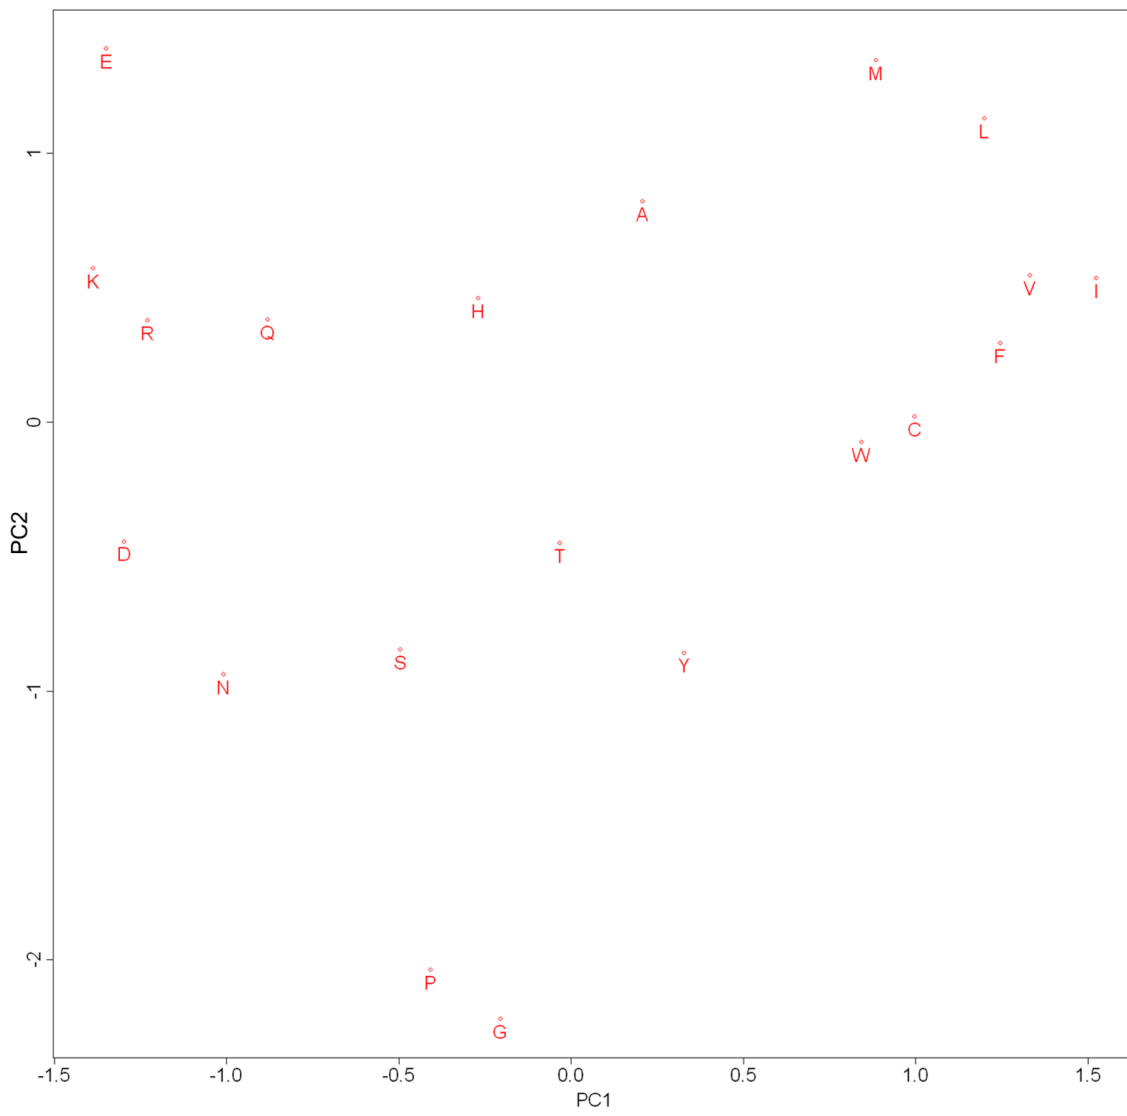

**Supporting figure S19.** Plot of the first two PCs in the FASGAI descriptor set.

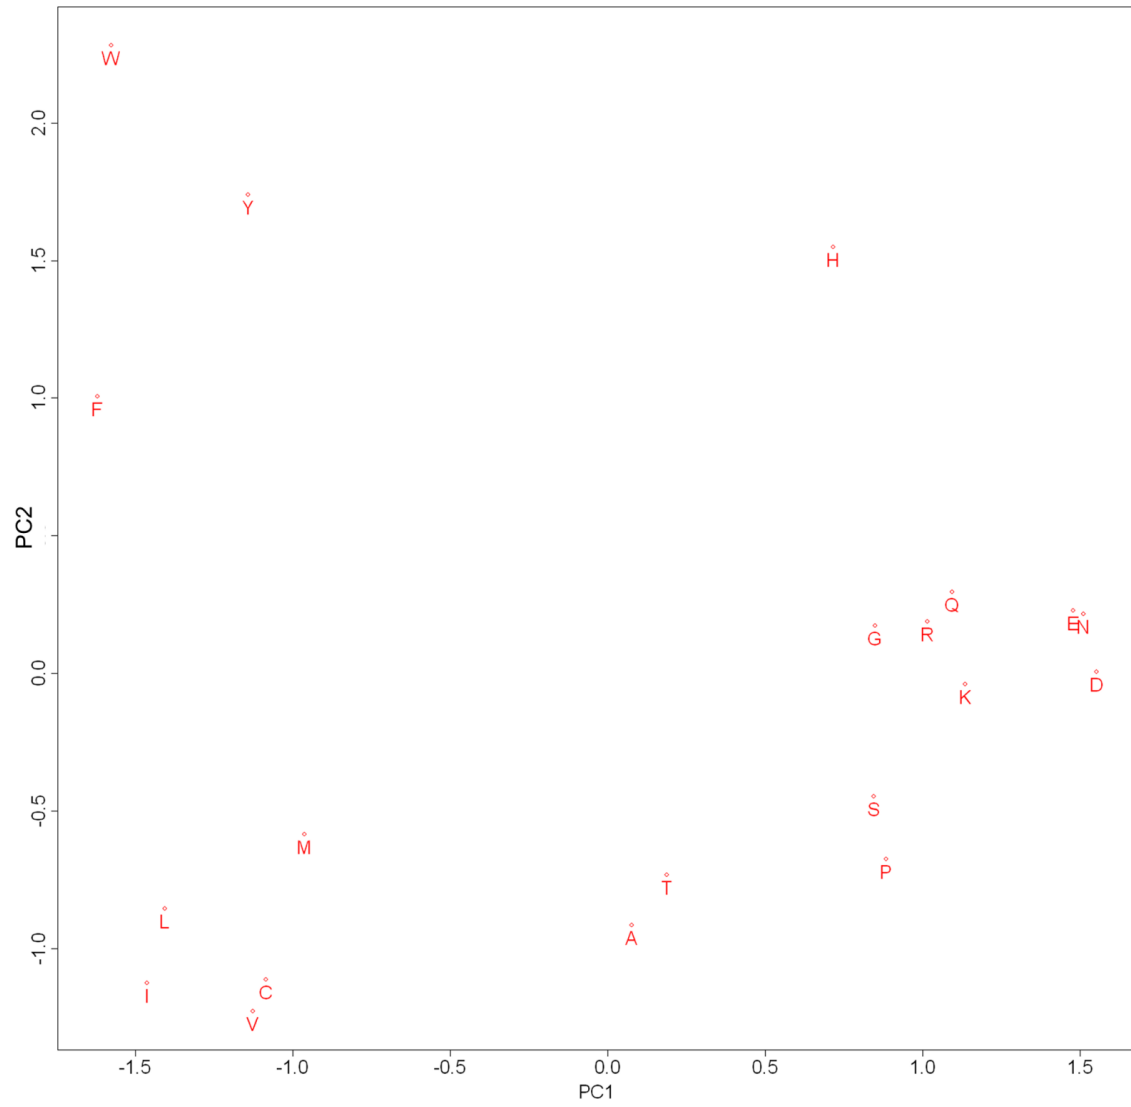

**Supporting figure S20.** Plot of the first two PCs in the BLOSUM descriptor set.
